# Supplementary material for: PCMT1 knockdown attenuates malignant properties by globally regulating transcriptome profiles in triple-negative breast cancer cells
Source: PeerJ. 2023 Nov 6;11:e16006. doi: 10.7717/peerj.16006 (PMC10634331; doi:10.7717/peerj.16006)
Supplement: Table S2 [file peerj-11-16006-s003.xlsx]

## Sheet: Raw data of OD
Group	OD450						Average
0h shNC	0.3188	0.489	0.4962	0.608	0.6596	0.6512	0.537133
0h shPCMT1	0.5214	0.5122	0.605	0.521	0.5505	0.5699	0.546667
24h shNC	0.9069	0.5676	0.7285	0.6771	0.4652	0.6882	0.67225
24h shPCMT1	0.5642	0.6114	0.5909	0.5831	0.5816	0.5008	0.572
48h shNC	1.8821	2.4821	0.3345	1.5584	2.3457	0.7586	1.56023
48h shPCMT1	0.5005	0.7269	0.873	0.8364	0.9214	0.3299	0.698017
72h shNC	1.1033	1.2304	1.4323	1.4957	1.8134	1.7967	1.47863
72h shPCMT1	1.1186	1.1131	1.1591	1.154	1.158	1.0139	1.11945

## Sheet: Apoptosis
Samples	Q1-UR %	Q1-LR %	Rate（UR+LR）
shNC_1	0.0381	0.0764	0.1145
shNC_2	0.0387	0.0722	0.1109
shNC_3	0.0378	0.0773	0.1151
shPCMT1_1	0.0216	0.0956	0.1172
shPCMT1_2	0.0215	0.0968	0.1183
shPCMT1_3	0.0305	0.0973	0.1278

## Sheet: Cell migration
Samples	Cell number 1	Cell number 2	Cell number 3	Average
shNC-1	190	195	203	196
shNC-2	295	171	268	244.667
shNC-3	173	104	171	149.333
shPCMT1-1	101	83	67	83.6667
sh-PCMT1-2	95	108	73	92
sh-PCMT1-3	27	45	51	41

## Sheet: Cell invasion
Samples	Cell number 1	Cell number 2	Cell number 3	Average
shNC-1	306	232	316	284.667
shNC-2	278	302	253	277.667
shNC-3	287	205	310	267.333
shPCMT1-1	87	83	80	83.3333
shPCMT1-2	85	84	72	80.3333
shPCMT1-3	113	116	125	118

## Sheet: FPKM value
Gene	NC_1	NC_2	NC_3	siPCMT1_1	siPCMT1_2	siPCMT1_3	Symbol	Chr	GeneType	Description
ENSG00000164978.18	22.99	24.3	20.73	20.21	20.46	19.17	NUDT2	chr9	protein_coding	nudix hydrolase 2
ENSG00000063127.16	0.15	0.19	0.22	0.05	0.07	0.06	SLC6A16	chr19	protein_coding	solute carrier family 6 member 16
ENSG00000238103.4	4.17	4.6	4.87	3.3	3.59	2.97	RPL9P7	chrX	processed_pseudogene	ribosomal protein L9 pseudogene 7
ENSG00000118096.10	3.08	3.7	3.28	3.47	3.29	3.58	IFT46	chr11	protein_coding	intraflagellar transport 46
ENSG00000229097.1	0.21	0.2	0	0	0.07	0.08	CALM2P2	chr10	processed_pseudogene	calmodulin 2 pseudogene 2
ENSG00000198911.12	15.04	15.12	15.81	11.47	11.96	10.83	SREBF2	chr22	protein_coding	sterol regulatory element binding transcription factor 2
ENSG00000204310.13	48.61	46.92	49.9	48.08	49.82	49.7	AGPAT1	chr6	protein_coding	1-acylglycerol-3-phosphate O-acyltransferase 1
ENSG00000228176.1	0	0.06	0	0	0.06	0	RP4-656G21.1	chr1	lncRNA	--
ENSG00000188493.15	4.79	4.66	5.3	4.77	4.47	5.09	C19orf54	chr19	protein_coding	chromosome 19 open reading frame 54
ENSG00000114988.12	13.03	13.51	14.25	13.05	12.51	12.83	LMAN2L	chr2	protein_coding	lectin, mannose binding 2 like
ENSG00000244588.6	0.17	0.16	0.1	0.13	0.13	0.14	RAD21L1	chr20	protein_coding	RAD21 cohesin complex component like 1
ENSG00000207003.1	0.3	0.28	0	0	0.3	0	RNU6-611P	chr19	snRNA	RNA, U6 small nuclear 611, pseudogene
ENSG00000143322.21	4.6	4.55	4.83	7.02	6.86	6.89	ABL2	chr1	protein_coding	ABL proto-oncogene 2, non-receptor tyrosine kinase
ENSG00000240032.1	0.57	0.5	0.33	0.46	0.8	0.7	LNCSRLR	chr3	lncRNA	lncRNA sorafenib resistance in renal cell carcinoma associated
ENSG00000227008.2	0	0.35	0.14	0	0.15	0.08	RPS24P19	chrX	processed_pseudogene	ribosomal protein S24 pseudogene 19
ENSG00000242060.1	0	0.04	0.07	0.04	0	0	RPS3AP49	chr18	processed_pseudogene	RPS3A pseudogene 49
ENSG00000226332.2	8.33	7.97	8.55	11.81	10.23	9.19	RP11-157P1.4	chr20	lncRNA	--
ENSG00000118971.9	0.07	0.05	0.06	0.4	0.43	0.41	CCND2	chr12	protein_coding	cyclin D2
ENSG00000204149.14	0.04	0.02	0.03	0.05	0.02	0.04	AGAP6	chr10	protein_coding	ArfGAP with GTPase domain, ankyrin repeat and PH domain 6
ENSG00000213695.3	0	0	0	0.06	0	0	RPS7P14	chrX	processed_pseudogene	ribosomal protein S7 pseudogene 14
ENSG00000272498.1	0.22	0	0	0.34	0.06	0.18	RP11-415F23.3	chr3	lncRNA	--
ENSG00000234742.1	0	0.05	0.05	0	0.06	0.18	AC144530.1	chr3	processed_pseudogene	--
ENSG00000286755.1	0	0	0	0	0	0.03	RP11-643E20.1	chr3	lncRNA	--
ENSG00000171916.17	0.03	0.01	0.01	0.01	0.03	0.03	LGALS9C	chr17	protein_coding	galectin 9C
ENSG00000258082.1	0	0	0.07	0	0	0	RP11-443B7.3	chr1	lncRNA	--
ENSG00000278311.5	5.21	5.54	5.67	5.81	6.15	5.98	GGNBP2	chr17	protein_coding	gametogenetin binding protein 2
ENSG00000081087.15	6.33	6.41	5.6	5.39	5.83	4.72	OSTM1	chr6	protein_coding	osteoclastogenesis associated transmembrane protein 1
ENSG00000272567.1	0.44	0.17	0.5	0.46	0.36	0.09	RP11-73K9.3	chr4	lncRNA	--
ENSG00000088727.14	0.79	0.83	0.92	0.96	1.19	0.99	KIF9	chr3	protein_coding	kinesin family member 9
ENSG00000134827.8	1.2	1.31	1.44	1.12	1.24	1.46	TCN1	chr11	protein_coding	transcobalamin 1
ENSG00000244675.2	0.02	0.03	0.01	0	0.04	0	AC108676.1	chr3	lncRNA	--
ENSG00000131848.10	0.29	0.28	0.27	0.21	0.21	0.25	ZSCAN5A	chr19	protein_coding	zinc finger and SCAN domain containing 5A
ENSG00000244005.13	3.73	3.61	3.55	4.2	3.73	3.91	NFS1	chr20	protein_coding	NFS1 cysteine desulfurase
ENSG00000267741.1	0	0	0	0.07	0.07	0.07	UBE2L4	chr19	processed_pseudogene	ubiquitin conjugating enzyme E2 L4 (pseudogene)
ENSG00000147874.11	2.39	2.45	2.78	2.57	2.81	2.46	HAUS6	chr9	protein_coding	HAUS augmin like complex subunit 6
ENSG00000272768.1	0.37	0.16	0.38	0.31	0.33	0.34	RP4-673M15.1	chr7	lncRNA	--
ENSG00000224932.2	0	0	0	0	0.03	0	LINC02262	chr4	lncRNA	long intergenic non-protein coding RNA 2262
ENSG00000168394.12	22.75	22.89	22.55	26.54	27.09	27.97	TAP1	chr6	protein_coding	transporter 1, ATP binding cassette subfamily B member
ENSG00000273302.1	0.04	0	0	0.08	0	0.08	RP11-493E12.2	chr2	lncRNA	--
ENSG00000272186.1	0.29	0.45	0.44	0.2	0.68	1.02	VPS11-DT	chr11	lncRNA	VPS11 divergent transcript
ENSG00000174600.14	0.07	0.05	0.06	0.34	0.32	0.29	CMKLR1	chr12	protein_coding	chemerin chemokine-like receptor 1
ENSG00000240877.3	0.21	0.69	0.29	0.65	0.53	0	RN7SL521P	chr7	misc_RNA	RNA, 7SL, cytoplasmic 521, pseudogene
ENSG00000211893.4	0.16	0.06	0.08	0.12	0.22	0.1	IGHG2	chr14	IG_C_gene	immunoglobulin heavy constant gamma 2 (G2m marker)
ENSG00000213997.3	0.08	0	0.2	0.18	0.04	0.18	PGAM1P7	chrX	processed_pseudogene	phosphoglycerate mutase 1 pseudogene 7
ENSG00000287580.1	0	0.11	0	0	0.06	0	RP11-797H7.8	chr7	lncRNA	--
ENSG00000260088.1	0.04	0.04	0.04	0.04	0	0	DDX59-AS1	chr1	lncRNA	DDX59 antisense RNA 1
ENSG00000183648.11	32.11	33.91	34.07	27.89	29.17	27.6	NDUFB1	chr14	protein_coding	NADH:ubiquinone oxidoreductase subunit B1
ENSG00000178057.15	29.45	27.97	29.41	37.45	38.93	38.06	NDUFAF3	chr3	protein_coding	NADH:ubiquinone oxidoreductase complex assembly factor 3
ENSG00000267827.5	3.26	2.79	2.65	3.09	3.11	4.04	CTC-471J1.8	chr19	lncRNA	--
ENSG00000236773.1	0	0.25	0	0	0.14	0	RP11-365O16.1	chr1	processed_pseudogene	--
ENSG00000255101.1	0	0	0	0.05	0	0	RP11-412B14.1	chr8	lncRNA	--
ENSG00000174791.11	9.34	8.67	9.31	8.52	8.72	9.41	RIN1	chr11	protein_coding	Ras and Rab interactor 1
ENSG00000163884.4	1.15	1.26	1.2	1.08	1	1.11	KLF15	chr3	protein_coding	Kruppel like factor 15
ENSG00000271524.1	0.05	0.05	0	0	0.11	0	BNIP3P17	chr19	processed_pseudogene	BCL2 interacting protein 3 pseudogene 17
ENSG00000272682.1	0	0.02	0.02	0	0	0.02	AC004471.10	chr22	lncRNA	--
ENSG00000239944.1	0.11	0.11	0.11	0.12	0	0	TRBV8-2	chr7	TR_V_pseudogene	T cell receptor beta variable 8-2 (pseudogene)
ENSG00000266412.6	36.08	34.94	36.02	35.94	36.91	36.16	NCOA4	chr10	protein_coding	nuclear receptor coactivator 4
ENSG00000122203.15	35.4	34.33	34.95	34.2	34.53	34.74	KIAA1191	chr5	protein_coding	KIAA1191
ENSG00000143028.9	0.8	0.81	0.82	0.6	0.59	0.57	SYPL2	chr1	protein_coding	synaptophysin like 2
ENSG00000238041.3	0	0	0.11	0	0	0	TMEM230P2	chr11	processed_pseudogene	TMEM230 pseudogene 2
ENSG00000168071.22	0.77	0.75	0.73	0.79	0.62	0.86	CCDC88B	chr11	protein_coding	coiled-coil domain containing 88B
ENSG00000271966.1	0.08	0.13	0.05	0.17	0.03	0.15	ARFGEF1-DT	chr8	lncRNA	ARFGEF1 divergent transcript
ENSG00000196664.5	0.03	0.03	0.03	0.03	0	0	TLR7	chrX	protein_coding	toll like receptor 7
ENSG00000275449.1	0.46	0	0	0	0	0	MIR6859-3	chr15	miRNA	microRNA 6859-3
ENSG00000270558.1	1.93	2.66	2.61	2.15	2.09	2	CTD-2124B8.2	chr5	processed_pseudogene	--
ENSG00000231527.7	0.01	0.01	0.01	0.02	0.02	0.03	FAM27C	chr9	lncRNA	family with sequence similarity 27 member C
ENSG00000244256.3	0.2	0.29	0	0.21	0.1	0.22	RN7SL130P	chr1	misc_RNA	RNA, 7SL, cytoplasmic 130, pseudogene
ENSG00000162928.9	2.62	2.56	2.37	2.85	3.01	3.04	PEX13	chr2	protein_coding	peroxisomal biogenesis factor 13
ENSG00000114391.13	200.14	211.1	209.74	212.99	223.66	212.14	RPL24	chr3	protein_coding	ribosomal protein L24
ENSG00000109674.4	3.38	3.9	3.71	4.68	4.66	4.38	NEIL3	chr4	protein_coding	nei like DNA glycosylase 3
ENSG00000100393.14	2.44	2.35	2.43	2.48	2.19	2.27	EP300	chr22	protein_coding	E1A binding protein p300
ENSG00000266304.1	0	0.08	0.08	0.08	0.08	0	LIVAR	chr18	lncRNA	liver cell viability associated lncRNA
ENSG00000279601.1	0.01	0	0	0	0	0	CTA-38K21.2	chrX	TEC	--
ENSG00000089775.12	0.81	0.94	1.02	0.89	0.89	0.74	ZBTB25	chr14	protein_coding	zinc finger and BTB domain containing 25
ENSG00000287564.1	0.05	0.05	0	0	0.11	0	RP11-125C10.1	chr10	lncRNA	--
ENSG00000221866.9	0.01	0.01	0.02	0.01	0.01	0.02	PLXNA4	chr7	protein_coding	plexin A4
ENSG00000224251.6	0.32	0	0.18	0	0	0	RP11-499O7.7	chr10	lncRNA	--
ENSG00000262172.1	0	0	0.33	0.07	0.14	0.15	CTD-2529O21.1	chr17	lncRNA	--
ENSG00000140279.13	0.01	0	0	0.01	0	0	DUOX2	chr15	protein_coding	dual oxidase 2
ENSG00000225778.5	0.05	0.02	0.06	0.08	0.02	0.03	PROSER2-AS1	chr10	lncRNA	PROSER2 antisense RNA 1
ENSG00000204176.14	0.05	0.06	0.04	0.02	0.03	0	SYT15	chr10	protein_coding	synaptotagmin 15
ENSG00000232542.1	0	0	0	0.08	0	0	DPYD-IT1	chr1	lncRNA	DPYD intronic transcript 1
ENSG00000135482.7	0.52	0.53	0.49	0.61	0.51	0.57	ZC3H10	chr12	protein_coding	zinc finger CCCH-type containing 10
ENSG00000125901.6	55.89	55.98	49.6	55.97	59.69	62.12	MRPS26	chr20	protein_coding	mitochondrial ribosomal protein S26
ENSG00000165572.8	1.69	1.61	1.37	1.33	1.42	1.13	KBTBD6	chr13	protein_coding	kelch repeat and BTB domain containing 6
ENSG00000085741.13	0.1	0.05	0.07	0.01	0	0.01	WNT11	chr11	protein_coding	Wnt family member 11
ENSG00000055163.20	0.08	0.07	0.03	0.17	0.13	0.13	CYFIP2	chr5	protein_coding	cytoplasmic FMR1 interacting protein 2
ENSG00000237481.1	0.15	0.05	0.05	0	0.2	0	RP4-803J11.2	chr1	lncRNA	--
ENSG00000207359.1	0	0	1.11	0	0.3	0.64	RNU6-925P	chr8	snRNA	RNA, U6 small nuclear 925, pseudogene
ENSG00000244314.3	0	0	0	0.12	0	0	RN7SL36P	chr3	misc_RNA	RNA, 7SL, cytoplasmic 36, pseudogene
ENSG00000216035.1	0	0	0	0	0	0.4	MIR938	chr10	miRNA	microRNA 938
ENSG00000171824.14	12.14	11.64	11.71	12.28	12.57	13.38	EXOSC10	chr1	protein_coding	exosome component 10
ENSG00000279425.1	0.1	0.17	0.12	0.16	0	0.17	CTD-2017D11.2	chr19	TEC	--
ENSG00000273821.1	0.67	0.51	0.69	1.05	0.75	0.65	RP5-963E22.6	chr20	lncRNA	--
ENSG00000197405.8	0.23	0.11	0.11	0.1	0.14	0.16	C5AR1	chr19	protein_coding	complement C5a receptor 1
ENSG00000182247.10	10.49	11.06	11.17	10.14	11.74	11.28	UBE2E2	chr3	protein_coding	ubiquitin conjugating enzyme E2 E2
ENSG00000101019.22	9.44	9.21	8.98	10.4	10.88	10.67	UQCC1	chr20	protein_coding	ubiquinol-cytochrome c reductase complex assembly factor 1
ENSG00000257298.1	0	0	0	0.01	0.01	0.01	RP3-405J10.3	chr12	lncRNA	--
ENSG00000265749.6	0	0	0	0	0	0.02	RP11-849F2.5	chr17	lncRNA	--
ENSG00000144029.12	10.07	9.93	10.04	8.96	9.11	8.55	MRPS5	chr2	protein_coding	mitochondrial ribosomal protein S5
ENSG00000265996.1	0.35	0	0	0.37	0	0	MIR3671	chr1	miRNA	microRNA 3671
ENSG00000229585.4	0	0.06	0.12	0	0.07	0.07	RPL21P44	chr4	processed_pseudogene	ribosomal protein L21 pseudogene 44
ENSG00000258592.1	0.02	0	0	0	0	0.06	RP11-108M12.3	chr14	lncRNA	--
ENSG00000069020.18	0.53	0.6	0.56	0.61	0.61	0.64	MAST4	chr5	protein_coding	microtubule associated serine/threonine kinase family member 4
ENSG00000249693.3	0.07	0.05	0.06	0.04	0.02	0.02	THEGL	chr4	protein_coding	theg spermatid protein like
ENSG00000062282.15	0.84	0.8	0.94	1.69	1.73	1.78	DGAT2	chr11	protein_coding	diacylglycerol O-acyltransferase 2
ENSG00000267968.1	0	0	0	0	0.08	0	AC011523.2	chr19	lncRNA	--
ENSG00000204439.4	12.36	13.68	13.13	18.88	17.63	17.77	C6orf47	chr6	protein_coding	chromosome 6 open reading frame 47
ENSG00000213513.3	0.04	0.04	0.02	0.04	0.06	0.02	IMPDH1P5	chr10	processed_pseudogene	inosine monophosphate dehydrogenase 1 pseudogene 5
ENSG00000280122.1	0	0	0.01	0	0	0	RP11-87G24.2	chr17	TEC	--
ENSG00000274383.1	1.37	3.27	1.99	1.56	1.39	1.4	CTD-2017F17.2	chr15	lncRNA	--
ENSG00000255306.1	0.08	0.08	0.12	0.13	0.04	0.09	RP5-901A4.1	chr11	lncRNA	--
ENSG00000286689.1	0	0	0	0	0	0.09	RP11-2B2.1	chr3	lncRNA	--
ENSG00000171202.7	38.34	39.96	41.33	36.09	38.06	33.71	TMEM126A	chr11	protein_coding	transmembrane protein 126A
ENSG00000279951.1	0	0.02	0.02	0	0	0	RP11-264J4.8	chr13	TEC	--
ENSG00000049246.15	1.12	1.28	1.34	1.01	0.99	0.84	PER3	chr1	protein_coding	period circadian regulator 3
ENSG00000267249.1	1.64	1.59	1.52	1.67	1.62	0.92	RP11-973H7.3	chr18	lncRNA	--
ENSG00000214012.4	0.02	0	0	0	0	0.03	KRT18P38	chr6	processed_pseudogene	keratin 18 pseudogene 38
ENSG00000156983.17	3.06	2.75	3.04	3.26	3.43	3.23	BRPF1	chr3	protein_coding	bromodomain and PHD finger containing 1
ENSG00000112303.14	0.18	0.08	0.06	0.21	0.27	0.13	VNN2	chr6	protein_coding	vanin 2
ENSG00000168496.4	59.27	58.42	54.19	61.07	64.06	63.62	FEN1	chr11	protein_coding	flap structure-specific endonuclease 1
ENSG00000214389.2	5.34	5.61	4.26	4.92	5.71	3.93	RPS3AP26	chr7	processed_pseudogene	RPS3A pseudogene 26
ENSG00000234006.1	0.18	0.17	0.27	0	0.18	0.13	DDX39B-AS1	chr6	lncRNA	DDX39B antisense RNA 1
ENSG00000215148.11	0	0	0	0.03	0	0	PRSS41	chr16	protein_coding	serine protease 41
ENSG00000287619.1	0.03	0.05	0	0.05	0.03	0.04	LL0XNC01-246D9.1	chrX	lncRNA	--
ENSG00000260641.1	0.07	0.11	0.08	0.11	0.16	0.1	RP11-1299A16.3	chr4	lncRNA	--
ENSG00000172578.12	0.01	0	0	0	0	0	KLHL6	chr3	protein_coding	kelch like family member 6
ENSG00000163832.16	12.72	11.92	11.19	13.23	13.49	14.03	ELP6	chr3	protein_coding	elongator acetyltransferase complex subunit 6
ENSG00000254343.2	0.04	0.08	0.04	0	0.04	0	RP11-760H22.2	chr8	lncRNA	--
ENSG00000100342.21	8.43	7.96	8.86	8.7	9.17	8.81	APOL1	chr22	protein_coding	apolipoprotein L1
ENSG00000205269.6	0.69	0.64	0.76	0.52	0.43	0.54	TMEM170B	chr6	protein_coding	transmembrane protein 170B
ENSG00000125656.11	25.59	25.96	26.66	27.37	28.09	30	CLPP	chr19	protein_coding	caseinolytic mitochondrial matrix peptidase proteolytic subunit
ENSG00000244471.6	0.01	0.01	0.01	0	0	0	RP11-78J21.5	chr13	transcribed_unprocessed_pseudogene	--
ENSG00000213169.3	0	0.04	0	0	0	0	RP11-393N4.2	chr3	processed_pseudogene	--
ENSG00000258056.2	2.58	1.97	2.36	2.74	2.29	2.46	RP11-644F5.11	chr12	lncRNA	--
ENSG00000167747.15	27.05	27.47	27.03	35.24	33.22	34.69	C19orf48	chr19	transcribed_unitary_pseudogene	chromosome 19 open reading frame 48
ENSG00000224023.10	0.55	0.66	0.52	0.57	0.66	0.46	EDRF1-DT	chr10	lncRNA	EDRF1 divergent transcript
ENSG00000165795.24	0.89	0.96	1.07	0.6	0.55	0.52	NDRG2	chr14	protein_coding	NDRG family member 2
ENSG00000230565.1	0.38	0.32	0.29	0.14	0.17	0.07	ZNF32-AS2	chr10	lncRNA	ZNF32 antisense RNA 2
ENSG00000229780.1	0.65	0.61	0.47	0.6	0.29	0.54	UBE2Q1-AS1	chr1	lncRNA	UBE2Q1 antisense RNA 1
ENSG00000259768.6	0.29	0.27	0.25	0.49	0.37	0.39	RP5-991G20.1	chr16	lncRNA	--
ENSG00000175334.8	245.01	246.75	243.31	227.1	242.32	240.05	BANF1	chr11	protein_coding	BAF nuclear assembly factor 1
ENSG00000253555.1	0	0.02	0	0	0	0	TARDBPP4	chr8	unprocessed_pseudogene	TARDBP pseudogene 4
ENSG00000204472.13	0.25	0.31	0.44	0.42	0.23	0.37	AIF1	chr6	protein_coding	allograft inflammatory factor 1
ENSG00000166183.16	0	0.01	0	0	0.01	0	ASPG	chr14	protein_coding	asparaginase
ENSG00000177889.10	20.42	19.7	19.73	22.52	23.98	23.73	UBE2N	chr12	protein_coding	ubiquitin conjugating enzyme E2 N
ENSG00000255299.5	0.03	0	0	0	0	0	RP11-655C2.3	chr11	lncRNA	--
ENSG00000213071.11	0.34	0.44	0.52	0.24	0.21	0.21	LPAL2	chr6	transcribed_unprocessed_pseudogene	lipoprotein(a) like 2, pseudogene
ENSG00000226533.1	0	0	0	0	0	0.12	BTBD9-AS1	chr6	lncRNA	BTBD9 antisense RNA 1
ENSG00000248101.2	13.99	14.28	14.64	17.36	18.11	19.53	AC002116.8	chr19	lncRNA	--
ENSG00000115363.14	3.52	3.61	3.34	6.31	6.47	6.2	EVA1A	chr2	protein_coding	eva-1 homolog A, regulator of programmed cell death
ENSG00000171840.13	2.34	2.4	2.05	1.94	1.73	1.62	NINJ2	chr12	protein_coding	ninjurin 2
ENSG00000136694.9	0.03	0	0	0	0	0	IL36A	chr2	protein_coding	interleukin 36 alpha
ENSG00000230155.6	0.07	0	0.03	0	0.04	0.04	CEP250-AS1	chr20	lncRNA	CEP250 antisense RNA 1
ENSG00000174501.14	0.1	0.08	0.13	0.1	0.08	0.06	ANKRD36C	chr2	protein_coding	ankyrin repeat domain 36C
ENSG00000279283.1	0.04	0	0	0.04	0	0	RP11-417L19.5	chr12	TEC	--
ENSG00000164023.14	5.73	6	5.38	5.51	5.84	5.12	SGMS2	chr4	protein_coding	sphingomyelin synthase 2
ENSG00000249839.1	0	0.01	0	0	0	0.01	AC011330.5	chr15	unprocessed_pseudogene	--
ENSG00000143318.13	0.01	0	0	0	0	0	CASQ1	chr1	protein_coding	calsequestrin 1
ENSG00000168291.13	24.65	25.2	24.03	21.49	22.76	22.28	PDHB	chr3	protein_coding	pyruvate dehydrogenase E1 subunit beta
ENSG00000101160.15	17.87	17.83	18.64	16.37	17.01	16.9	CTSZ	chr20	protein_coding	cathepsin Z
ENSG00000213064.10	6.03	5.78	5.43	4.82	4.85	4.68	SFT2D2	chr1	protein_coding	SFT2 domain containing 2
ENSG00000110066.15	2.46	2.23	2.75	2.24	2.31	2.26	KMT5B	chr11	protein_coding	lysine methyltransferase 5B
ENSG00000248439.2	0.1	0	0.1	0.11	0	0	RPL23AP94	chr4	processed_pseudogene	ribosomal protein L23a pseudogene 94
ENSG00000275572.1	0.04	0	0	0	0	0	GRIFIN	chr7	protein_coding	galectin-related inter-fiber protein
ENSG00000252947.1	0	0.18	0.17	0	0	0	SCARNA1	chr1	scaRNA	small Cajal body-specific RNA 1
ENSG00000135913.11	1.08	1.25	1.32	1.24	1.17	1.22	USP37	chr2	protein_coding	ubiquitin specific peptidase 37
ENSG00000175155.11	0.26	0.35	0.28	0.2	0.25	0.29	YPEL2	chr17	protein_coding	yippee like 2
ENSG00000239653.1	0.01	0.07	0.05	0.12	0.1	0.09	PSMD6-AS2	chr3	lncRNA	PSMD6 antisense RNA 2
ENSG00000268230.5	0.19	0.14	0.17	0.09	0.15	0.09	CTD-2619J13.8	chr19	lncRNA	--
ENSG00000135951.16	0.34	0.36	0.3	0.39	0.23	0.31	TSGA10	chr2	protein_coding	testis specific 10
ENSG00000197696.10	10.92	10.05	11.56	10.34	10.52	9.82	NMB	chr15	protein_coding	neuromedin B
ENSG00000100147.14	1.64	1.53	1.72	1.66	1.81	1.78	CCDC134	chr22	protein_coding	coiled-coil domain containing 134
ENSG00000259916.1	0	0	0	0	0.03	0	RP11-407P15.2	chr2	protein_coding	--
ENSG00000163331.12	0.02	0	0	0	0	0	DAPL1	chr2	protein_coding	death associated protein like 1
ENSG00000267686.2	0.03	0	0	0.14	0.17	0.07	RP11-795H16.3	chr18	lncRNA	--
ENSG00000264644.1	0	0	0	0	0.03	0	KRT18P8	chr18	processed_pseudogene	keratin 18 pseudogene 8
ENSG00000248128.1	0	0	0	0	0	0.11	RP11-777B9.4	chr4	processed_pseudogene	--
ENSG00000164039.15	1.58	1.74	1.62	1.18	1.31	1.02	BDH2	chr4	protein_coding	3-hydroxybutyrate dehydrogenase 2
ENSG00000261600.1	1.29	1.61	1.47	2.09	2.09	1.69	RP11-575H3.1	chr2	lncRNA	--
ENSG00000196290.16	18.31	16.4	17.36	16.33	16.12	17.21	NIF3L1	chr2	protein_coding	NGG1 interacting factor 3 like 1
ENSG00000160606.11	10.32	10.12	9.81	10.77	11.45	11.46	TLCD1	chr17	protein_coding	TLC domain containing 1
ENSG00000232040.4	0.16	0.16	0.15	0.17	0.17	0.19	ZBED9	chr6	protein_coding	zinc finger BED-type containing 9
ENSG00000133055.9	0.09	0.05	0.13	0	0.03	0	MYBPH	chr1	protein_coding	myosin binding protein H
ENSG00000254467.2	0	0	0	0	0	0.01	RP11-634B22.4	chr11	lncRNA	--
ENSG00000117481.11	1.01	1.09	1.17	1.41	1.54	1.64	NSUN4	chr1	protein_coding	NOP2/Sun RNA methyltransferase 4
ENSG00000171617.15	16.81	17.01	16.73	15.33	15.11	15.34	ENC1	chr5	protein_coding	ectodermal-neural cortex 1
ENSG00000234912.12	0.94	0.98	0.9	1.07	0.84	1.03	SNHG20	chr17	lncRNA	small nucleolar RNA host gene 20
ENSG00000129680.16	5.74	5.47	6.25	9.23	9.04	8.88	MAP7D3	chrX	protein_coding	MAP7 domain containing 3
ENSG00000259407.1	0.26	0.21	0.27	0.24	0.16	0.07	RP11-158M2.3	chr15	lncRNA	--
ENSG00000163517.15	2.78	3.34	3.07	2.08	2.54	2.54	HDAC11	chr3	protein_coding	histone deacetylase 11
ENSG00000103495.14	63.14	65.5	68	66.41	67.61	69.29	MAZ	chr16	protein_coding	MYC associated zinc finger protein
ENSG00000233929.1	0.33	0.16	0	0	0.34	0.18	MT1XP1	chr1	processed_pseudogene	metallothionein 1X pseudogene 1
ENSG00000156273.16	3.24	3.12	2.83	2.83	2.69	2.71	BACH1	chr21	protein_coding	BTB domain and CNC homolog 1
ENSG00000185033.14	6.49	6.54	6.84	8.24	7.95	8.19	SEMA4B	chr15	protein_coding	semaphorin 4B
ENSG00000265393.1	1.65	1.65	2.9	2.01	1.68	1.67	CTD-2517M22.17	chr8	lncRNA	--
ENSG00000196670.14	1.51	1.23	1.29	1.01	1.32	1.1	ZFP62	chr5	protein_coding	ZFP62 zinc finger protein
ENSG00000133878.9	0	0	0	0.02	0	0.05	DUSP26	chr8	protein_coding	dual specificity phosphatase 26
ENSG00000064419.14	12.99	13.12	14.47	14.8	14.43	14.6	TNPO3	chr7	protein_coding	transportin 3
ENSG00000088448.14	4.54	4.35	4.04	4.43	3.48	3.98	ANKRD10	chr13	protein_coding	ankyrin repeat domain 10
ENSG00000186105.8	0	0.03	0	0.03	0.03	0.03	LRRC70	chr5	protein_coding	leucine rich repeat containing 70
ENSG00000270490.1	0	0	0	0	0	0.02	RP11-622C24.1	chr15	processed_pseudogene	--
ENSG00000266278.1	0.28	0.08	0.21	0.18	0.07	0.1	LINC01910	chr18	lncRNA	long intergenic non-protein coding RNA 1910
ENSG00000141441.16	0.22	0.18	0.2	0.26	0.3	0.28	GAREM1	chr18	protein_coding	GRB2 associated regulator of MAPK1 subtype 1
ENSG00000274333.4	0.03	0.02	0.03	0.01	0.03	0.03	RP11-717F1.2	chr21	lncRNA	--
ENSG00000100505.14	0	0.01	0.04	0.01	0.04	0.02	TRIM9	chr14	protein_coding	tripartite motif containing 9
ENSG00000136040.9	0.09	0.11	0.12	0.12	0.12	0.11	PLXNC1	chr12	protein_coding	plexin C1
ENSG00000142459.8	6.56	6.62	6.82	7.56	7.63	8.9	EVI5L	chr19	protein_coding	ecotropic viral integration site 5 like
ENSG00000272849.1	0.11	0	0.1	0	0	0.06	RP11-347I19.8	chr12	lncRNA	--
ENSG00000214376.6	0.11	0.09	0.05	0.05	0.03	0.08	VSTM5	chr11	protein_coding	V-set and transmembrane domain containing 5
ENSG00000196081.10	0.55	0.38	0.32	0.4	0.48	0.35	ZNF724	chr19	protein_coding	zinc finger protein 724
ENSG00000132466.19	4.3	4.19	4.38	4.13	4.21	4.16	ANKRD17	chr4	protein_coding	ankyrin repeat domain 17
ENSG00000126249.8	4.97	5.7	5.51	7.33	8.11	8.03	PDCD2L	chr19	protein_coding	programmed cell death 2 like
ENSG00000196526.11	8.85	8.58	8.44	11.03	10.66	10.85	AFAP1	chr4	protein_coding	actin filament associated protein 1
ENSG00000177697.19	106.35	106.09	118.99	118.63	123.21	121.84	CD151	chr11	protein_coding	CD151 molecule (Raph blood group)
ENSG00000250379.1	0.13	0.06	0.15	0.26	0.16	0.07	RP11-23P13.4	chr15	lncRNA	--
ENSG00000262248.1	0	0	0	0.09	0.09	0	RP11-235E17.5	chr17	processed_pseudogene	--
ENSG00000166436.17	0.24	0.24	0.28	0.26	0.19	0.2	TRIM66	chr11	protein_coding	tripartite motif containing 66
ENSG00000235869.1	0	0	0.17	0	0	0	RP1-102G20.4	chr1	processed_pseudogene	--
ENSG00000137812.20	1.77	2.13	1.86	2.04	1.92	1.89	KNL1	chr15	protein_coding	kinetochore scaffold 1
ENSG00000254338.1	0	0.21	0.28	0.31	0.08	0.08	MAFA-AS1	chr8	lncRNA	MAFA antisense RNA 1
ENSG00000138696.11	0.12	0.07	0.07	0.46	0.44	0.34	BMPR1B	chr4	protein_coding	bone morphogenetic protein receptor type 1B
ENSG00000141458.13	12.7	12.89	12.86	15.8	16.46	15.67	NPC1	chr18	protein_coding	NPC intracellular cholesterol transporter 1
ENSG00000171621.14	7.98	7.44	8.24	9.22	8.83	10.16	SPSB1	chr1	protein_coding	splA/ryanodine receptor domain and SOCS box containing 1
ENSG00000287750.1	0	0.04	0.04	0.05	0.05	0.15	RP11-350E12.7	chr9	lncRNA	--
ENSG00000141499.17	6.06	6	6.35	6.56	6.54	6.8	WRAP53	chr17	protein_coding	WD repeat containing antisense to TP53
ENSG00000255835.1	13.85	13.75	14.88	16.44	16.67	16.6	RP4-559A3.7	chr1	protein_coding	--
ENSG00000259017.1	0.18	0.17	0.17	0.51	0.13	0.2	RP11-561B11.6	chr14	lncRNA	--
ENSG00000215788.11	0.14	0.12	0.12	0.17	0.13	0.09	TNFRSF25	chr1	protein_coding	TNF receptor superfamily member 25
ENSG00000128487.18	2.12	2.13	2.14	2.09	2.18	2.07	SPECC1	chr17	protein_coding	sperm antigen with calponin homology and coiled-coil domains 1
ENSG00000286599.1	0.42	0.48	0.31	0.29	0.36	0.28	RP11-345F18.3	chr4	lncRNA	--
ENSG00000273812.3	0.17	0.1	0.09	0.27	0.19	0.18	WI2-87327B8.2	chr20	lncRNA	--
ENSG00000233360.4	0.1	0.09	0.09	0.13	0.24	0.12	PDXP-DT	chr22	lncRNA	PDXP divergent transcript
ENSG00000071246.11	0.45	0.33	0.38	0.18	0.24	0.18	VASH1	chr14	protein_coding	vasohibin 1
ENSG00000258017.2	28.52	26.26	21.46	22.38	21.16	19.09	RP11-386G11.10	chr12	lncRNA	--
ENSG00000243680.1	0.11	0	0	0	0.64	0	RPL37P23	chr19	processed_pseudogene	ribosomal protein L37 pseudogene 23
ENSG00000288033.1	0.03	0.16	0.03	0.1	0	0	RP13-46H24.3	chr11	lncRNA	--
ENSG00000053371.13	36.05	33.07	33.7	32.84	35.56	35.66	AKR7A2	chr1	protein_coding	aldo-keto reductase family 7 member A2
ENSG00000200953.1	0	0.27	0	0	0	0	Y_RNA	chr12	misc_RNA	--
ENSG00000255839.1	0.39	0.18	0.18	0.1	0.1	0.21	RP11-338K17.8	chr12	lncRNA	--
ENSG00000170260.9	4.89	4.94	4.88	4.9	4.84	4.91	ZNF212	chr7	protein_coding	zinc finger protein 212
ENSG00000142552.8	1.69	1.72	1.83	2.02	2.11	1.69	RCN3	chr19	protein_coding	reticulocalbin 3
ENSG00000211892.4	0.03	0.1	0.03	0.05	0.07	0.07	IGHG4	chr14	IG_C_gene	immunoglobulin heavy constant gamma 4 (G4m marker)
ENSG00000225883.2	0	0	0.03	0	0	0	BMS1P11	chr9	unprocessed_pseudogene	BMS1 pseudogene 11
ENSG00000277072.5	1.27	0.93	1.13	0.78	1	0.71	STAG3L2	chr7	transcribed_unprocessed_pseudogene	stromal antigen 3-like 2 (pseudogene)
ENSG00000254665.1	1.21	0.79	0.93	0.87	0.55	0.76	RP11-152H18.3	chr11	lncRNA	--
ENSG00000243629.2	0.6	0.73	0.59	1.56	1.81	1.79	LINC00880	chr3	lncRNA	long intergenic non-protein coding RNA 880
ENSG00000198003.12	0.14	0.13	0.11	0.07	0.06	0.1	ODAD3	chr19	protein_coding	outer dynein arm docking complex subunit 3
ENSG00000188833.10	0.15	0.19	0.14	0.11	0.08	0.07	ENTPD8	chr9	protein_coding	ectonucleoside triphosphate diphosphohydrolase 8
ENSG00000272162.1	0.1	0.15	0.05	0.12	0.06	0.13	RP11-637O19.3	chr6	protein_coding	--
ENSG00000183709.8	0	0	0	0.03	0.03	0	IFNL2	chr19	protein_coding	interferon lambda 2
ENSG00000277942.1	0	0	0	0	0	0.41	MIR8075	chr13	miRNA	microRNA 8075
ENSG00000260022.1	0	0.06	0.05	0.06	0	0	LA16c-306A4.1	chr16	lncRNA	--
ENSG00000285730.1	0.03	0.03	0	0	0	0.03	RP1-167A14.3	chr6	lncRNA	--
ENSG00000122970.16	1.06	1.1	0.95	0.95	1.03	0.9	IFT81	chr12	protein_coding	intraflagellar transport 81
ENSG00000227954.7	0	0.01	0	0	0.02	0.01	TARID	chr6	lncRNA	TCF21 antisense RNA inducing promoter demethylation
ENSG00000128815.19	0	0.01	0	0.01	0	0.01	WDFY4	chr10	protein_coding	WDFY family member 4
ENSG00000138398.17	2.16	2.63	2.48	2.64	2.46	2.42	PPIG	chr2	protein_coding	peptidylprolyl isomerase G
ENSG00000100664.11	17.48	18.23	18.1	20.52	20.97	20.6	EIF5	chr14	protein_coding	eukaryotic translation initiation factor 5
ENSG00000184208.12	2.59	2.82	2.9	2.97	2.87	3.04	C22orf46	chr22	transcribed_unitary_pseudogene	chromosome 22 putative open reading frame 46
ENSG00000189042.14	0.9	0.99	1.05	1.01	0.81	0.91	ZNF567	chr19	protein_coding	zinc finger protein 567
ENSG00000143631.11	0.1	0.06	0.05	0.16	0.13	0.1	FLG	chr1	protein_coding	filaggrin
ENSG00000267767.3	0.01	0	0	0	0	0	LINC01801	chr19	lncRNA	long intergenic non-protein coding RNA 1801
ENSG00000139508.15	1.45	1.28	1.54	3.78	4.01	3.9	SLC46A3	chr13	protein_coding	solute carrier family 46 member 3
ENSG00000276445.1	0.21	0.25	0.25	0.28	0.16	0	LLNLR-268E12.1	chr19	lncRNA	--
ENSG00000027869.12	0.05	0.04	0.05	0.14	0.05	0.08	SH2D2A	chr1	protein_coding	SH2 domain containing 2A
ENSG00000252874.2	0.34	0	0	0	0.35	0	Y_RNA	chr11	misc_RNA	--
ENSG00000272347.1	0.02	0.04	0	0	0	0	RP11-43F13.4	chr5	lncRNA	--
ENSG00000162676.12	0.13	0.14	0.1	0.06	0.11	0.08	GFI1	chr1	protein_coding	growth factor independent 1 transcriptional repressor
ENSG00000278389.1	0.14	0.13	0.06	0.22	0.28	0.37	RP11-626G11.6	chr16	lncRNA	--
ENSG00000287356.1	0.01	0.06	0.1	0.03	0.02	0.03	RP11-181G12.8	chr1	lncRNA	--
ENSG00000214331.8	0.15	0.14	0.12	0.09	0.11	0.12	PDPR2P	chr16	transcribed_unprocessed_pseudogene	pyruvate dehydrogenase phosphatase regulatory subunit 2, pseudogene
ENSG00000204525.17	231.61	230.43	235.71	201.35	206.95	204.51	HLA-C	chr6	protein_coding	major histocompatibility complex, class I, C
ENSG00000225697.13	3.79	3.93	3.42	3.99	3.26	3.8	SLC26A6	chr3	protein_coding	solute carrier family 26 member 6
ENSG00000273270.1	1.41	1.19	1.29	0.8	0.96	1	RP11-212P7.2	chr7	lncRNA	--
ENSG00000255495.1	0.09	0.15	0.4	0.4	0.12	0.24	AC145124.2	chr8	lncRNA	--
ENSG00000123496.8	0	0.02	0	0.32	0.54	0.29	IL13RA2	chrX	protein_coding	interleukin 13 receptor subunit alpha 2
ENSG00000267607.1	0.8	0.85	0.73	1.36	1.06	0.9	CTD-2369P2.8	chr19	lncRNA	--
ENSG00000103932.12	2.7	2.6	2.41	2.9	2.55	2.77	RPAP1	chr15	protein_coding	RNA polymerase II associated protein 1
ENSG00000184897.6	78.68	75.69	76.46	83	87.16	90.94	H1-10	chr3	protein_coding	H1.10 linker histone
ENSG00000116688.18	8.27	8.24	7.95	10.15	9.97	9.98	MFN2	chr1	protein_coding	mitofusin 2
ENSG00000172809.13	91.88	96.68	93.22	91.75	94.81	90.89	RPL38	chr17	protein_coding	ribosomal protein L38
ENSG00000178796.13	0.01	0.01	0.03	0.04	0	0	RIIAD1	chr1	protein_coding	regulatory subunit of type II PKA R-subunit domain containing 1
ENSG00000249550.7	0.05	0.06	0.07	0.09	0.09	0.09	LINC01234	chr12	lncRNA	long intergenic non-protein coding RNA 1234
ENSG00000272537.1	0	0	0	0.17	0	0	GS1-166A23.1	chr7	lncRNA	--
ENSG00000161692.18	2.97	2.62	2.83	3.55	3.11	3.54	DBF4B	chr17	protein_coding	DBF4 zinc finger B
ENSG00000124570.21	11.5	11.69	11.78	9.76	10.14	10.22	SERPINB6	chr6	protein_coding	serpin family B member 6
ENSG00000118407.15	0.01	0	0	0	0.01	0.01	FILIP1	chr6	protein_coding	filamin A interacting protein 1
ENSG00000199179.3	0	0	0	0.39	0.38	0	MIRLET7I	chr12	miRNA	microRNA let-7i
ENSG00000154655.16	0	0	0	0.01	0	0	L3MBTL4	chr18	protein_coding	L3MBTL histone methyl-lysine binding protein 4
ENSG00000231414.1	0.4	0.94	0.37	0.42	0	0.64	RPL39P15	chr2	processed_pseudogene	ribosomal protein L39 pseudogene 15
ENSG00000108309.14	0.01	0	0.02	0.03	0.01	0.01	RUNDC3A	chr17	protein_coding	RUN domain containing 3A
ENSG00000178026.13	0.76	0.79	0.71	0.46	0.54	0.46	LRRC75B	chr22	protein_coding	leucine rich repeat containing 75B
ENSG00000278730.1	6.91	7.77	7.19	7.74	7.43	8.52	RP11-147L13.11	chr17	lncRNA	--
ENSG00000272788.1	0.05	0.23	0.27	0.3	0.24	0.15	RP11-674N23.4	chr18	lncRNA	--
ENSG00000231437.3	0.01	0	0	0	0	0	LINC01750	chr1	lncRNA	long intergenic non-protein coding RNA 1750
ENSG00000086300.16	0.64	0.67	0.71	1.07	1.12	0.88	SNX10	chr7	protein_coding	sorting nexin 10
ENSG00000242094.1	0.01	0	0	0	0	0.01	FOXP1-IT1	chr3	lncRNA	FOXP1 intronic transcript 1
ENSG00000232671.6	0.72	1.28	0.96	1.31	1.43	1.27	ZNF687-AS1	chr1	lncRNA	ZNF687 antisense RNA 1
ENSG00000282304.1	0	0.03	0.03	0.1	0.03	0	RP11-1223D19.3	chr2	lncRNA	--
ENSG00000163947.12	3.68	3.54	3.57	3.76	3.33	3.47	ARHGEF3	chr3	protein_coding	Rho guanine nucleotide exchange factor 3
ENSG00000168259.17	6.36	6.97	6.93	6.62	6.95	7.02	DNAJC7	chr17	protein_coding	DnaJ heat shock protein family (Hsp40) member C7
ENSG00000240476.1	25.74	25.31	22.76	34.04	35.5	35.06	LINC00973	chr3	lncRNA	long intergenic non-protein coding RNA 973
ENSG00000116663.11	3.7	4.07	3.69	3.79	4.25	4.03	FBXO6	chr1	protein_coding	F-box protein 6
ENSG00000282840.1	0	0	0.03	0	0	0	GS1-590J6.3	chrX	lncRNA	--
ENSG00000188825.14	0.14	0.17	0.16	0.18	0.18	0.16	LINC00910	chr17	lncRNA	long intergenic non-protein coding RNA 910
ENSG00000230630.5	0	0	0	0.01	0.01	0	DNM3OS	chr1	lncRNA	DNM3 opposite strand/antisense RNA
ENSG00000169962.5	0.04	0.06	0.07	0.07	0.13	0.1	TAS1R3	chr1	protein_coding	taste 1 receptor member 3
ENSG00000101605.13	0	0.01	0	0	0	0.01	MYOM1	chr18	protein_coding	myomesin 1
ENSG00000160229.13	0.29	0.21	0.25	0.31	0.25	0.26	ZNF66	chr19	protein_coding	zinc finger protein 66
ENSG00000256427.2	0.02	0.02	0	0	0	0	RP11-118B22.2	chr12	lncRNA	--
ENSG00000074755.15	1.57	1.51	1.61	1.54	1.6	1.53	ZZEF1	chr17	protein_coding	zinc finger ZZ-type and EF-hand domain containing 1
ENSG00000260804.3	1	0.85	1.15	1.01	1.08	1.02	LINC01963	chr2	lncRNA	long intergenic non-protein coding RNA 1963
ENSG00000203857.10	0.19	0.19	0.18	0.03	0.01	0.03	HSD3B1	chr1	protein_coding	hydroxy-delta-5-steroid dehydrogenase, 3 beta- and steroid delta-isomerase 1
ENSG00000273033.2	0.88	0.67	0.78	0.76	0.61	0.66	LINC02035	chr3	lncRNA	long intergenic non-protein coding RNA 2035
ENSG00000198925.12	3.79	3.54	4.04	4	4.17	4.07	ATG9A	chr2	protein_coding	autophagy related 9A
ENSG00000237133.1	0	0.09	0.17	0.29	0.19	0	RASGRP3-AS1	chr2	lncRNA	RASGRP3 antisense RNA 1
ENSG00000230590.11	0.24	0.26	0.2	0.21	0.18	0.17	FTX	chrX	lncRNA	FTX transcript, XIST regulator
ENSG00000100629.17	0.4	0.4	0.48	0.62	0.6	0.51	CEP128	chr14	protein_coding	centrosomal protein 128
ENSG00000136457.10	0	0	0	0	0.02	0	CHAD	chr17	protein_coding	chondroadherin
ENSG00000267774.2	0.46	0.08	0.19	0.66	0.44	0.34	RP11-2N1.2	chr18	lncRNA	--
ENSG00000221091.1	0	0.2	0	0	0	0	MIR1302-5	chr20	miRNA	microRNA 1302-5
ENSG00000141401.12	7.16	7.37	7.98	5.92	5.92	6.81	IMPA2	chr18	protein_coding	inositol monophosphatase 2
ENSG00000283103.3	4.87	4.83	4.64	4.38	4.38	4.1	LLNLR-245B6.1	chr19	lncRNA	--
ENSG00000102805.16	0.78	0.79	0.7	0.8	0.84	0.69	CLN5	chr13	protein_coding	CLN5 intracellular trafficking protein
ENSG00000113749.7	0.01	0.01	0.01	0.01	0	0.02	HRH2	chr5	protein_coding	histamine receptor H2
ENSG00000279971.1	0	0.02	0	0	0	0	CTD-2553L13.5	chr19	TEC	--
ENSG00000104327.7	0	0	0	0.21	0.22	0.15	CALB1	chr8	protein_coding	calbindin 1
ENSG00000255992.1	0.29	0.14	0.61	0.68	0.74	0.62	RP11-417L19.4	chr12	lncRNA	--
ENSG00000081051.8	0	0	0	0	0.02	0.02	AFP	chr4	protein_coding	alpha fetoprotein
ENSG00000107295.10	0	0	0	0	0.01	0	SH3GL2	chr9	protein_coding	SH3 domain containing GRB2 like 2, endophilin A1
ENSG00000241529.3	0	0	0	0	0	0.11	RN7SL767P	chr3	misc_RNA	RNA, 7SL, cytoplasmic 767, pseudogene
ENSG00000261167.1	0.14	0.15	0.26	0.28	0.34	0.21	RP11-517B11.7	chr3	lncRNA	--
ENSG00000186007.10	0.06	0	0.03	0	0	0.03	LEMD1	chr1	protein_coding	LEM domain containing 1
ENSG00000130812.11	0.42	0.34	0.41	0.46	0.38	0.24	ANGPTL6	chr19	protein_coding	angiopoietin like 6
ENSG00000213123.11	1.54	1.72	1.5	0.83	0.94	0.85	DYNLT2B	chr3	protein_coding	dynein light chain Tctex-type 2B
ENSG00000229256.1	0	0	0	0.03	0	0	ST13P13	chr10	processed_pseudogene	ST13, Hsp70 interacting protein pseudogene 13
ENSG00000112742.10	5.74	6.46	6.63	6.95	7.09	6.28	TTK	chr6	protein_coding	TTK protein kinase
ENSG00000229539.1	0.56	1	1.44	1.18	1	0.45	PANK2-AS1	chr20	lncRNA	PANK2 antisense RNA 1
ENSG00000266680.1	0.13	0.17	0.12	0.12	0.31	0.07	RP5-1148A21.3	chr6	lncRNA	--
ENSG00000183943.6	1.65	1.79	1.66	1.31	1.3	1.29	PRKX	chrX	protein_coding	protein kinase X-linked
ENSG00000259020.3	0.1	0	0	0.1	0	0	RP11-529H20.3	chr14	processed_pseudogene	--
ENSG00000260979.1	0.15	0	0.13	0	0.15	0	USP7-AS1	chr16	lncRNA	USP7 antisense RNA 1
ENSG00000233108.1	0	0	0.05	0	0	0	GLCCI1-DT	chr7	lncRNA	GLCCI1 divergent transcript
ENSG00000139574.9	0.65	0.88	1.08	0.92	0.85	0.54	NPFF	chr12	protein_coding	neuropeptide FF-amide peptide precursor
ENSG00000271367.1	0.11	0.32	0.11	0.18	0.06	0.12	RP3-483K16.4	chr6	lncRNA	--
ENSG00000261575.2	0.78	0.78	1.07	0.63	0.51	0.64	RP11-259G18.1	chr17	transcribed_unprocessed_pseudogene	--
ENSG00000288063.1	0	0	0	0	0	0.02	RP11-413B21.4	chr3	lncRNA	--
ENSG00000253774.1	0.05	0.05	0.1	0	0	0.06	CTD-3023L14.1	chr8	lncRNA	--
ENSG00000205155.8	46.37	48.17	47.85	49.96	50.45	49.59	PSENEN	chr19	protein_coding	presenilin enhancer, gamma-secretase subunit
ENSG00000197037.11	1.67	1.53	1.61	1.83	1.79	2.05	ZSCAN25	chr7	protein_coding	zinc finger and SCAN domain containing 25
ENSG00000073910.23	0.02	0.02	0.02	0.03	0.02	0.02	FRY	chr13	protein_coding	FRY microtubule binding protein
ENSG00000287539.1	0.11	0.1	0.36	0.22	0.14	0.08	RP11-323N12.6	chr17	lncRNA	--
ENSG00000066027.12	7.08	6.85	6.99	7.62	7.7	7.53	PPP2R5A	chr1	protein_coding	protein phosphatase 2 regulatory subunit B'alpha
ENSG00000180902.18	1.22	1.45	1.34	1.03	1.01	0.96	D2HGDH	chr2	protein_coding	D-2-hydroxyglutarate dehydrogenase
ENSG00000183077.15	4.46	3.75	4.54	3.91	4.32	4.28	AFMID	chr17	protein_coding	arylformamidase
ENSG00000267446.1	0.32	0	0.07	0	0	0	CTB-39G8.2	chr17	lncRNA	--
ENSG00000147144.13	2.57	2.2	2.17	3.49	3.05	3.23	CCDC120	chrX	protein_coding	coiled-coil domain containing 120
ENSG00000164176.13	16.26	15.52	14.37	7.01	7.15	6.84	EDIL3	chr5	protein_coding	EGF like repeats and discoidin domains 3
ENSG00000162004.19	0.24	0.21	0.22	0.19	0.29	0.15	CCDC78	chr16	protein_coding	coiled-coil domain containing 78
ENSG00000260619.1	0	0	0.02	0	0	0	RP11-775C24.3	chr15	lncRNA	--
ENSG00000280744.1	0.66	0.8	0.44	0.29	0.86	0.7	LINC01173	chr2	lncRNA	long intergenic non-protein coding RNA 1173
ENSG00000268818.2	0	0	0.03	0.08	0.04	0	CITF22-62D4.1	chr22	lncRNA	--
ENSG00000176101.12	89.17	91.93	94.34	99.48	101.21	101.52	SSNA1	chr9	protein_coding	SS nuclear autoantigen 1
ENSG00000144120.13	5.02	5.38	6.46	5.89	6.63	5.67	TMEM177	chr2	protein_coding	transmembrane protein 177
ENSG00000101337.16	16.59	16.03	16.47	18.47	18.07	19.06	TM9SF4	chr20	protein_coding	transmembrane 9 superfamily member 4
ENSG00000163126.15	1.44	1.58	1.61	1.84	1.97	1.75	ANKRD23	chr2	protein_coding	ankyrin repeat domain 23
ENSG00000105352.10	0	0	0.02	0.02	0	0.02	CEACAM4	chr19	protein_coding	CEA cell adhesion molecule 4
ENSG00000275494.1	1.68	1.26	1.35	1.82	1.48	3.16	RP11-266L9.8	chr16	lncRNA	--
ENSG00000151893.15	4.72	4.88	4.68	5.31	5	4.77	CACUL1	chr10	protein_coding	CDK2 associated cullin domain 1
ENSG00000172243.18	0.04	0.04	0.01	0.04	0.06	0.11	CLEC7A	chr12	protein_coding	C-type lectin domain containing 7A
ENSG00000273709.1	0	0	0	0	0.17	0	U2	chr17	snRNA	--
ENSG00000179526.17	25.74	26.1	27.62	28.25	27.68	29.12	SHARPIN	chr8	protein_coding	SHANK associated RH domain interactor
ENSG00000254486.1	0.02	0	0	0.02	0.06	0.03	LINC02547	chr11	lncRNA	long intergenic non-protein coding RNA 2547
ENSG00000188529.15	7.09	7.35	6.92	7.62	7.25	7.42	SRSF10	chr1	protein_coding	serine and arginine rich splicing factor 10
ENSG00000144909.8	2.08	2.14	1.67	2.01	2.08	1.88	OSBPL11	chr3	protein_coding	oxysterol binding protein like 11
ENSG00000138778.13	1.42	1.48	1.93	2.36	1.99	2.07	CENPE	chr4	protein_coding	centromere protein E
ENSG00000138381.10	19.6	19.92	19.88	21.01	20.89	20.24	ASNSD1	chr2	protein_coding	asparagine synthetase domain containing 1
ENSG00000154654.15	0.09	0.06	0.07	0.01	0.02	0.02	NCAM2	chr21	protein_coding	neural cell adhesion molecule 2
ENSG00000235111.1	0	0	0.01	0	0	0	RP1-29C18.8	chr22	lncRNA	--
ENSG00000198689.13	2.83	2.82	2.7	2.92	2.82	2.82	SLC9A6	chrX	protein_coding	solute carrier family 9 member A6
ENSG00000254233.1	0	0	0	0	0.02	0	LINC02365	chr4	lncRNA	long intergenic non-protein coding RNA 2365
ENSG00000163041.13	33.74	34.16	34.1	30.76	32.03	32.97	H3-3A	chr1	protein_coding	H3.3 histone A
ENSG00000287918.1	0.05	0.03	0.03	0.05	0.05	0.03	RP5-892C22.1	chrX	lncRNA	--
ENSG00000169136.12	22.78	21.25	24.21	19.64	19.11	19.46	ATF5	chr19	protein_coding	activating transcription factor 5
ENSG00000096968.14	0.32	0.29	0.3	0.4	0.44	0.47	JAK2	chr9	protein_coding	Janus kinase 2
ENSG00000175518.8	0	0	0.01	0.03	0	0	UBQLNL	chr11	protein_coding	ubiquilin like
ENSG00000162783.11	47.66	45.01	44.76	43.18	45.04	46.47	IER5	chr1	protein_coding	immediate early response 5
ENSG00000197813.6	0.13	0.37	0.37	0.05	0.13	0	CTC-301O7.4	chr19	lncRNA	--
ENSG00000273269.3	20.84	25.09	27.41	25.5	24.32	24.81	RP11-761B3.1	chr2	protein_coding	--
ENSG00000286086.1	0.06	0.11	0.06	0.06	0.06	0.06	RP11-110C15.5	chr3	lncRNA	--
ENSG00000182685.8	0.93	1.44	0.86	0.91	0.82	1.18	BRICD5	chr16	protein_coding	BRICHOS domain containing 5
ENSG00000265261.1	0	0	0	0.01	0	0	RP11-162A12.3	chr18	processed_pseudogene	--
ENSG00000073712.15	5.64	5.58	5.63	5.69	6.04	5.72	FERMT2	chr14	protein_coding	FERM domain containing kindlin 2
ENSG00000256802.2	1.42	1.3	1.57	3.61	3.67	4.18	RP11-680F8.1	chr15	lncRNA	--
ENSG00000228665.2	0	0.12	0.11	0.26	0.12	0	RP11-20O24.1	chr1	processed_pseudogene	--
ENSG00000105523.4	0	0	0.02	0.18	0.09	0.07	FAM83E	chr19	protein_coding	family with sequence similarity 83 member E
ENSG00000213735.2	0	0	0.05	0.06	0	0	ANAPC10P1	chr1	processed_pseudogene	anaphase promoting complex subunit 10 pseudogene 1
ENSG00000125850.11	0.01	0	0	0.1	0.23	0.14	OVOL2	chr20	protein_coding	ovo like zinc finger 2
ENSG00000230702.1	0	0	0.24	0	0	0.09	RPL31P30	chr2	processed_pseudogene	ribosomal protein L31 pseudogene 30
ENSG00000172974.11	0.67	0.6	0.52	0.55	0.68	0.75	VDAC2P5	chr2	processed_pseudogene	VDAC2 pseudogene 5
ENSG00000067221.14	1.71	1.7	1.56	2.16	2.33	2.2	STOML1	chr15	protein_coding	stomatin like 1
ENSG00000165171.11	1.86	1.92	1.81	1.34	2.17	2.26	METTL27	chr7	protein_coding	methyltransferase like 27
ENSG00000110344.10	7.92	7.63	8.11	8.41	8.86	8.86	UBE4A	chr11	protein_coding	ubiquitination factor E4A
ENSG00000257210.1	0	0	0	0	0.07	0.07	NACAP8	chr12	processed_pseudogene	NACA pseudogene 8
ENSG00000187634.13	0.45	0.32	0.39	0.38	0.36	0.36	SAMD11	chr1	protein_coding	sterile alpha motif domain containing 11
ENSG00000155380.13	0.08	0.06	0.09	0.15	0.12	0.17	SLC16A1	chr1	protein_coding	solute carrier family 16 member 1
ENSG00000203785.9	0.46	0.4	0.16	0.35	0.09	0.23	SPRR2E	chr1	protein_coding	small proline rich protein 2E
ENSG00000253309.7	0.01	0	0.04	0	0.02	0	SERPINE3	chr13	protein_coding	serpin family E member 3
ENSG00000234709.2	0	0	0.11	0.04	0.08	0	UPF3AP3	chr9	transcribed_processed_pseudogene	UPF3A pseudogene 3
ENSG00000286176.2	0.25	0.3	0.26	0.26	0.12	0.14	RP11-1406H17.2	chr4	lncRNA	--
ENSG00000223504.1	0	0	0	0	0.06	0	RP11-542F9.1	chr6	lncRNA	--
ENSG00000288579.1	0.14	0	0.05	0.1	0	0	RP11-15G6.1	chr5	processed_pseudogene	--
ENSG00000231948.2	0	0.05	0.1	0.05	0	0	HS1BP3-IT1	chr2	lncRNA	HS1BP3 intronic transcript 1
ENSG00000135502.19	0	0.01	0.01	0	0.01	0	SLC26A10	chr12	transcribed_unitary_pseudogene	solute carrier family 26 member 10
ENSG00000167754.13	0.04	0.02	0.03	0.02	0.02	0	KLK5	chr19	protein_coding	kallikrein related peptidase 5
ENSG00000170324.21	0.01	0	0	0	0	0	FRMPD2	chr10	protein_coding	FERM and PDZ domain containing 2
ENSG00000233178.7	0.01	0.01	0.01	0	0.01	0.01	RP11-88I18.2	chr9	lncRNA	--
ENSG00000185252.19	0.95	1.14	0.83	0.96	1.05	0.99	ZNF74	chr22	protein_coding	zinc finger protein 74
ENSG00000168772.11	0.02	0.03	0	0.08	0.04	0.05	CXXC4	chr4	protein_coding	CXXC finger protein 4
ENSG00000213588.6	5.42	6.09	5.48	7.84	7.26	7.62	ZBTB9	chr6	protein_coding	zinc finger and BTB domain containing 9
ENSG00000214026.11	14.88	15.46	14.08	13.76	15.15	14.67	MRPL23	chr11	protein_coding	mitochondrial ribosomal protein L23
ENSG00000071189.21	0.94	1.01	1.01	0.91	0.9	0.89	SNX13	chr7	protein_coding	sorting nexin 13
ENSG00000259956.2	7.38	7.31	7.78	11.7	12.13	12.4	RBM15B	chr3	protein_coding	RNA binding motif protein 15B
ENSG00000071859.15	68.87	68.74	68.77	68.58	68.97	69.38	FAM50A	chrX	protein_coding	family with sequence similarity 50 member A
ENSG00000215374.6	0.03	0.02	0.03	0.04	0.03	0.03	FAM66B	chr8	lncRNA	family with sequence similarity 66 member B
ENSG00000233328.3	0	0.14	0.07	0.08	0.15	0.23	PFN1P1	chr1	processed_pseudogene	profilin 1 pseudogene 1
ENSG00000164056.11	3.21	3.59	2.78	2.12	2.41	2.54	SPRY1	chr4	protein_coding	sprouty RTK signaling antagonist 1
ENSG00000171643.14	0.06	0.06	0.01	0	0.05	0.03	S100Z	chr5	protein_coding	S100 calcium binding protein Z
ENSG00000269888.1	0.62	0.24	0.12	0.26	0.51	0.4	RP11-3P17.5	chr3	lncRNA	--
ENSG00000264717.5	0	0.03	0.04	0	0	0	NPY4R2	chr10	protein_coding	neuropeptide Y receptor Y4-2
ENSG00000268324.2	0.03	0.04	0.09	0.01	0.05	0.03	LRRC2-AS1	chr3	lncRNA	LRRC2 antisense RNA 1
ENSG00000287882.1	0	0	0.02	0	0	0	RP11-447M4.2	chr3	lncRNA	--
ENSG00000280789.2	1.58	1.36	1.27	1.46	1.55	1.5	PAGR1	chr16	protein_coding	PAXIP1 associated glutamate rich protein 1
ENSG00000108559.12	9.94	9.88	10.32	10.12	10.83	11.08	NUP88	chr17	protein_coding	nucleoporin 88
ENSG00000104976.12	18.49	17.42	17.36	22.52	21.86	22.91	SNAPC2	chr19	protein_coding	small nuclear RNA activating complex polypeptide 2
ENSG00000159322.18	5.76	5.48	5.12	5.12	5.24	5	ADPGK	chr15	protein_coding	ADP dependent glucokinase
ENSG00000162772.17	0.72	0.77	0.77	1.04	1.02	1.21	ATF3	chr1	protein_coding	activating transcription factor 3
ENSG00000257556.2	0.2	0.2	0.28	0.23	0.19	0.19	LINC02298	chr14	lncRNA	long intergenic non-protein coding RNA 2298
ENSG00000166311.10	31.26	32.12	31.95	30.01	31.62	32.09	SMPD1	chr11	protein_coding	sphingomyelin phosphodiesterase 1
ENSG00000112812.16	0.22	0.17	0.19	0.5	0.62	0.51	PRSS16	chr6	protein_coding	serine protease 16
ENSG00000183087.15	53.68	54.1	54.59	51.47	51.53	51.62	GAS6	chr13	protein_coding	growth arrest specific 6
ENSG00000146700.9	0.34	0.49	0.26	0.3	0.44	0.34	SSC4D	chr7	protein_coding	scavenger receptor cysteine rich family member with 4 domains
ENSG00000259788.1	0	0.03	0	0	0	0	RP11-359K18.3	chr1	lncRNA	--
ENSG00000105948.13	2.27	2.22	2.47	2.11	2.06	1.88	TTC26	chr7	protein_coding	tetratricopeptide repeat domain 26
ENSG00000157870.17	13.21	12.63	13.61	12.97	13.18	14.03	PRXL2B	chr1	protein_coding	peroxiredoxin like 2B
ENSG00000102879.16	0.4	0.44	0.46	0.83	0.65	0.73	CORO1A	chr16	protein_coding	coronin 1A
ENSG00000082458.12	1.45	1.61	1.37	2.54	2.27	2.42	DLG3	chrX	protein_coding	discs large MAGUK scaffold protein 3
ENSG00000124882.4	1.42	1.5	1.27	3.67	4.06	3.29	EREG	chr4	protein_coding	epiregulin
ENSG00000129993.15	0	0	0.01	0.01	0.01	0.02	CBFA2T3	chr16	protein_coding	CBFA2/RUNX1 partner transcriptional co-repressor 3
ENSG00000101342.10	0.11	0.07	0.08	0.09	0.12	0.05	TLDC2	chr20	protein_coding	TBC/LysM-associated domain containing 2
ENSG00000175206.10	0	0.03	0	0.03	0	0	NPPA	chr1	protein_coding	natriuretic peptide A
ENSG00000102243.13	0.02	0	0	0	0	0	VGLL1	chrX	protein_coding	vestigial like family member 1
ENSG00000116288.13	86.32	86.48	87.18	86.62	92.25	87.7	PARK7	chr1	protein_coding	Parkinsonism associated deglycase
ENSG00000240891.8	0.09	0.14	0.09	0.23	0.22	0.2	PLCXD2	chr3	protein_coding	phosphatidylinositol specific phospholipase C X domain containing 2
ENSG00000264023.1	0	0.22	0.21	0	0	0.16	RP11-728E14.2	chr17	lncRNA	--
ENSG00000100442.11	43.15	46.67	45.54	38.25	38.76	37.42	FKBP3	chr14	protein_coding	FKBP prolyl isomerase 3
ENSG00000244115.1	50.75	52.85	52.19	43.68	45.58	41.8	DNAJC25-GNG10	chr9	protein_coding	DNAJC25-GNG10 readthrough
ENSG00000136720.7	5.92	5.63	5.6	4.93	4.95	5.13	HS6ST1	chr2	protein_coding	heparan sulfate 6-O-sulfotransferase 1
ENSG00000229950.1	1.34	1.14	1.5	1.38	1.12	1.1	TFAP2A-AS1	chr6	lncRNA	TFAP2A antisense RNA 1
ENSG00000269524.1	0.17	0	0	0	0	0	CTB-83J4.1	chr19	lncRNA	--
ENSG00000226029.1	0.02	0.02	0.02	0	0.01	0.01	LINC01772	chr1	lncRNA	long intergenic non-protein coding RNA 1772
ENSG00000265458.2	0.73	0.59	0.74	1.12	0.78	0.91	NARF-AS2	chr17	lncRNA	NARF antisense RNA 2
ENSG00000231683.6	0.01	0	0	0	0	0	RP1-27K12.2	chr6	lncRNA	--
ENSG00000103510.20	2.75	2.45	2.63	2.84	2.86	2.82	KAT8	chr16	protein_coding	lysine acetyltransferase 8
ENSG00000237493.3	0	0	0.1	0.27	0.05	0.16	RP11-603J24.7	chr12	processed_pseudogene	--
ENSG00000255348.1	0.46	0.35	0	0.29	0.09	0.3	RP11-700F16.3	chr11	lncRNA	--
ENSG00000154889.17	0.66	0.65	0.61	0.4	0.34	0.27	MPPE1	chr18	protein_coding	metallophosphoesterase 1
ENSG00000281181.1	8.56	5.62	4	24.52	8.92	9.26	CH507-513H4.3	chr21	lncRNA	--
ENSG00000134240.12	0	0	0	0	0	0.01	HMGCS2	chr1	protein_coding	3-hydroxy-3-methylglutaryl-CoA synthase 2
ENSG00000280387.1	0	0	0.02	0.05	0	0.03	RP5-1153D9.5	chr20	TEC	--
ENSG00000175294.6	2.56	2.41	2.6	2.11	2.42	2.43	CATSPER1	chr11	protein_coding	cation channel sperm associated 1
ENSG00000145908.13	0.05	0.04	0.03	0.11	0.05	0.08	ZNF300	chr5	protein_coding	zinc finger protein 300
ENSG00000237882.1	0	0.06	0	0	0	0.07	PPIAP13	chr10	processed_pseudogene	peptidylprolyl isomerase A pseudogene 13
ENSG00000234469.4	0	0.12	0.03	0.03	0	0	CLDN34	chrX	protein_coding	claudin 34
ENSG00000251396.7	0	0.01	0	0.01	0.01	0.02	LINC01301	chr8	lncRNA	long intergenic non-protein coding RNA 1301
ENSG00000188549.12	12.44	11.95	10.71	7.33	6.82	6.92	CCDC9B	chr15	protein_coding	coiled-coil domain containing 9B
ENSG00000078246.17	6.54	6.48	5.96	6.34	6.18	6.67	TULP3	chr12	protein_coding	TUB like protein 3
ENSG00000213625.9	13.64	14.28	13.92	17.28	17.32	17.37	LEPROT	chr1	protein_coding	leptin receptor overlapping transcript
ENSG00000189060.6	71.85	74.77	76.24	87.13	86.91	87.79	H1-0	chr22	protein_coding	H1.0 linker histone
ENSG00000167315.18	9.32	8.4	8.96	9.6	9.26	10	ACAA2	chr18	protein_coding	acetyl-CoA acyltransferase 2
ENSG00000229637.4	0.05	0	0.09	0.1	0.39	0.21	PRAC2	chr17	protein_coding	PRAC2 small nuclear protein
ENSG00000249650.1	0.16	0	0	0	0	0	RP11-310P5.1	chr5	lncRNA	--
ENSG00000185163.10	2.7	2.67	2.49	3.09	2.79	2.95	DDX51	chr12	protein_coding	DEAD-box helicase 51
ENSG00000123411.15	0.36	0.38	0.4	0.51	0.41	0.38	IKZF4	chr12	protein_coding	IKAROS family zinc finger 4
ENSG00000235338.1	0	0	0.03	0	0	0	DUSP5P2	chr3	processed_pseudogene	dual specificity phosphatase 5 pseudogene 2
ENSG00000107338.10	3.99	4.09	4.56	5.33	5.07	5.29	SHB	chr9	protein_coding	SH2 domain containing adaptor protein B
ENSG00000226800.5	0.58	0.6	0.72	0.88	0.77	0.66	CACTIN-AS1	chr19	lncRNA	CACTIN antisense RNA 1
ENSG00000251155.2	0	0	0	0	0	0.18	SEPTIN14P4	chr4	processed_pseudogene	septin 14 pseudogene 4
ENSG00000138207.14	0	0	0	0	0	0.02	RBP4	chr10	protein_coding	retinol binding protein 4
ENSG00000206560.12	5.21	5.83	5.67	5.47	5.35	5.13	ANKRD28	chr3	protein_coding	ankyrin repeat domain 28
ENSG00000137474.22	0.06	0.09	0.07	0.06	0.07	0.08	MYO7A	chr11	protein_coding	myosin VIIA
ENSG00000182318.6	1.2	1.25	1.09	1.14	1.04	1.33	ZSCAN22	chr19	protein_coding	zinc finger and SCAN domain containing 22
ENSG00000128973.13	3.06	2.92	3.49	3.54	3.47	3.23	CLN6	chr15	protein_coding	CLN6 transmembrane ER protein
ENSG00000276386.1	0.01	0.04	0.03	0.03	0.02	0.01	CNTNAP3P2	chr9	unprocessed_pseudogene	CNTNAP3 pseudogene 2
ENSG00000169239.13	0.73	0.81	0.82	0.79	0.74	0.75	CA5B	chrX	protein_coding	carbonic anhydrase 5B
ENSG00000254350.1	0	0	0	0.09	0	0	RP11-542A14.1	chr5	lncRNA	--
ENSG00000075886.11	0	0	0	0	0	0.02	TUBA3D	chr2	protein_coding	tubulin alpha 3d
ENSG00000087086.15	4929.14	4830.97	4974.17	3583.43	3636.82	3651.8	FTL	chr19	protein_coding	ferritin light chain
ENSG00000128923.11	2.31	2.29	2.11	1.46	1.49	1.25	MINDY2	chr15	protein_coding	MINDY lysine 48 deubiquitinase 2
ENSG00000028116.18	2.62	2.91	2.48	4.36	4.49	4.24	VRK2	chr2	protein_coding	VRK serine/threonine kinase 2
ENSG00000276596.1	0	0	0	0	0.17	0	U2	chr17	snRNA	--
ENSG00000117280.13	11.02	11.43	11.37	10.03	9.82	10.11	RAB29	chr1	protein_coding	RAB29, member RAS oncogene family
ENSG00000265496.5	0.16	0.2	0.1	0.06	0.11	0.06	MIR1539	chr18	lncRNA	microRNA 1539
ENSG00000079112.10	0	0.02	0.01	0.03	0.02	0	CDH17	chr8	protein_coding	cadherin 17
ENSG00000099985.4	0.1	0.03	0.01	0.05	0.01	0.05	OSM	chr22	protein_coding	oncostatin M
ENSG00000258256.1	0.1	0.09	0	0.03	0.03	0.05	RP11-219B4.5	chr8	lncRNA	--
ENSG00000151388.11	3.75	3.83	3.8	3.94	3.67	3.81	ADAMTS12	chr5	protein_coding	ADAM metallopeptidase with thrombospondin type 1 motif 12
ENSG00000077984.6	59.24	62.88	65.19	28.86	27.01	30.16	CST7	chr20	protein_coding	cystatin F
ENSG00000128881.17	0.71	0.65	0.8	0.92	0.75	0.69	TTBK2	chr15	protein_coding	tau tubulin kinase 2
ENSG00000213228.5	0.01	0.01	0	0	0	0	RPL12P38	chr17	transcribed_processed_pseudogene	ribosomal protein L12 pseudogene 38
ENSG00000181924.7	43.99	43.77	43.17	49.21	49.75	50.73	COA4	chr11	protein_coding	cytochrome c oxidase assembly factor 4 homolog
ENSG00000231329.8	0	0.01	0	0.01	0.01	0	RP1-225E12.2	chr6	lncRNA	--
ENSG00000273113.1	0	0.15	0.14	0.16	0.2	0.12	RP11-367H1.1	chr2	lncRNA	--
ENSG00000108349.17	10.36	10.03	9.74	9.85	9.48	9.57	CASC3	chr17	protein_coding	CASC3 exon junction complex subunit
ENSG00000256862.3	0	0	0	0.02	0	0	PARP11-AS1	chr12	lncRNA	PARP11 antisense RNA 1
ENSG00000226310.1	0	0.09	0	0	0.19	0.4	RP3-323P24.3	chrX	lncRNA	--
ENSG00000287839.1	3.67	3.33	3.2	4.53	4.26	4	RP11-29H23.8	chr1	lncRNA	--
ENSG00000226649.1	0	0	0	0	0.07	0	AC019118.4	chr2	lncRNA	--
ENSG00000157992.12	0.04	0.06	0.12	0.23	0.07	0.17	KRTCAP3	chr2	protein_coding	keratinocyte associated protein 3
ENSG00000221500.1	0.41	1.16	1.52	0.85	1.24	3.05	SNORD100	chr6	snoRNA	small nucleolar RNA, C/D box 100
ENSG00000235448.3	0.13	0.08	0.1	0.17	0.28	0.26	LURAP1L-AS1	chr9	lncRNA	LURAP1L antisense RNA 1
ENSG00000267152.1	1.14	1.01	0.7	0.55	0.51	0.56	CTD-2528L19.6	chr19	lncRNA	--
ENSG00000128805.15	5.89	5.24	5.41	4.11	4.09	4.23	ARHGAP22	chr10	protein_coding	Rho GTPase activating protein 22
ENSG00000105894.12	1.09	0.74	0.98	1.1	1.28	1.29	PTN	chr7	protein_coding	pleiotrophin
ENSG00000225643.1	0.13	0.3	0.3	0.34	0.13	0.34	RP11-70P17.1	chr1	lncRNA	--
ENSG00000280798.1	3.93	3.4	3.97	3.22	3.38	3.8	LINC00294	chr11	lncRNA	long intergenic non-protein coding RNA 294
ENSG00000116649.10	83.69	80.53	84.57	112.98	112.61	120.28	SRM	chr1	protein_coding	spermidine synthase
ENSG00000127081.14	0.28	0.47	0.45	0.34	0.42	0.48	ZNF484	chr9	protein_coding	zinc finger protein 484
ENSG00000278192.1	0.06	0.05	0	0.03	0.02	0.24	RP5-1056H1.2	chr20	lncRNA	--
ENSG00000238184.1	0.28	0.25	0.26	0.23	0.25	0.19	CD81-AS1	chr11	lncRNA	CD81 antisense RNA 1
ENSG00000286940.1	0.21	0.27	0.31	0.31	0.43	0.26	MICB-DT	chr6	lncRNA	MICB divergent transcript
ENSG00000278986.1	0.61	0.7	0.57	1.05	1.04	0.83	RP11-723J4.3	chr18	TEC	--
ENSG00000198673.11	0.02	0.02	0.02	0.04	0.06	0.02	TAFA2	chr12	protein_coding	TAFA chemokine like family member 2
ENSG00000286271.2	0.01	0	0	0	0	0	CTD-2201E18.6	chr5	lncRNA	--
ENSG00000123989.14	26.85	24.9	27.49	28.84	31.05	31.23	CHPF	chr2	protein_coding	chondroitin polymerizing factor
ENSG00000214114.9	6.62	6.39	5.18	7.38	8.47	8.23	MYCBP	chr1	protein_coding	MYC binding protein
ENSG00000244280.1	0.04	0.02	0	0	0	0	ECEL1P2	chr2	transcribed_unprocessed_pseudogene	endothelin converting enzyme like 1 pseudogene 2
ENSG00000266010.2	0.97	0.75	0.84	0.79	0.66	0.66	GATA6-AS1	chr18	lncRNA	GATA6 antisense RNA 1 (head to head)
ENSG00000284607.1	0.02	0	0.04	0	0.01	0.01	CTA-14H9.7	chr6	lncRNA	--
ENSG00000213104.3	0.07	0.07	0.03	0.07	0	0	NPM1P46	chr2	processed_pseudogene	nucleophosmin 1 pseudogene 46
ENSG00000008283.16	14.48	13.77	15.05	14.45	15.07	15.58	CYB561	chr17	protein_coding	cytochrome b561
ENSG00000205710.4	0.1	0.09	0.11	0.1	0.08	0.19	C17orf107	chr17	protein_coding	chromosome 17 open reading frame 107
ENSG00000165389.7	25.43	26.8	24.37	23.84	24.83	22.74	SPTSSA	chr14	protein_coding	serine palmitoyltransferase small subunit A
ENSG00000222071.1	0	0	0.72	0.41	0	0	MIR1915	chr10	miRNA	microRNA 1915
ENSG00000233024.7	0.77	0.9	1.05	0.85	0.77	0.73	NPIPA9	chr16	protein_coding	nuclear pore complex interacting protein family, member A9
ENSG00000251209.9	0	0	0	0	0	0.01	LINC00923	chr15	lncRNA	long intergenic non-protein coding RNA 923
ENSG00000149923.14	36.63	34.71	37.79	37.43	39.78	39.88	PPP4C	chr16	protein_coding	protein phosphatase 4 catalytic subunit
ENSG00000260751.2	0.67	0.37	0.31	0.13	0.18	0.16	CTD-2196E14.6	chr16	lncRNA	--
ENSG00000261315.2	0.01	0	0	0	0	0	LARP4P	chr15	transcribed_processed_pseudogene	LARP4 pseudogene
ENSG00000196422.11	4.73	4.65	4.09	4.77	4.49	4.6	PPP1R26	chr9	protein_coding	protein phosphatase 1 regulatory subunit 26
ENSG00000263020.6	6.02	5.55	4.85	6.01	5.17	6.13	XXbac-BPG32J3.22	chr6	protein_coding	--
ENSG00000075073.15	0.06	0.07	0.08	0.14	0.08	0.11	TACR2	chr10	protein_coding	tachykinin receptor 2
ENSG00000123838.11	0.03	0	0	0.01	0	0	C4BPA	chr1	protein_coding	complement component 4 binding protein alpha
ENSG00000226435.10	0	0	0	0.02	0	0	ANKRD18DP	chr3	transcribed_unprocessed_pseudogene	ankyrin repeat domain 18D, pseudogene
ENSG00000120158.12	1.46	1.48	1.58	1.95	1.99	2.11	RCL1	chr9	protein_coding	RNA terminal phosphate cyclase like 1
ENSG00000164047.6	0.04	0	0.35	0.04	0.04	0	CAMP	chr3	protein_coding	cathelicidin antimicrobial peptide
ENSG00000172380.6	20.01	20.61	19.81	22.2	22.83	22.04	GNG12	chr1	protein_coding	G protein subunit gamma 12
ENSG00000234405.2	0.29	0.21	0.24	0.23	0.2	0.15	LL0XNC01-250H12.3	chrX	lncRNA	--
ENSG00000121058.5	5.18	5.72	5.42	5.3	5.41	4.91	COIL	chr17	protein_coding	coilin
ENSG00000197594.14	3.54	3.89	3.64	2.45	2.74	2.47	ENPP1	chr6	protein_coding	ectonucleotide pyrophosphatase/phosphodiesterase 1
ENSG00000279328.1	0.03	0	0.06	0.02	0	0.02	RP11-203H19.2	chr3	TEC	--
ENSG00000168421.13	0.01	0.01	0	0.03	0.01	0.06	RHOH	chr4	protein_coding	ras homolog family member H
ENSG00000091947.10	12.92	11.93	11.96	12.28	12.68	12.59	TMEM101	chr17	protein_coding	transmembrane protein 101
ENSG00000067646.12	0.01	0	0.01	0	0	0	ZFY	chrY	protein_coding	zinc finger protein Y-linked
ENSG00000146399.3	0	0.01	0	0	0.01	0	TAAR1	chr6	protein_coding	trace amine associated receptor 1
ENSG00000226086.5	0.04	0	0	0.04	0	0.04	EIF3LP3	chr10	processed_pseudogene	eukaryotic translation initiation factor 3 subunit L pseudogene 3
ENSG00000169084.15	0.1	0.11	0.2	0.12	0.17	0.08	DHRSX	chrX	protein_coding	dehydrogenase/reductase X-linked
ENSG00000225530.1	0	0	0	0	0	0.02	SP3P	chr13	processed_pseudogene	Sp3 transcription factor pseudogene
ENSG00000233521.7	2.02	1.96	2.15	1.68	1.49	1.54	LINC01638	chr22	lncRNA	long intergenic non-protein coding RNA 1638
ENSG00000110852.5	3.74	4.18	4.01	3.59	3.31	3.56	CLEC2B	chr12	protein_coding	C-type lectin domain family 2 member B
ENSG00000104267.10	0.05	0.06	0.01	0.08	0.11	0.1	CA2	chr8	protein_coding	carbonic anhydrase 2
ENSG00000101384.12	2.91	2.74	2.61	7.24	7.12	6.97	JAG1	chr20	protein_coding	jagged canonical Notch ligand 1
ENSG00000271880.1	0.12	0.13	0.07	0.09	0.03	0.03	RP11-96C23.5	chr10	lncRNA	--
ENSG00000124713.6	0.58	0.35	0.24	0.78	0.29	0.25	GNMT	chr6	protein_coding	glycine N-methyltransferase
ENSG00000139304.16	0	0	0	0.03	0.03	0.01	PTPRQ	chr12	protein_coding	protein tyrosine phosphatase receptor type Q
ENSG00000148773.14	14.26	15.34	16.03	18.86	17.89	16.79	MKI67	chr10	protein_coding	marker of proliferation Ki-67
ENSG00000188931.4	0.12	0.08	0.07	0.17	0	0.04	CFAP126	chr1	protein_coding	cilia and flagella associated protein 126
ENSG00000276027.1	0.21	0.2	0	0.86	0.84	0.44	RNU12	chr22	snRNA	RNA, U12 small nuclear
ENSG00000106105.15	10.36	10.77	11.01	12.86	13.31	13.18	GARS1	chr7	protein_coding	glycyl-tRNA synthetase 1
ENSG00000163705.13	0.05	0.03	0	0.03	0.02	0	FANCD2OS	chr3	protein_coding	FANCD2 opposite strand
ENSG00000197857.15	0.74	0.97	0.75	0.82	0.86	0.81	ZNF44	chr19	protein_coding	zinc finger protein 44
ENSG00000141965.5	3.71	3.58	3.77	4.61	4.78	4.64	FEM1A	chr19	protein_coding	fem-1 homolog A
ENSG00000281383.1	1.54	0.76	0.69	3.41	2.05	1.76	CH507-513H4.5	chr21	lncRNA	--
ENSG00000271963.1	0	0.07	0	0	0	0	CTD-2140B24.6	chr12	lncRNA	--
ENSG00000174307.7	16.33	16.46	17.31	10.73	11.03	11.39	PHLDA3	chr1	protein_coding	pleckstrin homology like domain family A member 3
ENSG00000233924.1	0	0	0	0.04	0.07	0	RPSAP13	chr14	processed_pseudogene	ribosomal protein SA pseudogene 13
ENSG00000232586.1	0.19	0.22	0.2	0.23	0.11	0.32	KIAA1614-AS1	chr1	lncRNA	KIAA1614 antisense RNA 1
ENSG00000267698.1	1.45	0.78	0.85	1.21	0.98	1.34	AC002116.7	chr19	lncRNA	--
ENSG00000272420.1	0.22	0.46	0.05	0.11	0.17	0.23	RP4-740C4.7	chr1	lncRNA	--
ENSG00000230285.1	0.85	1.27	0.45	2.42	2.97	1.43	RP11-290M5.2	chr1	lncRNA	--
ENSG00000121207.12	0	0.01	0.01	0.02	0	0.02	LRAT	chr4	protein_coding	lecithin retinol acyltransferase
ENSG00000235036.4	0.02	0	0.02	0	0	0	RP5-1099D15.1	chr20	processed_pseudogene	--
ENSG00000241741.1	0.19	0.18	0.33	0.16	0.2	0.04	RPL7AP30	chr4	processed_pseudogene	ribosomal protein L7a pseudogene 30
ENSG00000068650.19	2.26	2.08	1.87	1.39	1.33	1.31	ATP11A	chr13	protein_coding	ATPase phospholipid transporting 11A
ENSG00000005981.13	0.01	0.01	0.01	0.01	0	0	ASB4	chr7	protein_coding	ankyrin repeat and SOCS box containing 4
ENSG00000122965.11	4.01	4.35	4.24	4.28	4.14	3.76	RBM19	chr12	protein_coding	RNA binding motif protein 19
ENSG00000134256.13	0.01	0.01	0.01	0.02	0	0.01	CD101	chr1	protein_coding	CD101 molecule
ENSG00000285816.1	22.94	23.69	24.76	25.51	25.6	25.71	RP11-867O8.9	chr11	protein_coding	--
ENSG00000285791.1	0.73	0.6	0.75	0.85	0.73	0.64	RP11-346I3.5	chr8	protein_coding	--
ENSG00000128510.12	10.24	10.41	10.48	9.08	9.6	9.1	CPA4	chr7	protein_coding	carboxypeptidase A4
ENSG00000257496.1	0.06	0.16	0	0	0.11	0	RP11-474P2.4	chr12	lncRNA	--
ENSG00000105520.10	16.79	16.44	17.15	15.56	15.35	16.41	PLPPR2	chr19	protein_coding	phospholipid phosphatase related 2
ENSG00000187961.14	1.98	2.2	2.05	2.8	2.31	2.6	KLHL17	chr1	protein_coding	kelch like family member 17
ENSG00000136425.14	0.07	0.04	0.03	0.03	0.06	0.05	CIB2	chr15	protein_coding	calcium and integrin binding family member 2
ENSG00000161677.12	24.33	24.87	27.52	22.4	22.01	23.8	JOSD2	chr19	protein_coding	Josephin domain containing 2
ENSG00000166681.14	174.33	176.86	168.83	133.68	134.94	136.81	BEX3	chrX	protein_coding	brain expressed X-linked 3
ENSG00000019102.12	0.15	0.06	0.06	0.22	0.24	0.14	VSIG2	chr11	protein_coding	V-set and immunoglobulin domain containing 2
ENSG00000005379.17	0.7	0.68	0.7	0.21	0.18	0.24	TSPOAP1	chr17	protein_coding	TSPO associated protein 1
ENSG00000203875.13	0.3	0.29	0.22	0.34	0.31	0.28	SNHG5	chr6	lncRNA	small nucleolar RNA host gene 5
ENSG00000253842.2	0	0	0	0.01	0.01	0	KB-173C10.1	chr8	lncRNA	--
ENSG00000254093.9	3.82	4.15	3.99	5	5.39	5.84	PINX1	chr8	protein_coding	PIN2 (TERF1) interacting telomerase inhibitor 1
ENSG00000272081.1	0.38	0.36	0.35	0.07	0.13	0.13	FCHO2-DT	chr5	lncRNA	FCHO2 divergent transcript
ENSG00000137055.15	7.57	7.84	7.8	8.34	8.73	8.45	PLAA	chr9	protein_coding	phospholipase A2 activating protein
ENSG00000131044.17	0.02	0.01	0	0.01	0	0.01	TTLL9	chr20	protein_coding	tubulin tyrosine ligase like 9
ENSG00000285584.2	0	0	0	0.05	0	0.02	RP11-359N5.2	chr14	lncRNA	--
ENSG00000262528.2	0	0.02	0	0.02	0.09	0	LA16c-349E10.1	chr16	lncRNA	--
ENSG00000165626.18	2.66	2.36	2.27	3.01	2.99	2.97	BEND7	chr10	protein_coding	BEN domain containing 7
ENSG00000258804.1	0	0	0	0	0	0.02	LINC01148	chr14	lncRNA	long intergenic non-protein coding RNA 1148
ENSG00000134283.18	2.61	2.87	2.81	2.9	3.21	2.9	PPHLN1	chr12	protein_coding	periphilin 1
ENSG00000144485.11	6.44	5.93	5.41	3.6	3.6	4.29	HES6	chr2	protein_coding	hes family bHLH transcription factor 6
ENSG00000250447.6	0.02	0	0	0	0	0	LINC02105	chr5	lncRNA	long intergenic non-protein coding RNA 2105
ENSG00000267030.1	0.11	0.16	0.43	0.36	0.23	0.25	CTB-50L17.7	chr19	lncRNA	--
ENSG00000243753.5	0.24	0.23	0.15	0.25	0.22	0.18	HLA-L	chr6	transcribed_unprocessed_pseudogene	major histocompatibility complex, class I, L (pseudogene)
ENSG00000136960.13	0.04	0.01	0	0.02	0.01	0.01	ENPP2	chr8	protein_coding	ectonucleotide pyrophosphatase/phosphodiesterase 2
ENSG00000048392.12	3.42	3.54	3.91	3.04	3.28	3.24	RRM2B	chr8	protein_coding	ribonucleotide reductase regulatory TP53 inducible subunit M2B
ENSG00000112877.8	2.13	2.54	2.08	3.45	3.14	2.87	CEP72	chr5	protein_coding	centrosomal protein 72
ENSG00000225790.2	0	0	0	0	0.02	0.02	RP11-2L8.1	chr3	lncRNA	--
ENSG00000172340.15	18.03	18.77	17.64	19.79	20.32	19.79	SUCLG2	chr3	protein_coding	succinate-CoA ligase GDP-forming subunit beta
ENSG00000157514.17	3.49	3.63	3.57	1.71	1.96	2.27	TSC22D3	chrX	protein_coding	TSC22 domain family member 3
ENSG00000286863.1	0	0	0	0	0	0.01	RP4-660H19.2	chr1	lncRNA	--
ENSG00000106682.16	71.56	74.67	75.77	82.25	82.9	83.36	EIF4H	chr7	protein_coding	eukaryotic translation initiation factor 4H
ENSG00000145349.18	4.66	4.72	4.57	3.15	2.74	3.15	CAMK2D	chr4	protein_coding	calcium/calmodulin dependent protein kinase II delta
ENSG00000197253.13	0.02	0.08	0	0.06	0.02	0.06	TPSB2	chr16	protein_coding	tryptase beta 2
ENSG00000264204.2	0.02	0.06	0.04	0	0	0	AGAP7P	chr10	unprocessed_pseudogene	ArfGAP with GTPase domain, ankyrin repeat and PH domain 7, pseudogene
ENSG00000275132.1	0	0	0	0	0.11	0	RN7SL663P	chr19	misc_RNA	RNA, 7SL, cytoplasmic 663, pseudogene
ENSG00000273419.1	0.16	0.18	0.19	0.22	0.15	0.18	RP4-751H13.7	chr7	lncRNA	--
ENSG00000164764.11	0.03	0.01	0	0	0	0.01	SBSPON	chr8	protein_coding	somatomedin B and thrombospondin type 1 domain containing
ENSG00000280269.1	0.14	0.23	0.07	0.11	0	0.04	AP000577.2	chr11	TEC	--
ENSG00000018236.15	0.01	0	0.01	0	0.01	0.01	CNTN1	chr12	protein_coding	contactin 1
ENSG00000238290.1	0.03	0.06	0.1	0.08	0.17	0.05	RP11-431K24.1	chr1	lncRNA	--
ENSG00000256039.2	0	0	0	0.02	0	0	LINC02446	chr12	lncRNA	long intergenic non-protein coding RNA 2446
ENSG00000286619.1	0.03	0.02	0.01	0.04	0.04	0.06	RP4-681L3.3	chr1	lncRNA	--
ENSG00000120709.11	7.23	7.26	7.15	6.4	7.03	6.15	FAM53C	chr5	protein_coding	family with sequence similarity 53 member C
ENSG00000224424.8	0.23	0.17	0.24	0.26	0.34	0.33	PRKAR2A-AS1	chr3	lncRNA	PRKAR2A antisense RNA 1
ENSG00000164199.18	0	0	0	0.02	0.02	0.01	ADGRV1	chr5	protein_coding	adhesion G protein-coupled receptor V1
ENSG00000238251.2	0.06	0	0	0	0	0.06	NSA2P7	chr9	processed_pseudogene	NSA2 pseudogene 7
ENSG00000228541.1	0	0	0.2	0	0	0	AC093159.1	chr2	lncRNA	--
ENSG00000185046.19	0.01	0.03	0.01	0.03	0.03	0.03	ANKS1B	chr12	protein_coding	ankyrin repeat and sterile alpha motif domain containing 1B
ENSG00000168026.19	0.14	0.19	0.2	0.15	0.11	0.12	TTC21A	chr3	protein_coding	tetratricopeptide repeat domain 21A
ENSG00000197882.3	0.03	0	0.09	0	0	0	OR7E13P	chr11	unprocessed_pseudogene	olfactory receptor family 7 subfamily E member 13 pseudogene
ENSG00000133687.16	0	0	0	0.01	0.02	0.01	TMTC1	chr12	protein_coding	transmembrane O-mannosyltransferase targeting cadherins 1
ENSG00000223609.11	0.08	0	0	0	0	0	HBD	chr11	protein_coding	hemoglobin subunit delta
ENSG00000242028.8	0.02	0.02	0.01	0	0.02	0.03	HYPK	chr15	protein_coding	huntingtin interacting protein K
ENSG00000213047.13	0.55	0.59	0.52	0.44	0.42	0.33	DENND1B	chr1	protein_coding	DENN domain containing 1B
ENSG00000200651.1	0	0.28	0.27	0.62	0	0	Y_RNA	chr17	misc_RNA	--
ENSG00000135250.17	4.47	3.87	4.47	4.48	4.39	4.27	SRPK2	chr7	protein_coding	SRSF protein kinase 2
ENSG00000153827.14	6.66	7.2	7	7.38	7.22	7.38	TRIP12	chr2	protein_coding	thyroid hormone receptor interactor 12
ENSG00000230691.1	0.05	0.05	0.1	0	0.06	0.12	MRPL35P4	chrX	processed_pseudogene	mitochondrial ribosomal protein L35 pseudogene 4
ENSG00000258897.1	0	0	0	0	0	0.11	EGLN3-AS1	chr14	lncRNA	EGLN3 antisense RNA 1
ENSG00000089902.10	6.03	5.91	5.46	6.53	6.92	6.38	RCOR1	chr14	protein_coding	REST corepressor 1
ENSG00000126215.14	5.15	4.87	4.87	6.23	6.38	6.49	XRCC3	chr14	protein_coding	X-ray repair cross complementing 3
ENSG00000231062.1	0	0	0	0	0	0.06	AC103563.9	chr2	lncRNA	--
ENSG00000256966.6	21.26	22.04	22.3	23.58	23.94	23.38	RP11-613M10.8	chr9	protein_coding	--
ENSG00000286527.1	0	0.02	0.09	0.02	0.02	0.03	RP11-431H16.4	chr14	lncRNA	--
ENSG00000166226.13	41.8	43.77	42.02	48.15	50.08	47.84	CCT2	chr12	protein_coding	chaperonin containing TCP1 subunit 2
ENSG00000275441.1	1.22	0.81	2.13	1.58	1.24	1.46	RP11-666O2.2	chr16	lncRNA	--
ENSG00000260107.1	1.91	2.04	2.29	3.28	2.13	3.02	AC005606.15	chr16	lncRNA	--
ENSG00000204010.3	0	0	0.06	0.03	0.02	0.02	IFIT1B	chr10	protein_coding	interferon induced protein with tetratricopeptide repeats 1B
ENSG00000253520.1	0	0	0	0	0.11	0	RP11-798K23.5	chr5	processed_pseudogene	--
ENSG00000280384.1	0.02	0	0.04	0	0	0.02	RP4-695O20.1	chr22	lncRNA	--
ENSG00000225971.1	0.04	0	0	0	0	0	RPS3AP51	chr22	processed_pseudogene	RPS3A pseudogene 51
ENSG00000112242.15	5.33	5.62	5.72	6.92	6.69	6.71	E2F3	chr6	protein_coding	E2F transcription factor 3
ENSG00000100292.18	12.26	12.44	13.14	9.01	9	9.61	HMOX1	chr22	protein_coding	heme oxygenase 1
ENSG00000120784.17	1.37	1.18	1.12	1.15	0.99	1.01	ZFP30	chr19	protein_coding	ZFP30 zinc finger protein
ENSG00000115365.12	3.63	3.67	3.88	3.24	2.93	3.11	LANCL1	chr2	protein_coding	LanC like 1
ENSG00000219481.10	0.62	0.81	0.68	1.01	1.06	0.95	NBPF1	chr1	protein_coding	NBPF member 1
ENSG00000100288.20	0.02	0.03	0.01	0.03	0.02	0.02	CHKB	chr22	protein_coding	choline kinase beta
ENSG00000204802.3	0.18	0.18	0.23	0.16	0.35	0.35	RP11-111F5.4	chr9	lncRNA	--
ENSG00000211788.2	0	0	0	0	0	0.09	TRAV13-1	chr14	TR_V_gene	T cell receptor alpha variable 13-1
ENSG00000175147.13	0.01	0.02	0.01	0.06	0.03	0.03	TMEM51-AS1	chr1	lncRNA	TMEM51 antisense RNA 1
ENSG00000163625.16	1.9	1.93	1.86	1.9	1.78	1.84	WDFY3	chr4	protein_coding	WD repeat and FYVE domain containing 3
ENSG00000145241.11	0.92	1.06	1.04	0.85	0.98	0.91	CENPC	chr4	protein_coding	centromere protein C
ENSG00000171469.11	2.28	2.46	2.12	2.34	2.53	2.42	ZNF561	chr19	protein_coding	zinc finger protein 561
ENSG00000139985.8	0	0	0.02	0.01	0.01	0.04	ADAM21	chr14	protein_coding	ADAM metallopeptidase domain 21
ENSG00000147853.17	7.01	6.71	6.9	6.85	6.98	6.8	AK3	chr9	protein_coding	adenylate kinase 3
ENSG00000263015.1	0	0.18	0.41	0.13	0	0.27	RP5-1029F21.3	chr17	lncRNA	--
ENSG00000179950.14	36.46	35.55	36.05	37.02	37.7	38.83	PUF60	chr8	protein_coding	poly(U) binding splicing factor 60
ENSG00000157152.17	0.02	0	0.02	0.01	0.03	0.01	SYN2	chr3	protein_coding	synapsin II
ENSG00000068976.14	0.05	0.05	0.04	0.03	0.01	0.02	PYGM	chr11	protein_coding	glycogen phosphorylase, muscle associated
ENSG00000281195.1	0.02	0	0.02	0.02	0	0	RP11-236P2.2	chr2	lncRNA	--
ENSG00000275552.1	0.02	0.02	0.01	0	0.01	0.02	CH17-302M23.1	chr14	lncRNA	--
ENSG00000096746.18	21.52	22.98	22.14	25.63	24.47	25.57	HNRNPH3	chr10	protein_coding	heterogeneous nuclear ribonucleoprotein H3
ENSG00000167601.12	146.59	145.34	145.58	153.53	157.42	154.37	AXL	chr19	protein_coding	AXL receptor tyrosine kinase
ENSG00000135940.7	115.55	120.9	116.96	92.26	95.9	93.3	COX5B	chr2	protein_coding	cytochrome c oxidase subunit 5B
ENSG00000143947.15	199.04	208.54	190.81	222.85	243.69	226.27	RPS27A	chr2	protein_coding	ribosomal protein S27a
ENSG00000261456.6	0.02	0.05	0.01	0.01	0.02	0.02	TUBB8	chr10	protein_coding	tubulin beta 8 class VIII
ENSG00000135469.14	3.65	3.87	3.33	4.41	4.25	4.48	COQ10A	chr12	protein_coding	coenzyme Q10A
ENSG00000111325.16	4.35	3.96	4.45	3.79	3.73	3.67	OGFOD2	chr12	protein_coding	2-oxoglutarate and iron dependent oxygenase domain containing 2
ENSG00000132205.11	2	1.71	1.83	2.43	2.5	2.4	EMILIN2	chr18	protein_coding	elastin microfibril interfacer 2
ENSG00000102003.11	0.51	0.46	0.34	0.46	0.45	0.52	SYP	chrX	protein_coding	synaptophysin
ENSG00000198692.10	0.01	0.01	0.01	0	0.01	0.02	EIF1AY	chrY	protein_coding	eukaryotic translation initiation factor 1A Y-linked
ENSG00000166920.13	70.85	73.53	73.47	138.59	151.72	146.39	C15orf48	chr15	protein_coding	chromosome 15 open reading frame 48
ENSG00000227212.3	0.23	0	0	0	0	0	PFN1P6	chr1	processed_pseudogene	profilin 1 pseudogene 6
ENSG00000235109.8	0.43	0.28	0.32	0.31	0.38	0.39	ZSCAN31	chr6	protein_coding	zinc finger and SCAN domain containing 31
ENSG00000278627.1	0.1	0	0.09	0.05	0	0	RP11-506H21.5	chr17	lncRNA	--
ENSG00000122484.9	0.95	1.09	0.91	1.03	1.2	1.02	RPAP2	chr1	protein_coding	RNA polymerase II associated protein 2
ENSG00000276148.1	0.6	0.5	0.21	0.47	0.31	0.48	RP11-278C7.4	chr12	lncRNA	--
ENSG00000196547.15	2.82	3.07	2.71	2.98	2.72	3.07	MAN2A2	chr15	protein_coding	mannosidase alpha class 2A member 2
ENSG00000168079.17	0.05	0.03	0.05	0.02	0	0.01	SCARA5	chr8	protein_coding	scavenger receptor class A member 5
ENSG00000128294.16	7.65	7.11	7.64	7.53	8.2	7.82	TPST2	chr22	protein_coding	tyrosylprotein sulfotransferase 2
ENSG00000175746.6	0	0.02	0	0	0	0.03	C15orf54	chr15	lncRNA	--
ENSG00000226564.1	0.4	0.05	0.05	0.24	0.17	0.42	FTH1P20	chr2	processed_pseudogene	ferritin heavy chain 1 pseudogene 20
ENSG00000266258.1	1.1	1.33	1.33	0.87	0.76	0.99	LINC01909	chr18	lncRNA	long intergenic non-protein coding RNA 1909
ENSG00000188643.11	281.59	278.21	291.75	251.27	259.82	262.19	S100A16	chr1	protein_coding	S100 calcium binding protein A16
ENSG00000187498.16	1.48	1.51	1.51	1.36	1.69	1.64	COL4A1	chr13	protein_coding	collagen type IV alpha 1 chain
ENSG00000204253.4	1.2	0.83	0.85	0.37	0.97	0.83	HNRNPCP2	chr2	processed_pseudogene	heterogeneous nuclear ribonucleoprotein C pseudogene 2
ENSG00000279805.1	0.02	0.09	0.07	0.1	0.08	0.02	CTA-212A2.1	chr22	TEC	--
ENSG00000285525.1	0	0	0	0.05	0.07	0	RP11-84O12.5	chr1	lncRNA	--
ENSG00000270726.6	0.04	0.08	0.07	0.13	0.04	0.04	AJ271736.10	chrX	lncRNA	--
ENSG00000175564.13	0.09	0.12	0.16	0.11	0.07	0.2	UCP3	chr11	protein_coding	uncoupling protein 3
ENSG00000143222.12	37.74	39.61	40.58	39.42	42.51	39.87	UFC1	chr1	protein_coding	ubiquitin-fold modifier conjugating enzyme 1
ENSG00000109758.9	0.03	0.09	0.11	0.01	0.05	0	HGFAC	chr4	protein_coding	HGF activator
ENSG00000285953.1	2.11	2.15	2.06	2.42	2.11	2.02	CTB-161K23.3	chr7	protein_coding	--
ENSG00000189343.7	0.53	0.66	0.82	0.44	0.89	0.71	RPS2P46	chr17	processed_pseudogene	ribosomal protein S2 pseudogene 46
ENSG00000234715.2	0.02	0.01	0	0	0.01	0	CTB-107G13.1	chr7	lncRNA	--
ENSG00000139289.14	71.57	69.69	69.76	74.53	74.57	76.34	PHLDA1	chr12	protein_coding	pleckstrin homology like domain family A member 1
ENSG00000169019.11	18.92	19.77	15.85	11.78	13.11	12.04	COMMD8	chr4	protein_coding	COMM domain containing 8
ENSG00000196792.12	4.01	3.77	3.16	3.87	3.94	3.03	STRN3	chr14	protein_coding	striatin 3
ENSG00000234072.1	1.42	1.78	1.8	2.22	2.3	2.36	AC074117.10	chr2	lncRNA	--
ENSG00000135506.16	21.19	20.67	20.7	19.01	19.51	18.99	OS9	chr12	protein_coding	OS9 endoplasmic reticulum lectin
ENSG00000265840.1	1.19	1.64	1.1	2.26	1.65	1.39	AC010761.10	chr17	lncRNA	--
ENSG00000260077.1	1.74	1.49	1.52	2	2.09	1.85	RP11-254F7.2	chr2	lncRNA	--
ENSG00000156427.8	0.08	0.18	0.13	0.13	0.11	0.1	FGF18	chr5	protein_coding	fibroblast growth factor 18
ENSG00000053372.5	37.17	37.48	35.8	44.51	47.35	43.29	MRTO4	chr1	protein_coding	MRT4 homolog, ribosome maturation factor
ENSG00000130520.11	87.09	86.02	84.09	85.09	89.09	87.38	LSM4	chr19	protein_coding	LSM4 homolog, U6 small nuclear RNA and mRNA degradation associated
ENSG00000259347.7	0.04	0.01	0.02	0.01	0.03	0.02	RP11-798K3.2	chr15	lncRNA	--
ENSG00000279108.1	0.97	0.76	0.75	0.48	0.5	0.39	CTC-490E21.11	chr19	TEC	--
ENSG00000196943.14	2.42	2.46	2.4	3.56	3.38	3.4	NOP9	chr14	protein_coding	NOP9 nucleolar protein
ENSG00000185442.13	0.42	0.28	0.46	1.02	1.05	1.02	FAM174B	chr15	protein_coding	family with sequence similarity 174 member B
ENSG00000287799.1	0.05	0.05	0	0.05	0.05	0	GS1-166A23.3	chr7	lncRNA	--
ENSG00000241549.8	0.03	0.01	0.03	0	0.02	0	GUSBP2	chr6	transcribed_unprocessed_pseudogene	GUSB pseudogene 2
ENSG00000269947.1	0.37	0.44	0.38	0.67	0.61	0.59	RP11-849F2.9	chr17	lncRNA	--
ENSG00000279049.1	0	0.12	0.11	0.25	0.12	0.13	ENSG00000279049	chr1	pseudogene	--
ENSG00000274565.1	0.03	0.03	0.05	0.06	0.05	0.03	CTD-3035K23.7	chr17	lncRNA	--
ENSG00000283148.1	0.07	0.17	0.1	0.04	0.22	0	RP11-456N14.4	chr3	lncRNA	--
ENSG00000254595.1	0.27	0.38	0.21	0.28	0.37	0.34	CTD-2010I16.1	chr11	processed_pseudogene	--
ENSG00000134982.17	1.15	1.11	1.28	1.31	1.08	1.04	APC	chr5	protein_coding	APC regulator of WNT signaling pathway
ENSG00000103197.18	2.07	2.16	2.41	2.29	2.18	2.41	TSC2	chr16	protein_coding	TSC complex subunit 2
ENSG00000023171.19	0.87	0.78	0.87	0.1	0.09	0.07	GRAMD1B	chr11	protein_coding	GRAM domain containing 1B
ENSG00000223802.9	0.14	0.14	0.17	0.09	0.04	0.11	CERS1	chr19	protein_coding	ceramide synthase 1
ENSG00000115361.8	0	0.02	0.03	0.01	0.01	0.01	ACADL	chr2	protein_coding	acyl-CoA dehydrogenase long chain
ENSG00000257818.1	0	0.08	0.08	0.03	0	0	C1GALT1P1	chr12	processed_pseudogene	C1GALT1 pseudogene 1
ENSG00000183396.4	0.05	0.05	0.05	0.06	0	0	TMEM89	chr3	protein_coding	transmembrane protein 89
ENSG00000138029.14	16.47	16.6	15.47	18.12	18.96	18.03	HADHB	chr2	protein_coding	hydroxyacyl-CoA dehydrogenase trifunctional multienzyme complex subunit beta
ENSG00000162924.15	0.24	0.25	0.2	0.33	0.31	0.24	REL	chr2	protein_coding	REL proto-oncogene, NF-kB subunit
ENSG00000181856.15	0.09	0.01	0.01	0.05	0.05	0.05	SLC2A4	chr17	protein_coding	solute carrier family 2 member 4
ENSG00000273733.1	0.69	0.36	0.53	0.33	0.39	0.2	CTC-510F12.7	chr19	lncRNA	--
ENSG00000285803.1	0	0	0	0.03	0	0	RP11-324H6.8	chr10	lncRNA	--
ENSG00000110422.12	2.6	2.89	2.54	2.03	1.9	1.98	HIPK3	chr11	protein_coding	homeodomain interacting protein kinase 3
ENSG00000144119.4	0	0.02	0	0	0	0	C1QL2	chr2	protein_coding	complement C1q like 2
ENSG00000130813.18	3.16	3.4	3.4	3.74	3.64	3.85	SHFL	chr19	protein_coding	shiftless antiviral inhibitor of ribosomal frameshifting
ENSG00000261602.1	1.19	1.12	1.15	0.62	0.49	0.4	CTD-2033A16.1	chr16	lncRNA	--
ENSG00000211679.2	0.47	0.32	0.19	0.56	0.27	0.14	IGLC3	chr22	IG_C_gene	immunoglobulin lambda constant 3 (Kern-Oz+ marker)
ENSG00000235559.1	0.17	0.32	0.08	0.35	0.17	0.36	NOP56P1	chr6	processed_pseudogene	NOP56 ribonucleoprotein pseudogene 1
ENSG00000147100.11	1.71	1.71	1.85	1.87	1.93	1.77	SLC16A2	chrX	protein_coding	solute carrier family 16 member 2
ENSG00000279172.1	0.49	0.4	0.26	0.22	0.14	0.45	CTB-52I2.7	chr19	TEC	--
ENSG00000138777.20	16.46	15.69	15.57	13.03	13.72	12.92	PPA2	chr4	protein_coding	inorganic pyrophosphatase 2
ENSG00000124164.16	6.23	6.19	6.25	6.1	6.8	6.24	VAPB	chr20	protein_coding	VAMP associated protein B and C
ENSG00000232814.2	0.34	0.27	0.37	0.66	0.47	0.18	COL4A2-AS1	chr13	lncRNA	COL4A2 antisense RNA 1
ENSG00000236297.1	0	0.06	0	0	0.07	0	RP11-175P19.2	chr3	transcribed_processed_pseudogene	--
ENSG00000071553.18	30.79	29.02	31.15	33.79	34.33	35.36	ATP6AP1	chrX	protein_coding	ATPase H+ transporting accessory protein 1
ENSG00000243479.3	0.8	0.79	0.89	1.56	0.64	1.3	MNX1-AS1	chr7	lncRNA	MNX1 antisense RNA 1 (head to head)
ENSG00000105373.19	16.84	16.61	17.05	15.76	16.03	16.66	NOP53	chr19	protein_coding	NOP53 ribosome biogenesis factor
ENSG00000214534.5	0.02	0.01	0	0.01	0	0	ZNF705E	chr11	protein_coding	zinc finger protein 705E
ENSG00000181396.13	5.3	5.56	5.41	5.72	5.94	5.87	OGFOD3	chr17	protein_coding	2-oxoglutarate and iron dependent oxygenase domain containing 3
ENSG00000250732.1	0	0	0	0.05	0.05	0.15	RPEP1	chr5	processed_pseudogene	ribulose-5-phosphate-3-epimerase pseudogene 1
ENSG00000084623.12	26.58	26.36	26.54	28.72	29.86	29.12	EIF3I	chr1	protein_coding	eukaryotic translation initiation factor 3 subunit I
ENSG00000189212.12	0	0	0	0	0.01	0	DPY19L2P1	chr7	transcribed_unprocessed_pseudogene	DPY19L2 pseudogene 1
ENSG00000130957.5	0.02	0.04	0	0	0	0	FBP2	chr9	protein_coding	fructose-bisphosphatase 2
ENSG00000285713.1	2.43	2.9	2.81	3.6	4.2	3.44	RP11-1289C17.2	chr4	protein_coding	--
ENSG00000237298.10	0.05	0.06	0.06	0.08	0.08	0.05	TTN-AS1	chr2	lncRNA	TTN antisense RNA 1
ENSG00000241293.1	0.02	0	0	0	0	0	PPATP1	chr3	processed_pseudogene	phosphoribosyl pyrophosphate amidotransferase pseudogene 1
ENSG00000105197.11	17.34	17	16.98	18.32	19.07	18.48	TIMM50	chr19	protein_coding	translocase of inner mitochondrial membrane 50
ENSG00000265190.7	1.53	1.43	1.31	2.52	2.86	2.87	ANXA8	chr10	protein_coding	annexin A8
ENSG00000228118.3	0.07	0	0	0	0	0	MYL6P5	chr17	processed_pseudogene	MYL6 pseudogene 5
ENSG00000232216.1	0	0	0	0	0.07	0	IGHV3-43	chr14	IG_V_gene	immunoglobulin heavy variable 3-43
ENSG00000287299.1	0.77	0.68	0.84	0.88	0.64	0.77	RP11-6G22.1	chr2	lncRNA	--
ENSG00000268912.1	0.18	0.29	0.17	0.13	0.11	0.28	CTD-2619J13.17	chr19	lncRNA	--
ENSG00000167861.16	0.34	0.3	0.43	1.19	0.99	1.12	HID1	chr17	protein_coding	HID1 domain containing
ENSG00000213700.3	0.62	0.86	1.27	0.59	0.52	0.79	RPL17P50	chr10	processed_pseudogene	ribosomal protein L17 pseudogene 50
ENSG00000279123.1	0.04	0.04	0	0.05	0	0	RP11-424M24.3	chr16	TEC	--
ENSG00000162419.13	2.09	1.87	1.83	2.02	2.2	1.96	GMEB1	chr1	protein_coding	glucocorticoid modulatory element binding protein 1
ENSG00000244486.9	0.49	0.37	0.55	0.33	0.35	0.52	SCARF2	chr22	protein_coding	scavenger receptor class F member 2
ENSG00000224597.10	5.31	5.04	5.15	4.73	4.5	4.37	SVIL-AS1	chr10	transcribed_unprocessed_pseudogene	SVIL antisense RNA 1
ENSG00000180479.14	0.33	0.32	0.3	0.36	0.38	0.36	ZNF571	chr19	protein_coding	zinc finger protein 571
ENSG00000273890.1	0.13	0	0	0.13	0	0	RP11-603J24.21	chr12	lncRNA	--
ENSG00000123600.21	1.89	2.24	2.01	1.86	1.87	1.84	METTL8	chr2	protein_coding	methyltransferase 8, methylcytidine
ENSG00000179611.3	0.09	0.1	0.06	0.09	0.07	0.05	DGKZP1	chr13	processed_pseudogene	diacylglycerol kinase zeta pseudogene 1
ENSG00000260836.2	0	0.01	0	0	0.01	0	RP11-152F13.10	chr15	protein_coding	--
ENSG00000136286.16	0.05	0.05	0.04	0.07	0.04	0.02	MYO1G	chr7	protein_coding	myosin IG
ENSG00000273119.1	0.04	0.08	0	0	0	0	RP11-128P17.4	chr18	lncRNA	--
ENSG00000286633.1	0	0.04	0.08	0.04	0.04	0.04	RP11-367G6.4	chr6	lncRNA	--
ENSG00000237813.4	1.22	1.51	1.12	1.14	0.84	0.65	AC002066.1	chr7	lncRNA	--
ENSG00000233776.5	0.06	0	0	0	0.06	0	LINC01251	chr9	lncRNA	long intergenic non-protein coding RNA 1251
ENSG00000173918.15	1.81	1.71	1.88	2.91	2.88	2.76	C1QTNF1	chr17	protein_coding	C1q and TNF related 1
ENSG00000185697.17	4.37	4.62	4.38	3.5	3.33	3.41	MYBL1	chr8	protein_coding	MYB proto-oncogene like 1
ENSG00000108244.17	0	0.01	0	0.02	0.03	0.01	KRT23	chr17	protein_coding	keratin 23
ENSG00000206992.1	0.29	0	0	0.61	0.59	0.93	RNU6-574P	chr12	snRNA	RNA, U6 small nuclear 574, pseudogene
ENSG00000179750.16	6.67	6.54	7.75	5.73	6.17	6.29	APOBEC3B	chr22	protein_coding	apolipoprotein B mRNA editing enzyme catalytic subunit 3B
ENSG00000175857.9	0.03	0	0.01	0.01	0.01	0.03	GAPT	chr5	protein_coding	GRB2 binding adaptor protein, transmembrane
ENSG00000125863.20	8.83	9.47	9.03	9.2	9.59	9.09	MKKS	chr20	protein_coding	MKKS centrosomal shuttling protein
ENSG00000111678.11	22.09	20.98	21.65	22.66	24.57	25.24	C12orf57	chr12	protein_coding	chromosome 12 open reading frame 57
ENSG00000262136.1	5.13	4.16	4.72	4.22	5.33	4.81	NQO1-DT	chr16	lncRNA	NQO1 divergent transcript
ENSG00000187244.12	2.91	2.66	3.6	2.37	2.04	2.56	BCAM	chr19	protein_coding	basal cell adhesion molecule (Lutheran blood group)
ENSG00000153898.13	0.73	1.04	0.73	1.03	1.03	1.06	MCOLN2	chr1	protein_coding	mucolipin TRP cation channel 2
ENSG00000223392.1	0	0	0	0	0	0.04	CLDN10-AS1	chr13	lncRNA	CLDN10 antisense RNA 1
ENSG00000164399.5	0	0	0	0	0	0.04	IL3	chr5	protein_coding	interleukin 3
ENSG00000226580.1	2.12	2.41	2.17	0.89	1.3	1.36	RPL39P40	chr21	processed_pseudogene	ribosomal protein L39 pseudogene 40
ENSG00000121621.7	3.48	4.08	4.06	5.05	4.4	4.62	KIF18A	chr11	protein_coding	kinesin family member 18A
ENSG00000272654.1	0.22	0.25	0.14	0.14	0.18	0.23	RP11-422P24.11	chr1	lncRNA	--
ENSG00000279943.1	0.04	0.1	0.13	0.12	0.1	0.13	FLJ38576	chr4	TEC	--
ENSG00000104205.16	0.57	0.57	0.72	0.56	0.64	0.62	SGK3	chr8	protein_coding	serum/glucocorticoid regulated kinase family member 3
ENSG00000133789.15	10.25	10.36	10.29	9.34	10.04	9.51	SWAP70	chr11	protein_coding	switching B cell complex subunit SWAP70
ENSG00000272368.2	0.11	0.11	0.13	0.12	0.03	0.12	RP4-605O3.4	chr12	lncRNA	--
ENSG00000275215.1	0.61	0.58	0.38	2.75	3.5	20.36	RNA5-8SN3	chr21	rRNA	RNA, 5.8S ribosomal N3
ENSG00000156162.16	3.22	3.3	2.91	2.46	2.55	2.5	DPY19L4	chr8	protein_coding	dpy-19 like 4
ENSG00000161270.20	0	0.01	0.01	0.05	0.04	0.02	NPHS1	chr19	protein_coding	NPHS1 adhesion molecule, nephrin
ENSG00000169951.10	1.59	1.64	1.76	1.8	2.04	2.08	ZNF764	chr16	protein_coding	zinc finger protein 764
ENSG00000149654.11	0	0	0	0	0.02	0.01	CDH22	chr20	protein_coding	cadherin 22
ENSG00000111046.4	0	0	0	0	0	0.02	MYF6	chr12	protein_coding	myogenic factor 6
ENSG00000118217.7	4.42	4.72	4.82	4.93	4.8	4.75	ATF6	chr1	protein_coding	activating transcription factor 6
ENSG00000232629.9	0.52	0.45	0.26	0.75	0.81	0.85	HLA-DQB2	chr6	protein_coding	major histocompatibility complex, class II, DQ beta 2
ENSG00000133739.16	0.45	0.59	0.55	0.47	0.59	0.49	LRRCC1	chr8	protein_coding	leucine rich repeat and coiled-coil centrosomal protein 1
ENSG00000248503.2	0.03	0.05	0.05	0.07	0.13	0.03	RP5-1000K24.2	chrX	transcribed_processed_pseudogene	--
ENSG00000228817.4	0.24	0.39	0.18	0.3	0.1	0.18	BACH1-IT2	chr21	lncRNA	BACH1 intronic transcript 2
ENSG00000109424.4	0	0	0	0	0	0.02	UCP1	chr4	protein_coding	uncoupling protein 1
ENSG00000170027.7	48.63	48.81	47.73	41.78	43.12	41.47	YWHAG	chr7	protein_coding	tyrosine 3-monooxygenase/tryptophan 5-monooxygenase activation protein gamma
ENSG00000230666.5	0	0	0	0.01	0.01	0	CEACAM22P	chr19	transcribed_unprocessed_pseudogene	CEA cell adhesion molecule 22, pseudogene
ENSG00000269706.1	0	0	0	0.05	0.15	0	CTB-60B18.15	chr19	unprocessed_pseudogene	--
ENSG00000116717.13	15.63	15.54	15.4	19.89	21.36	19.76	GADD45A	chr1	protein_coding	growth arrest and DNA damage inducible alpha
ENSG00000260448.6	0.03	0.1	0.01	0.08	0.01	0.05	LCMT1-AS1	chr16	lncRNA	LCMT1 antisense RNA 1
ENSG00000269972.1	1.29	0.67	0.65	1.6	0.36	0.25	RP3-430N8.10	chr22	lncRNA	--
ENSG00000092208.19	4.21	4.36	4.01	4.33	4.58	3.9	GEMIN2	chr14	protein_coding	gem nuclear organelle associated protein 2
ENSG00000239718.1	0	0	0	0	0.08	0	HLTF-AS1	chr3	lncRNA	HLTF antisense RNA 1
ENSG00000182154.8	167.12	166.46	170.5	153.42	161.91	162.92	MRPL41	chr9	protein_coding	mitochondrial ribosomal protein L41
ENSG00000156042.18	0.03	0.05	0.06	0.05	0.07	0.08	CFAP70	chr10	protein_coding	cilia and flagella associated protein 70
ENSG00000149527.18	0.02	0	0	0.01	0.02	0.03	PLCH2	chr1	protein_coding	phospholipase C eta 2
ENSG00000145147.20	0.46	0.5	0.43	0.84	0.76	0.74	SLIT2	chr4	protein_coding	slit guidance ligand 2
ENSG00000169710.9	21.44	21.67	23.92	18.4	16.91	18.67	FASN	chr17	protein_coding	fatty acid synthase
ENSG00000143486.16	8.13	8.06	8.25	7.79	7.8	7.58	EIF2D	chr1	protein_coding	eukaryotic translation initiation factor 2D
ENSG00000212719.13	1.2	1.25	1.13	1.44	1.33	1.34	LINC02693	chr17	lncRNA	long intergenic non-protein coding RNA 2693
ENSG00000232894.1	0.06	0.06	0	0.13	0.12	0	MRPS31P2	chr13	unprocessed_pseudogene	mitochondrial ribosomal protein S31 pseudogene 2
ENSG00000266964.6	0.02	0	0.02	0	0.02	0	FXYD1	chr19	protein_coding	FXYD domain containing ion transport regulator 1
ENSG00000286570.1	0	0.04	0	0	0.05	0	RP11-509I21.3	chr3	lncRNA	--
ENSG00000090975.14	1.68	1.67	1.94	1.16	1.18	1.13	PITPNM2	chr12	protein_coding	phosphatidylinositol transfer protein membrane associated 2
ENSG00000271151.1	0.12	0	0.05	0.06	0.09	0.09	RP11-394I13.2	chr2	lncRNA	--
ENSG00000231795.1	0	0.14	0	0	0	0	ITCH-IT1	chr20	lncRNA	ITCH intronic transcript 1
ENSG00000115128.7	73.15	75.48	74.12	86.75	89.11	86.46	SF3B6	chr2	protein_coding	splicing factor 3b subunit 6
ENSG00000138834.14	2.09	2.52	2.19	2.36	2.01	2.32	MAPK8IP3	chr16	protein_coding	mitogen-activated protein kinase 8 interacting protein 3
ENSG00000161091.14	27.16	25.44	28.01	28.29	28.34	28.1	MFSD12	chr19	protein_coding	major facilitator superfamily domain containing 12
ENSG00000225329.3	0	0	0	0	0.01	0	LHFPL3-AS2	chr7	lncRNA	LHFPL3 antisense RNA 2
ENSG00000243486.1	0	0	0	0.05	0	0	RP11-217E22.5	chr3	lncRNA	--
ENSG00000127328.22	0.78	0.87	0.83	1.39	1.31	1.32	RAB3IP	chr12	protein_coding	RAB3A interacting protein
ENSG00000128422.17	1.4	0.85	0.72	0.8	1.01	0.67	KRT17	chr17	protein_coding	keratin 17
ENSG00000130985.17	62.72	62.03	67.11	70.19	70.72	71.75	UBA1	chrX	protein_coding	ubiquitin like modifier activating enzyme 1
ENSG00000158161.16	1.31	1.3	1.13	1.49	1.51	1.44	EYA3	chr1	protein_coding	EYA transcriptional coactivator and phosphatase 3
ENSG00000135637.14	0.79	0.76	0.77	1.13	0.78	0.97	CCDC142	chr2	protein_coding	coiled-coil domain containing 142
ENSG00000214199.3	0.21	0.22	0.21	0.22	0.23	0.2	EEF1A1P12	chr2	processed_pseudogene	eukaryotic translation elongation factor 1 alpha 1 pseudogene 12
ENSG00000267680.5	0.8	0.83	0.63	0.66	0.7	0.59	ZNF224	chr19	protein_coding	zinc finger protein 224
ENSG00000278472.1	0.41	0.39	0.13	0.14	0.14	0.07	RP11-74D7.3	chr15	lncRNA	--
ENSG00000073169.14	11.57	11.25	12.58	10.17	9.3	10.28	SELENOO	chr22	protein_coding	selenoprotein O
ENSG00000287012.1	0.09	0.11	0.02	0.12	0.02	0.05	RP11-816B4.3	chr3	lncRNA	--
ENSG00000226043.2	0.04	0.08	0.08	0.08	0.06	0.19	AP000705.7	chr21	lncRNA	--
ENSG00000253837.1	0.26	0.31	0.27	0.41	0.28	0.26	RP11-177H13.2	chr8	lncRNA	--
ENSG00000163507.14	4.43	4.99	4.71	6.11	5.46	5.61	CIP2A	chr3	protein_coding	cellular inhibitor of PP2A
ENSG00000087586.18	46.7	45.85	46.55	59.85	62.68	62.37	AURKA	chr20	protein_coding	aurora kinase A
ENSG00000275888.1	0.39	0.51	0.5	0.52	0.4	0.37	RP13-516M14.10	chr17	lncRNA	--
ENSG00000165406.16	3.65	3.36	3.35	2.35	2.68	2.44	MARCHF8	chr10	protein_coding	membrane associated ring-CH-type finger 8
ENSG00000260549.2	0.08	0	0	0	0	0	MT1L	chr16	transcribed_unprocessed_pseudogene	metallothionein 1L, pseudogene
ENSG00000234500.1	0	0	0	0.05	0	0.05	GS1-124K5.10	chr7	unprocessed_pseudogene	--
ENSG00000230154.1	0	0.03	0.06	0.04	0.1	0	AIDAP1	chr2	processed_pseudogene	AIDA pseudogene 1
ENSG00000261832.6	12.61	12.36	12.99	10.66	10.92	11.33	RP11-435I10.4	chr16	protein_coding	--
ENSG00000206937.1	0	0.43	0	0	0	0	SNORA70B	chr2	snoRNA	small nucleolar RNA, H/ACA box 70B
ENSG00000185839.3	0.04	0.09	0.04	0.05	0.09	0.05	RP4-592A1.2	chr1	processed_pseudogene	--
ENSG00000151131.11	0.43	0.48	0.45	0.57	0.58	0.6	C12orf45	chr12	protein_coding	--
ENSG00000251442.6	0.1	0.17	0.12	0.27	0.24	0.36	LINC01094	chr4	lncRNA	long intergenic non-protein coding RNA 1094
ENSG00000277739.1	0	0.19	0	0.42	0.41	1.52	5_8S_rRNA	chr21	rRNA	--
ENSG00000228941.1	0.01	0	0	0	0	0	UBE3AP2	chr21	processed_pseudogene	ubiquitin protein ligase E3A pseudogene 2
ENSG00000170100.14	0.4	0.38	0.4	0.44	0.36	0.47	ZNF778	chr16	protein_coding	zinc finger protein 778
ENSG00000277702.1	0	0	0	0.15	0	0	CH17-13I23.3	chr1	unprocessed_pseudogene	--
ENSG00000280194.1	0	0.01	0.01	0	0	0	AD000864.6	chr19	TEC	--
ENSG00000147206.17	0.06	0.08	0.08	0.16	0.11	0.15	NXF3	chrX	protein_coding	nuclear RNA export factor 3
ENSG00000266401.2	0.11	0.13	0.18	0.24	0.16	0.13	RP11-874J12.4	chr18	lncRNA	--
ENSG00000269815.1	0.19	0.06	0.06	0.65	0.19	0.33	CTD-2278I10.4	chr19	lncRNA	--
ENSG00000261481.1	0	0	0	0.13	0	0	CARHSP1-DT	chr16	lncRNA	CARHSP1 divergent transcript
ENSG00000260997.1	0.02	0.02	0.02	0.03	0	0.02	RP4-647J21.1	chr7	lncRNA	--
ENSG00000253972.6	0.08	0.04	0.07	0.26	0.3	0.31	MAL2-AS1	chr8	lncRNA	MAL2 antisense RNA 1
ENSG00000179304.17	0.03	0.03	0.04	0.05	0.02	0.04	FAM156B	chrX	protein_coding	family with sequence similarity 156 member B
ENSG00000078596.11	0.03	0.03	0.08	0.06	0.05	0.05	ITM2A	chrX	protein_coding	integral membrane protein 2A
ENSG00000226015.2	0.15	0.19	0.14	0.18	0.36	0.18	CCT8P1	chr1	processed_pseudogene	chaperonin containing TCP1 subunit 8 pseudogene 1
ENSG00000120833.14	2.45	2.38	1.98	2.37	2.04	2.34	SOCS2	chr12	protein_coding	suppressor of cytokine signaling 2
ENSG00000104626.15	5.35	4.56	4.6	4.55	4.71	4.19	ERI1	chr8	protein_coding	exoribonuclease 1
ENSG00000050327.15	1.69	1.75	1.81	2.74	2.94	2.97	ARHGEF5	chr7	protein_coding	Rho guanine nucleotide exchange factor 5
ENSG00000256464.1	0.13	0.21	0.12	0.09	0.31	0.14	YWHABP2	chr11	processed_pseudogene	tyrosine 3-monooxygenase/tryptophan 5-monooxygenase activation protein beta pseudogene 2
ENSG00000080839.12	5.15	5.42	5.03	3.62	3.64	3.42	RBL1	chr20	protein_coding	RB transcriptional corepressor like 1
ENSG00000107872.14	5.74	5.9	6.07	7.53	7.01	7.92	FBXL15	chr10	protein_coding	F-box and leucine rich repeat protein 15
ENSG00000204991.11	1.12	0.99	1.08	1.05	1.03	1.04	SPIRE2	chr16	protein_coding	spire type actin nucleation factor 2
ENSG00000255723.1	25.84	24.29	24.6	20.16	21.33	21.17	RP11-529H2.2	chr4	lncRNA	--
ENSG00000243824.1	0.25	0.06	0	0.07	0	0	RPL12P6	chr14	processed_pseudogene	ribosomal protein L12 pseudogene 6
ENSG00000267416.1	0.22	0.04	0.41	0.19	0.18	0.05	HEATR6-DT	chr17	lncRNA	HEATR6 divergent transcript
ENSG00000121022.14	4.79	4.59	4.66	5.03	4.9	4.6	COPS5	chr8	protein_coding	COP9 signalosome subunit 5
ENSG00000259153.2	4.8	5.19	5.2	7.32	7.82	7.44	RP6-65G23.3	chr14	lncRNA	--
ENSG00000223546.7	0.19	0.17	0.24	0.18	0.17	0.18	LINC00630	chrX	lncRNA	long intergenic non-protein coding RNA 630
ENSG00000188467.11	0.03	0.05	0.02	0.03	0.03	0.01	SLC24A5	chr15	protein_coding	solute carrier family 24 member 5
ENSG00000230257.5	0.64	0.47	0.65	0.73	0.82	0.71	NFE4	chr7	lncRNA	nuclear factor, erythroid 4
ENSG00000108107.15	120.03	120.16	124.86	130.34	128.65	136.61	RPL28	chr19	protein_coding	ribosomal protein L28
ENSG00000273064.1	0.13	0.12	0.21	0.1	0.13	0.24	RP11-474G23.3	chr2	lncRNA	--
ENSG00000279500.1	0.02	0.06	0.02	0.02	0.04	0.06	RP11-21K12.2	chr12	TEC	--
ENSG00000253530.2	0.17	0.04	0	0	0.08	0.04	RP11-103H7.3	chr8	lncRNA	--
ENSG00000166446.15	1.06	1.16	1.29	0.89	0.84	0.83	CDYL2	chr16	protein_coding	chromodomain Y like 2
ENSG00000138623.10	3.22	3.61	3.72	12.99	13.14	13.65	SEMA7A	chr15	protein_coding	semaphorin 7A (John Milton Hagen blood group)
ENSG00000131127.14	0.61	0.57	0.54	0.55	0.53	0.5	ZNF141	chr4	protein_coding	zinc finger protein 141
ENSG00000273734.1	3.25	3.35	3.61	2.94	3.11	3.4	LLfos-48D6.2	chr19	protein_coding	--
ENSG00000127362.2	0	0	0	0.03	0	0	TAS2R3	chr7	protein_coding	taste 2 receptor member 3
ENSG00000284772.1	0.04	0.05	0.05	0.02	0.02	0	RP11-315A19.1	chr15	protein_coding	--
ENSG00000100554.12	19.11	19.88	19.86	22.57	23.69	21.67	ATP6V1D	chr14	protein_coding	ATPase H+ transporting V1 subunit D
ENSG00000123901.9	0.15	0.1	0.2	0.14	0.07	0.09	GPR83	chr11	protein_coding	G protein-coupled receptor 83
ENSG00000270277.1	0.17	0.38	0.34	0.23	0.11	0.22	RP11-65L3.2	chr2	lncRNA	--
ENSG00000113302.5	0.03	0.01	0.01	0	0.04	0	IL12B	chr5	protein_coding	interleukin 12B
ENSG00000212993.5	0.01	0	0	0.01	0	0	POU5F1B	chr8	protein_coding	POU class 5 homeobox 1B
ENSG00000153902.14	0	0.02	0	0	0	0.01	LGI4	chr19	protein_coding	leucine rich repeat LGI family member 4
ENSG00000132821.12	54.59	51.38	55.23	39	40.1	40.53	VSTM2L	chr20	protein_coding	V-set and transmembrane domain containing 2 like
ENSG00000263590.2	0	0	0.01	0	0.01	0.04	LINC02591	chr1	lncRNA	long intergenic non-protein coding RNA 2591
ENSG00000100360.15	0.57	0.59	0.69	0.55	0.57	0.58	IFT27	chr22	protein_coding	intraflagellar transport 27
ENSG00000111231.9	10.33	9.78	9.26	10.69	12.75	11.03	GPN3	chr12	protein_coding	GPN-loop GTPase 3
ENSG00000262402.1	0.07	0.06	0.12	0	0.13	0.07	MCUR1P1	chr17	processed_pseudogene	MCUR1 pseudogene 1
ENSG00000266728.5	0.3	0.16	0.67	0.44	0.48	0.18	AC015688.3	chr17	protein_coding	--
ENSG00000201610.1	0	0	0	0.3	0	0	RNA5SP84	chr2	rRNA_pseudogene	RNA, 5S ribosomal pseudogene 84
ENSG00000284669.1	0	0.02	0	0.01	0.01	0	RP11-331G2.8	chr3	lncRNA	--
ENSG00000155393.13	3.85	3.68	3.62	2.82	3.2	2.72	HEATR3	chr16	protein_coding	HEAT repeat containing 3
ENSG00000234776.5	0.12	0.23	0.19	0.21	0.17	0.35	C11orf94	chr11	protein_coding	chromosome 11 open reading frame 94
ENSG00000180488.15	2.37	2.27	1.79	1.41	1.36	1.52	MIGA1	chr1	protein_coding	mitoguardin 1
ENSG00000257639.1	0	0	0	0.06	0.05	0.12	CTB-31N19.2	chr16	unprocessed_pseudogene	--
ENSG00000111716.14	7.73	7.96	5.52	5.24	5.13	4.38	LDHB	chr12	protein_coding	lactate dehydrogenase B
ENSG00000128731.18	1.51	1.56	1.57	1.63	1.61	1.53	HERC2	chr15	protein_coding	HECT and RLD domain containing E3 ubiquitin protein ligase 2
ENSG00000127663.15	2.16	2.16	2.27	2.18	1.95	1.93	KDM4B	chr19	protein_coding	lysine demethylase 4B
ENSG00000037042.9	4.38	4.69	4.7	5.66	4.49	5.17	TUBG2	chr17	protein_coding	tubulin gamma 2
ENSG00000262730.1	54.6	56.05	55.39	52.17	51.47	58.65	RP11-1099M24.7	chr17	protein_coding	--
ENSG00000286650.1	0.07	0.12	0	0.31	0	0.14	RP3-438D16.4	chrX	lncRNA	--
ENSG00000236449.2	0	0.01	0	0	0	0.01	AC018890.6	chr2	lncRNA	--
ENSG00000065600.13	4.24	4.41	4.32	5.74	5.95	5.88	PACC1	chr1	protein_coding	proton activated chloride channel 1
ENSG00000121933.19	0	0.01	0.01	0.07	0.03	0.01	TMIGD3	chr1	protein_coding	transmembrane and immunoglobulin domain containing 3
ENSG00000258471.2	0.78	0.62	0.37	0.47	0.5	0.33	RP11-84C10.4	chr14	lncRNA	--
ENSG00000269903.1	0.36	0.47	0.33	0.3	0.07	0.15	RP11-571M6.18	chr12	lncRNA	--
ENSG00000228933.8	0	0	0	0	0.01	0	RP11-268G12.1	chrX	lncRNA	--
ENSG00000161513.12	2.4	2.76	2.4	2.48	2.32	2.37	FDXR	chr17	protein_coding	ferredoxin reductase
ENSG00000247572.8	0.24	0.29	0.24	0.35	0.37	0.34	CKMT2-AS1	chr5	lncRNA	CKMT2 antisense RNA 1
ENSG00000211513.5	0	0	0	0.61	0	0	MIR320E	chr19	miRNA	microRNA 320e
ENSG00000169609.14	0.95	0.96	0.91	0.92	1	0.93	C15orf40	chr15	protein_coding	chromosome 15 open reading frame 40
ENSG00000233559.2	0.07	0.06	0.05	0.04	0.09	0.1	LINC00513	chr7	lncRNA	long intergenic non-protein coding RNA 513
ENSG00000056050.7	16.06	16.67	15.87	13.2	14.7	13.63	HPF1	chr4	protein_coding	histone PARylation factor 1
ENSG00000142405.22	0.02	0.01	0	0	0.01	0	NLRP12	chr19	protein_coding	NLR family pyrin domain containing 12
ENSG00000187118.14	3.12	3.05	3.07	3.07	2.71	2.6	CMC1	chr3	protein_coding	C-X9-C motif containing 1
ENSG00000170178.7	0.04	0.03	0.04	0.01	0.01	0.01	HOXD12	chr2	protein_coding	homeobox D12
ENSG00000176058.13	4.66	4.6	5.11	5.88	6.01	6.73	TPRN	chr9	protein_coding	taperin
ENSG00000141294.10	0.22	0.21	0.28	0.24	0.32	0.33	LRRC46	chr17	protein_coding	leucine rich repeat containing 46
ENSG00000242588.6	0.24	0.15	0.17	0.29	0.14	0.17	RP11-274B21.14	chr7	lncRNA	--
ENSG00000279765.3	0.5	0.61	0.64	0.79	0.67	0.84	RP11-437B10.1	chr15	protein_coding	--
ENSG00000236829.9	0.18	0.27	0.21	0.28	0.3	0.25	Z97634.3	chr16	transcribed_processed_pseudogene	--
ENSG00000124743.6	0.03	0.06	0.03	0.05	0.02	0.04	KLHL31	chr6	protein_coding	kelch like family member 31
ENSG00000243811.12	0.02	0	0.05	0.04	0.06	0.05	APOBEC3D	chr22	protein_coding	apolipoprotein B mRNA editing enzyme catalytic subunit 3D
ENSG00000264112.1	1.34	1.38	1.03	1.33	0.94	1	RP11-159D12.2	chr17	lncRNA	--
ENSG00000197467.17	8.27	8.81	8.22	7.42	7.52	7.51	COL13A1	chr10	protein_coding	collagen type XIII alpha 1 chain
ENSG00000172159.16	0.49	0.52	0.58	0.39	0.42	0.41	FRMD3	chr9	protein_coding	FERM domain containing 3
ENSG00000149573.9	0.05	0.04	0.02	1.57	1.3	1.72	MPZL2	chr11	protein_coding	myelin protein zero like 2
ENSG00000198643.7	0	0	0.04	0.02	0.06	0.04	FAM3D	chr3	protein_coding	FAM3 metabolism regulating signaling molecule D
ENSG00000259694.1	0	0	0	0	0	0.06	RP13-262C2.3	chr15	lncRNA	--
ENSG00000269043.2	0	0	0	0	0.03	0	CTC-513N18.6	chr19	lncRNA	--
ENSG00000160563.14	10.1	10.84	11.13	11.32	12.4	12.57	MED27	chr9	protein_coding	mediator complex subunit 27
ENSG00000273171.1	0.55	0.24	0.68	0.08	0.04	0.16	CTB-96E2.2	chr17	protein_coding	--
ENSG00000197520.10	0.02	0	0	0.01	0.01	0	FAM177B	chr1	protein_coding	family with sequence similarity 177 member B
ENSG00000259928.1	0	0	0	0.02	0	0	RP11-218M11.1	chr17	lncRNA	--
ENSG00000230309.1	0	0.08	0.07	0.25	0.08	0.17	RP3-390M24.1	chr6	lncRNA	--
ENSG00000156384.15	10.69	10.04	10.93	15.08	14.37	12.77	SFR1	chr10	protein_coding	SWI5 dependent homologous recombination repair protein 1
ENSG00000227288.3	0	0	0	0	0.02	0	ARID3BP1	chr1	processed_pseudogene	ARID3B pseudogene 1
ENSG00000197956.10	5446.93	5230.19	4883.22	3391.35	3617.75	3568.12	S100A6	chr1	protein_coding	S100 calcium binding protein A6
ENSG00000261455.1	7.34	8.35	8.07	6.14	6.19	6.63	LINC01003	chr7	lncRNA	long intergenic non-protein coding RNA 1003
ENSG00000225407.3	0	0	0.1	0	0	0	CTD-2384B11.2	chr5	lncRNA	--
ENSG00000173838.12	0.02	0.02	0.01	0.06	0	0.05	MARCHF10	chr17	protein_coding	membrane associated ring-CH-type finger 10
ENSG00000243071.1	0.19	0.18	0	0	0	0.14	RP11-613M5.2	chr12	processed_pseudogene	--
ENSG00000270959.1	0.53	0.5	0.67	0.66	0.62	0.46	LPP-AS2	chr3	lncRNA	LPP antisense RNA 2
ENSG00000066336.12	0.2	0.16	0.21	0.17	0.28	0.44	SPI1	chr11	protein_coding	Spi-1 proto-oncogene
ENSG00000254815.6	0.06	0.12	0.04	0.15	0.12	0.1	LMNTD2-AS1	chr11	lncRNA	LMNTD2 antisense RNA 1
ENSG00000074582.15	5.07	5.4	5.27	6.29	6.34	6.66	BCS1L	chr2	protein_coding	BCS1 homolog, ubiquinol-cytochrome c reductase complex chaperone
ENSG00000276564.1	0.22	0.2	0.14	0.13	0.13	0.14	CTA-276F8.1	chr16	lncRNA	--
ENSG00000232739.1	0.08	0.07	0	0.04	0	0.08	RP11-25G10.2	chr10	lncRNA	--
ENSG00000213205.3	0.02	0.02	0	0	0	0	STRADBP1	chr7	processed_pseudogene	STE20-related kinase adaptor beta pseudogene 1
ENSG00000259209.3	0.18	0.09	0.07	0.04	0.04	0.04	RP5-991G20.2	chr16	lncRNA	--
ENSG00000232334.1	0.06	0.06	0	0.19	0	0.13	RP11-47G11.2	chr10	processed_pseudogene	--
ENSG00000102078.16	3.49	3.75	3.93	3.47	4.28	3.52	SLC25A14	chrX	protein_coding	solute carrier family 25 member 14
ENSG00000101194.18	9.01	9.04	9.82	11.64	10.62	11.61	SLC17A9	chr20	protein_coding	solute carrier family 17 member 9
ENSG00000171467.16	2.39	2.45	2.39	2.55	2.58	2.39	ZNF318	chr6	protein_coding	zinc finger protein 318
ENSG00000174912.7	0.09	0.03	0.11	0.06	0	0.1	METTL15P1	chr3	processed_pseudogene	methyltransferase like 15 pseudogene 1
ENSG00000187068.3	0.01	0.02	0.03	0.03	0.06	0.02	C3orf70	chr3	protein_coding	chromosome 3 open reading frame 70
ENSG00000250988.7	3.59	3.26	2.68	2.4	3.83	2.96	SNHG21	chr15	lncRNA	small nucleolar RNA host gene 21
ENSG00000221507.1	0	0.21	0	0	0	0	RNU6ATAC40P	chr7	snRNA	RNA, U6atac small nuclear 40, pseudogene
ENSG00000197694.18	12.55	12.27	12.62	14.26	14.55	14.97	SPTAN1	chr9	protein_coding	spectrin alpha, non-erythrocytic 1
ENSG00000238180.1	0	0	0	0.07	0	0	RPL21P34	chr2	processed_pseudogene	ribosomal protein L21 pseudogene 34
ENSG00000255239.2	0	0	0	0	0.06	0	TREHP1	chr11	unprocessed_pseudogene	trehalase pseudogene 1
ENSG00000230944.1	0	0	0	0	0.11	0	AC026202.5	chr3	lncRNA	--
ENSG00000196275.15	0.19	0.2	0.23	0.12	0.19	0.19	GTF2IRD2	chr7	protein_coding	GTF2I repeat domain containing 2
ENSG00000269867.1	0.18	0.13	0.25	0.24	0.19	0.05	CTD-2583A14.8	chr19	lncRNA	--
ENSG00000114978.18	14.63	14.2	14.41	15.32	16.25	15.78	MOB1A	chr2	protein_coding	MOB kinase activator 1A
ENSG00000244968.7	0.14	0.11	0.12	0.14	0.1	0.1	LIFR-AS1	chr5	lncRNA	LIFR antisense RNA 1
ENSG00000124193.16	29.9	30.16	30.93	29.69	30	29.63	SRSF6	chr20	protein_coding	serine and arginine rich splicing factor 6
ENSG00000225644.1	0.3	0	0	0	0	0	RPL35AP4	chr6	processed_pseudogene	ribosomal protein L35a pseudogene 4
ENSG00000140564.13	23.05	21.06	23.76	22.2	21.8	21.91	FURIN	chr15	protein_coding	furin, paired basic amino acid cleaving enzyme
ENSG00000166002.7	11.41	11.32	11.83	10.23	10.38	9.62	SMCO4	chr11	protein_coding	single-pass membrane protein with coiled-coil domains 4
ENSG00000284032.1	0	0	0	0	0.49	0.52	MIR29A	chr7	miRNA	microRNA 29a
ENSG00000105672.14	0.65	0.65	0.63	0.38	0.34	0.59	ETV2	chr19	protein_coding	ETS variant transcription factor 2
ENSG00000249348.1	0.32	0.13	0.24	0.24	0.18	0.21	UGDH-AS1	chr4	lncRNA	UGDH antisense RNA 1
ENSG00000130939.20	3.39	3.4	3.63	3.51	3.53	3.54	UBE4B	chr1	protein_coding	ubiquitination factor E4B
ENSG00000100731.16	1.36	1.37	1.51	1.61	1.71	1.55	PCNX1	chr14	protein_coding	pecanex 1
ENSG00000211897.9	0.06	0	0.03	0	0.03	0.01	IGHG3	chr14	IG_C_gene	immunoglobulin heavy constant gamma 3 (G3m marker)
ENSG00000234690.7	0.16	0.16	0.14	0.13	0.1	0.1	EPCAM-DT	chr2	lncRNA	EPCAM divergent transcript
ENSG00000262362.1	0	0.05	0	0.21	0	0.05	LA16c-380H5.2	chr16	lncRNA	--
ENSG00000132026.15	0.06	0.02	0.04	0.13	0.08	0.1	RTBDN	chr19	protein_coding	retbindin
ENSG00000237250.3	0	0	0	0	0	0.01	RP11-193H5.1	chr1	lncRNA	--
ENSG00000253270.1	0	0	0	0	0.07	0.07	RP11-1105O14.1	chr8	lncRNA	--
ENSG00000231714.1	0	0	0	0	0.14	0	RP11-476H20.1	chr1	lncRNA	--
ENSG00000275359.1	0.53	0	0.25	0	0	0.57	ENSG10010138280.1	chr7	misc_RNA	--
ENSG00000200674.1	0	0	0	0.1	0	0.1	RN7SKP160	chr1	misc_RNA	RN7SK pseudogene 160
ENSG00000118849.10	0.44	0.27	0.57	0.16	0.09	0.02	RARRES1	chr3	protein_coding	retinoic acid receptor responder 1
ENSG00000270006.2	1.24	0.8	1.08	1.37	1.02	0.91	C16orf95-DT	chr16	lncRNA	C16orf95 divergent transcript
ENSG00000214132.4	0.02	0	0.02	0	0.02	0.02	RP11-420O16.2	chr5	processed_pseudogene	--
ENSG00000184465.16	0.29	0.34	0.22	0.36	0.33	0.28	WDR27	chr6	protein_coding	WD repeat domain 27
ENSG00000221946.8	0.03	0.11	0.03	0.02	0.05	0.06	FXYD7	chr19	protein_coding	FXYD domain containing ion transport regulator 7
ENSG00000251079.6	0.04	0.04	0.05	0.03	0.03	0.02	BMS1P2	chr10	transcribed_unprocessed_pseudogene	BMS1 pseudogene 2
ENSG00000109270.13	9.57	9.14	8.2	7.37	7.94	7.4	LAMTOR3	chr4	protein_coding	late endosomal/lysosomal adaptor, MAPK and MTOR activator 3
ENSG00000137218.10	2.62	2.46	2.31	2.97	2.86	2.82	FRS3	chr6	protein_coding	fibroblast growth factor receptor substrate 3
ENSG00000005882.12	6.9	6.39	6.59	5.05	4.72	4.63	PDK2	chr17	protein_coding	pyruvate dehydrogenase kinase 2
ENSG00000104450.13	5.8	5.24	5.3	6.07	6.16	5.94	SPAG1	chr8	protein_coding	sperm associated antigen 1
ENSG00000246876.7	0	0	0	0	0.01	0	LINC02466	chr4	lncRNA	long intergenic non-protein coding RNA 2466
ENSG00000247317.3	0.27	0.26	0.33	0.27	0.41	0.21	LY6E-DT	chr8	lncRNA	LY6E divergent transcript
ENSG00000234286.1	0	0	0	0	0.22	0	AC006026.13	chr7	lncRNA	--
ENSG00000275092.1	0.34	0.12	0.2	0.18	0.09	0.28	LA16c-329F2.2	chr16	lncRNA	--
ENSG00000180376.17	0.72	0.82	0.74	1.04	0.98	0.9	CCDC66	chr3	protein_coding	coiled-coil domain containing 66
ENSG00000168484.13	0	0	0.03	0	0	0	SFTPC	chr8	protein_coding	surfactant protein C
ENSG00000163536.13	0.28	0.18	0.27	0.85	0.73	0.95	SERPINI1	chr3	protein_coding	serpin family I member 1
ENSG00000112297.18	0.86	0.95	0.89	1.96	1.92	1.85	CRYBG1	chr6	protein_coding	crystallin beta-gamma domain containing 1
ENSG00000238058.2	0.96	1.36	1.03	1.16	1.13	0.75	RP11-432J22.2	chr9	lncRNA	--
ENSG00000242247.11	9.76	9.79	9.19	9.83	9.11	9.23	ARFGAP3	chr22	protein_coding	ADP ribosylation factor GTPase activating protein 3
ENSG00000196301.3	0	0.09	0	0.19	0.09	0	HLA-DRB9	chr6	unprocessed_pseudogene	major histocompatibility complex, class II, DR beta 9 (pseudogene)
ENSG00000163040.15	2.2	2.36	2.4	0.99	1.38	1.2	CCDC74A	chr2	protein_coding	coiled-coil domain containing 74A
ENSG00000264443.1	0.06	0.1	0.2	0.02	0.02	0.02	NCMAP-DT	chr1	lncRNA	NCMAP divergent transcript
ENSG00000207205.1	0	0.53	0.87	1.18	1.15	0.8	RNVU1-15	chr1	snRNA	RNA, variant U1 small nuclear 15
ENSG00000167074.15	1.63	1.45	1.53	1.28	1.24	1.13	TEF	chr22	protein_coding	TEF transcription factor, PAR bZIP family member
ENSG00000130147.16	9.09	9.39	9.45	7.08	7.35	7.2	SH3BP4	chr2	protein_coding	SH3 domain binding protein 4
ENSG00000217555.13	61.14	61.44	68.57	56.72	58.18	58.13	CKLF	chr16	protein_coding	chemokine like factor
ENSG00000105229.7	8.65	8.12	9.59	9.35	9.64	10.25	PIAS4	chr19	protein_coding	protein inhibitor of activated STAT 4
ENSG00000125409.13	0.05	0.01	0.06	0.04	0.06	0.03	TEKT3	chr17	protein_coding	tektin 3
ENSG00000100314.4	0.2	0.2	0.21	0.18	0.09	0.15	CABP7	chr22	protein_coding	calcium binding protein 7
ENSG00000147485.13	0	0	0	0	0.01	0	PXDNL	chr8	protein_coding	peroxidasin like
ENSG00000239719.1	0.34	0	0.16	0	0.17	0	RP4-800G7.1	chr7	processed_pseudogene	--
ENSG00000133136.5	0.02	0	0	0	0	0	GNG5P2	chrX	protein_coding	G protein subunit gamma 5 pseudogene 2
ENSG00000169683.8	5.28	5.19	4.6	4.5	4.46	5.05	LRRC45	chr17	protein_coding	leucine rich repeat containing 45
ENSG00000235488.1	0.48	0.19	0.19	0.36	0.35	0.36	JARID2-AS1	chr6	lncRNA	JARID2 antisense RNA 1
ENSG00000287089.1	0.04	0	0.04	0	0	0	RP3-468B3.6	chr6	lncRNA	--
ENSG00000147010.18	17.3	18	18.51	17.4	17.34	17.98	SH3KBP1	chrX	protein_coding	SH3 domain containing kinase binding protein 1
ENSG00000167325.15	26.97	27.82	26.23	28.28	31.45	29.8	RRM1	chr11	protein_coding	ribonucleotide reductase catalytic subunit M1
ENSG00000151062.15	0.02	0.03	0.02	0.02	0.02	0.01	CACNA2D4	chr12	protein_coding	calcium voltage-gated channel auxiliary subunit alpha2delta 4
ENSG00000287467.1	0	0	0.02	0	0	0.03	RP11-582J16.7	chr8	lncRNA	--
ENSG00000185668.8	0.01	0	0	0	0	0.01	POU3F1	chr1	protein_coding	POU class 3 homeobox 1
ENSG00000066379.15	5.28	5.66	5.13	6.96	6.89	6.82	POLR1H	chr6	protein_coding	RNA polymerase I subunit H
ENSG00000152495.11	0.18	0.18	0.16	0.25	0.24	0.24	CAMK4	chr5	protein_coding	calcium/calmodulin dependent protein kinase IV
ENSG00000226047.1	0.09	0	0	0	0	0	RP11-196I18.4	chr9	lncRNA	--
ENSG00000187144.11	0.7	0.74	0.47	0.62	0.35	0.47	SPATA21	chr1	protein_coding	spermatogenesis associated 21
ENSG00000070950.10	3.99	4.41	4.58	4.68	4.69	4.44	RAD18	chr3	protein_coding	RAD18 E3 ubiquitin protein ligase
ENSG00000183625.16	0.36	0.29	0.33	0.35	0.29	0.4	CCR3	chr3	protein_coding	C-C motif chemokine receptor 3
ENSG00000285762.1	0	0	0	0	0.04	0	CH17-476P10.1	chr22	protein_coding	--
ENSG00000233532.6	0.3	0.27	0.31	0.27	0.25	0.39	LINC00460	chr13	lncRNA	long intergenic non-protein coding RNA 460
ENSG00000259469.1	0.11	0.27	0.05	0.18	0.23	0.31	RP11-227D13.4	chr15	lncRNA	--
ENSG00000134824.14	20.91	21.71	22.93	12.73	12.34	12.87	FADS2	chr11	protein_coding	fatty acid desaturase 2
ENSG00000276107.1	3.26	3.56	3.54	1.02	1.51	2.17	THBS1-IT1	chr15	lncRNA	THBS1 intronic transcript 1
ENSG00000071082.11	102.73	105.79	104.15	84.06	88.11	87.18	RPL31	chr2	protein_coding	ribosomal protein L31
ENSG00000273559.5	5.96	6.41	5.2	5.33	5.42	5.31	CWC25	chr17	protein_coding	CWC25 spliceosome associated protein homolog
ENSG00000227199.1	1.08	1.44	1.3	1.63	1.55	1.88	ST7-AS1	chr7	lncRNA	ST7 antisense RNA 1
ENSG00000149571.12	0	0	0.01	0.05	0.01	0.03	KIRREL3	chr11	protein_coding	kirre like nephrin family adhesion molecule 3
ENSG00000144567.11	17.18	16.25	16.75	15.45	15.63	16.48	RETREG2	chr2	protein_coding	reticulophagy regulator family member 2
ENSG00000116032.5	0.06	0.06	0.03	0.02	0.03	0.05	GRIN3B	chr19	protein_coding	glutamate ionotropic receptor NMDA type subunit 3B
ENSG00000255775.1	0	0	0	0	0.05	0	RP3-454B23.1	chr12	lncRNA	--
ENSG00000248671.8	0.04	0.02	0.02	0.02	0.02	0.01	ALG1L9P	chr11	lncRNA	ALG1 like 9, pseudogene
ENSG00000100916.14	3.5	3.94	3.89	4.35	4.85	4.57	BRMS1L	chr14	protein_coding	BRMS1 like transcriptional repressor
ENSG00000224376.1	0.47	0.39	0.4	0.32	0.34	0.29	AC017104.6	chr2	lncRNA	--
ENSG00000115839.18	7.07	6.94	7.49	5.75	6.13	6.04	RAB3GAP1	chr2	protein_coding	RAB3 GTPase activating protein catalytic subunit 1
ENSG00000198464.14	3.63	3.43	3.94	3.41	3.75	3.52	ZNF480	chr19	protein_coding	zinc finger protein 480
ENSG00000254303.1	0	0	0	0.04	0.2	0	RP11-398G24.2	chr8	lncRNA	--
ENSG00000182533.7	0.05	0.06	0.09	0.07	0.06	0.02	CAV3	chr3	protein_coding	caveolin 3
ENSG00000156482.11	175.99	184.38	183.72	170.24	173.35	170.43	RPL30	chr8	protein_coding	ribosomal protein L30
ENSG00000271327.1	0.08	0.14	0.12	0	0.02	0.02	RP11-1109F11.3	chr12	lncRNA	--
ENSG00000245571.7	0.29	0.31	0.35	0.46	0.48	0.52	FAM111A-DT	chr11	lncRNA	FAM111A divergent transcript
ENSG00000287315.1	0.01	0.01	0.01	0.02	0.01	0	RP11-245P10.9	chr1	lncRNA	--
ENSG00000165506.15	5.41	4.81	4.79	5.82	5.92	6.28	DNAAF2	chr14	protein_coding	dynein axonemal assembly factor 2
ENSG00000180185.11	8.96	9.27	8.57	8.37	8.1	7.97	FAHD1	chr16	protein_coding	fumarylacetoacetate hydrolase domain containing 1
ENSG00000070081.17	5.17	5.45	5.56	4.77	4.68	4.28	NUCB2	chr11	protein_coding	nucleobindin 2
ENSG00000285162.1	0.15	0.17	0.19	0.29	0.34	0.32	RP5-1189D6.2	chr7	protein_coding	--
ENSG00000272650.1	0.62	0.3	0.29	0.22	0.53	0.44	RP11-571I18.4	chr4	lncRNA	--
ENSG00000118260.15	1.88	1.98	1.87	2.12	2.16	1.9	CREB1	chr2	protein_coding	cAMP responsive element binding protein 1
ENSG00000224189.8	1.52	1.43	1.46	4.03	4.45	3.91	HAGLR	chr2	lncRNA	HOXD antisense growth-associated long non-coding RNA
ENSG00000223544.1	0	0	0.12	0	0	0	AC005838.2	chr17	unprocessed_pseudogene	--
ENSG00000227467.3	0.03	0.05	0	0.21	0.13	0.19	LINC01537	chr11	lncRNA	long intergenic non-protein coding RNA 1537
ENSG00000241597.2	0	0	0	0	0	0.06	CTD-2007H13.1	chr5	processed_pseudogene	--
ENSG00000111215.12	1.02	1.32	1.34	0.99	1.28	0.76	PRR4	chr12	protein_coding	proline rich 4
ENSG00000197980.13	0.02	0.02	0.03	0.07	0.03	0.02	LEKR1	chr3	protein_coding	leucine, glutamate and lysine rich 1
ENSG00000119509.13	1.04	1.11	1.19	1.17	1.17	1.14	INVS	chr9	protein_coding	inversin
ENSG00000153291.16	0.93	1.21	1.01	0.66	0.46	0.52	SLC25A27	chr6	protein_coding	solute carrier family 25 member 27
ENSG00000261717.5	1.81	1	2.17	2.51	2.44	1.75	RP11-77K12.1	chr16	protein_coding	--
ENSG00000179455.10	0.06	0.02	0.02	0.07	0.07	0.05	MKRN3	chr15	protein_coding	makorin ring finger protein 3
ENSG00000104763.20	6.29	6.5	6.47	5.98	6.09	6.08	ASAH1	chr8	protein_coding	N-acylsphingosine amidohydrolase 1
ENSG00000241288.8	0.09	0.1	0.14	0.13	0.15	0.13	LINC02614	chr3	lncRNA	long intergenic non-protein coding RNA 2614
ENSG00000253955.2	0	0	0.01	0	0	0	CTB-33O18.3	chr5	lncRNA	--
ENSG00000213309.3	0.06	0	0.05	0	0.06	0	RPL9P18	chr6	processed_pseudogene	ribosomal protein L9 pseudogene 18
ENSG00000096401.8	8.43	9.1	9.56	9.71	9.9	9.61	CDC5L	chr6	protein_coding	cell division cycle 5 like
ENSG00000109790.18	7.26	7.57	7.09	8.73	8.83	8.75	KLHL5	chr4	protein_coding	kelch like family member 5
ENSG00000238142.2	1.79	1.61	1.64	1.63	1.45	1.85	RP11-108M9.4	chr1	lncRNA	--
ENSG00000149548.15	0.84	1.09	0.96	1.33	0.93	1.19	CCDC15	chr11	protein_coding	coiled-coil domain containing 15
ENSG00000228779.1	0.04	0	0	0	0	0	Z69666.2	chr16	lncRNA	--
ENSG00000235472.1	0.03	0.02	0	0.05	0.08	0	EIF4A1P7	chr13	processed_pseudogene	eukaryotic translation initiation factor 4A1 pseudogene 7
ENSG00000262165.2	0.29	0.72	0.44	0.3	0.63	0.76	C17orf114	chr17	protein_coding	chromosome 17 open reading frame 114
ENSG00000163467.12	1.75	1.5	1.63	1.66	2.12	1.93	TSACC	chr1	protein_coding	TSSK6 activating cochaperone
ENSG00000277978.1	3.16	2.84	1.73	2.12	2.15	1.99	RP11-403P17.6	chr16	lncRNA	--
ENSG00000133116.8	0.01	0	0	0	0	0	KL	chr13	protein_coding	klotho
ENSG00000260490.2	0.12	0.35	0.11	0.26	0.31	0.26	MYL12BP1	chr15	processed_pseudogene	MYL12B pseudogene 1
ENSG00000285616.1	0	0	0	0.01	0	0.01	RP11-49C20.2	chr5	lncRNA	--
ENSG00000267919.1	0	0.16	0	0	0	0	RP11-256I23.3	chr2	lncRNA	--
ENSG00000002933.9	0.01	0	0.04	0.01	0	0.02	TMEM176A	chr7	protein_coding	transmembrane protein 176A
ENSG00000168661.15	1.75	1.77	1.74	1.37	1.65	1.5	ZNF30	chr19	protein_coding	zinc finger protein 30
ENSG00000165685.9	0	0	0	0	0.02	0	TMEM52B	chr12	protein_coding	transmembrane protein 52B
ENSG00000105617.4	8.48	8.5	7.51	8.59	8.95	8.88	LENG1	chr19	protein_coding	leukocyte receptor cluster member 1
ENSG00000255893.1	0	0.1	0	0.11	0	0	RP11-685N10.1	chr11	lncRNA	--
ENSG00000129673.10	0	0.03	0.04	0.03	0	0.03	AANAT	chr17	protein_coding	aralkylamine N-acetyltransferase
ENSG00000018625.15	0.01	0.01	0	0	0.01	0.01	ATP1A2	chr1	protein_coding	ATPase Na+/K+ transporting subunit alpha 2
ENSG00000126432.14	304.81	309.41	295.13	287.61	301.43	297.52	PRDX5	chr11	protein_coding	peroxiredoxin 5
ENSG00000182676.5	0	0	0.04	0.04	0.04	0.07	PPP1R27	chr17	protein_coding	protein phosphatase 1 regulatory subunit 27
ENSG00000264278.1	1.94	2.36	2.27	2.1	2.34	2.07	ZNF236-DT	chr18	lncRNA	ZNF236 divergent transcript
ENSG00000167291.16	2.9	3.14	3.15	2.72	2.62	2.78	TBC1D16	chr17	protein_coding	TBC1 domain family member 16
ENSG00000166012.17	8.52	9.16	9.01	9.82	9.62	9.55	TAF1D	chr11	protein_coding	TATA-box binding protein associated factor, RNA polymerase I subunit D
ENSG00000167081.18	2.97	3.04	2.94	3.67	3.59	3.64	PBX3	chr9	protein_coding	PBX homeobox 3
ENSG00000243659.1	0	0.1	0	0	0.11	0	RP11-4K3__A.3	chr1	processed_pseudogene	--
ENSG00000160570.14	14.37	13.98	14.65	16.82	16.27	16.12	DEDD2	chr19	protein_coding	death effector domain containing 2
ENSG00000071462.12	8.13	8.13	7.84	8.94	9.27	8.52	BUD23	chr7	protein_coding	BUD23 rRNA methyltransferase and ribosome maturation factor
ENSG00000172465.14	17.21	17.9	16.07	15.25	16.01	16.2	TCEAL1	chrX	protein_coding	transcription elongation factor A like 1
ENSG00000252992.1	0	0	0	0.21	0	0	ENSG10010139921.1	chr11	scaRNA	--
ENSG00000184220.12	7.55	7.93	8.06	7.2	7.32	6.85	CMSS1	chr3	protein_coding	cms1 ribosomal small subunit homolog
ENSG00000124782.20	1.28	1.32	1.23	1.51	1.34	1.37	RREB1	chr6	protein_coding	ras responsive element binding protein 1
ENSG00000104833.12	0	0	0.01	0	0	0	TUBB4A	chr19	protein_coding	tubulin beta 4A class IVa
ENSG00000284734.1	0.04	0.05	0.02	0	0.04	0	RP4-620F22.3	chr1	lncRNA	--
ENSG00000211638.2	0.07	0	0	0	0	0	IGLV8-61	chr22	IG_V_gene	immunoglobulin lambda variable 8-61
ENSG00000267449.1	0	0	0	0	0.13	0	RP11-264B14.2	chr17	lncRNA	--
ENSG00000112406.5	1.92	2.08	1.84	1.58	1.67	1.56	HECA	chr6	protein_coding	hdc homolog, cell cycle regulator
ENSG00000283689.1	0.17	0.08	0.11	0.15	0.15	0.16	RP11-434E6.5	chr16	lncRNA	--
ENSG00000247381.3	0	0	0	0.01	0	0	PLUT	chr13	lncRNA	PDX1 associated lncRNA, upregulator of transcription
ENSG00000211721.2	0.15	0.07	0.07	0.16	0	0.16	TRBV6-5	chr7	TR_V_gene	T cell receptor beta variable 6-5
ENSG00000259813.1	0.73	0.28	0.14	0.3	0.74	0.47	RP5-1142A6.5	chr16	lncRNA	--
ENSG00000260659.1	0	0	0.14	0.08	0	0	RP11-46C24.6	chr16	lncRNA	--
ENSG00000286268.1	1.11	1.19	1.07	1.27	1.28	1.05	LL0XNC01-30I4.1	chrX	protein_coding	--
ENSG00000248645.1	0	0.02	0	0	0	0	RP11-366M4.6	chr4	unprocessed_pseudogene	--
ENSG00000215102.2	0	0	0	0	0	0.03	TERF1P4	chrX	processed_pseudogene	TERF1 pseudogene 4
ENSG00000213509.4	0	0	0	0.2	0	0.34	PPIAP16	chr3	processed_pseudogene	peptidylprolyl isomerase A pseudogene 16
ENSG00000211714.3	0.08	0.22	0.15	0.08	0.24	0.5	TRBV7-3	chr7	TR_V_gene	T cell receptor beta variable 7-3
ENSG00000167113.11	12.72	12.88	14.58	12.34	12.92	12.28	COQ4	chr9	protein_coding	coenzyme Q4
ENSG00000142606.16	0.12	0.17	0.2	0.23	0.2	0.22	MMEL1	chr1	protein_coding	membrane metalloendopeptidase like 1
ENSG00000112033.14	8.41	8.16	9.22	11.42	12.52	13.29	PPARD	chr6	protein_coding	peroxisome proliferator activated receptor delta
ENSG00000250731.1	1.55	1.5	1.83	1.88	2.08	1.56	TPM3P6	chr19	processed_pseudogene	tropomyosin 3 pseudogene 6
ENSG00000184206.12	0.01	0	0	0.01	0	0	GOLGA6L4	chr15	protein_coding	golgin A6 family like 4
ENSG00000248516.1	0	0	0	0.02	0	0	RP11-265O12.1	chr4	lncRNA	--
ENSG00000284664.1	0	0.03	0	0	0.02	0.03	RP11-712C19.2	chr14	lncRNA	--
ENSG00000199990.1	0.31	0	0	0	0.64	0.33	VTRNA1-1	chr5	misc_RNA	vault RNA 1-1
ENSG00000266509.1	0	0	0.27	0	0	0	MIR3934	chr6	miRNA	microRNA 3934
ENSG00000109189.13	1.77	1.51	1.55	1.62	1.67	1.67	USP46	chr4	protein_coding	ubiquitin specific peptidase 46
ENSG00000230638.4	0	0	0	0	0.01	0	RP11-486B10.4	chr1	processed_pseudogene	--
ENSG00000169375.16	2.29	2.16	2.33	2.25	2.38	2.23	SIN3A	chr15	protein_coding	SIN3 transcription regulator family member A
ENSG00000176124.15	0.81	0.82	0.81	0.81	0.8	0.76	DLEU1	chr13	lncRNA	deleted in lymphocytic leukemia 1
ENSG00000225185.3	0	0	0	0	0.06	0	PPIAP8	chr12	processed_pseudogene	peptidylprolyl isomerase A pseudogene 8
ENSG00000109618.13	0.35	0.4	0.42	0.33	0.3	0.38	SEPSECS	chr4	protein_coding	Sep (O-phosphoserine) tRNA:Sec (selenocysteine) tRNA synthase
ENSG00000143870.13	54.21	54.51	55.18	65.71	67.07	65.72	PDIA6	chr2	protein_coding	protein disulfide isomerase family A member 6
ENSG00000227484.1	0	0.06	0	0	0	0.06	XX-C283C717.1	chr22	lncRNA	--
ENSG00000119684.16	1.28	1.15	1.18	1.07	1.11	1.21	MLH3	chr14	protein_coding	mutL homolog 3
ENSG00000036672.16	0.02	0.03	0.07	0.03	0.03	0.04	USP2	chr11	protein_coding	ubiquitin specific peptidase 2
ENSG00000172232.10	0.07	0.08	0.1	0.07	0.02	0	AZU1	chr19	protein_coding	azurocidin 1
ENSG00000226053.1	0.25	0.28	0.34	0.38	0.28	0.21	LINC01776	chr1	lncRNA	long intergenic non-protein coding RNA 1776
ENSG00000263219.1	0.02	0	0	0	0	0.02	RYKP1	chr17	processed_pseudogene	RYK pseudogene 1
ENSG00000274294.1	0	0	0.05	0	0	0	RP11-20G13.5	chr15	lncRNA	--
ENSG00000104818.15	0	0	0	0.04	0	0	CGB2	chr19	protein_coding	chorionic gonadotropin subunit beta 2
ENSG00000164168.8	5.94	5.68	5.87	5.54	5.31	5.61	TMEM184C	chr4	protein_coding	transmembrane protein 184C
ENSG00000257509.1	0.12	0.11	0.11	0	0	0	RP11-762I7.4	chr12	lncRNA	--
ENSG00000182021.10	0.01	0	0.01	0	0	0.01	RP11-381O7.3	chr9	transcribed_unprocessed_pseudogene	--
ENSG00000168434.13	2.4	2.22	2.36	2.2	1.94	2.22	COG7	chr16	protein_coding	component of oligomeric golgi complex 7
ENSG00000261670.1	0	0	0.01	0.01	0	0.02	RP11-1C8.5	chr8	lncRNA	--
ENSG00000248924.2	0	0.06	0	0	0	0	RP11-481K16.2	chr4	transcribed_processed_pseudogene	--
ENSG00000163017.14	0.02	0	0	0	0.02	0.02	ACTG2	chr2	protein_coding	actin gamma 2, smooth muscle
ENSG00000277258.5	18.8	17.96	19.6	20.98	21.8	21.58	PCGF2	chr17	protein_coding	polycomb group ring finger 2
ENSG00000213297.8	0.38	0.27	0.25	0.41	0.25	0.31	ZNF625-ZNF20	chr19	protein_coding	ZNF625-ZNF20 readthrough (NMD candidate)
ENSG00000130713.16	9.26	10.4	9.72	11.67	12.73	11.58	EXOSC2	chr9	protein_coding	exosome component 2
ENSG00000134287.10	27.22	27.25	29.71	29	30.57	30.78	ARF3	chr12	protein_coding	ADP ribosylation factor 3
ENSG00000154252.12	0	0.08	0	0.07	0	0.05	GAL3ST2	chr2	protein_coding	galactose-3-O-sulfotransferase 2
ENSG00000158201.10	5.85	5.97	5.32	5.18	5.83	5.06	ABHD3	chr18	protein_coding	abhydrolase domain containing 3, phospholipase
ENSG00000171862.11	8.22	8.45	8.95	7.99	7.77	7.58	PTEN	chr10	protein_coding	phosphatase and tensin homolog
ENSG00000085978.22	5.04	5.03	4.68	3.89	3.7	3.84	ATG16L1	chr2	protein_coding	autophagy related 16 like 1
ENSG00000278887.2	0.03	0	0.03	0.03	0.03	0	RP11-347C12.4	chr16	transcribed_unprocessed_pseudogene	--
ENSG00000110047.18	48.85	47.65	50.86	59.24	58.05	60.54	EHD1	chr11	protein_coding	EH domain containing 1
ENSG00000179943.8	1.94	2.04	2.24	2.08	2.02	2.29	FIZ1	chr19	protein_coding	FLT3 interacting zinc finger 1
ENSG00000255843.1	0.11	0.1	0.05	0.06	0.05	0.17	AP000593.7	chr11	lncRNA	--
ENSG00000107679.14	0.51	0.5	0.49	0.56	0.52	0.55	PLEKHA1	chr10	protein_coding	pleckstrin homology domain containing A1
ENSG00000198312.4	0.07	0.03	0.03	0.07	0.04	0	BMS1P9	chr9	unprocessed_pseudogene	BMS1 pseudogene 9
ENSG00000240342.3	7.33	7.44	8.56	10.33	10.73	9.76	RPS2P5	chr12	processed_pseudogene	ribosomal protein S2 pseudogene 5
ENSG00000113303.12	0	0	0	0	0	0.01	BTNL8	chr5	protein_coding	butyrophilin like 8
ENSG00000169398.19	6.2	6.17	6.35	6.47	6.39	6.29	PTK2	chr8	protein_coding	protein tyrosine kinase 2
ENSG00000184226.15	0.01	0	0.01	0.01	0.01	0.01	PCDH9	chr13	protein_coding	protocadherin 9
ENSG00000183793.14	0.06	0.04	0.11	0.02	0.06	0.07	NPIPA5	chr16	protein_coding	nuclear pore complex interacting protein family member A5
ENSG00000228413.1	0	0	0	0.09	0	0	AC024937.2	chr3	processed_pseudogene	--
ENSG00000176974.20	6.83	6.62	6.37	5.33	5.82	5.35	SHMT1	chr17	protein_coding	serine hydroxymethyltransferase 1
ENSG00000269421.1	0.03	0.03	0.06	0	0	0	ZNF92P3	chr19	unprocessed_pseudogene	--
ENSG00000156110.15	14.75	15.69	15.3	15.31	15.33	15.11	ADK	chr10	protein_coding	adenosine kinase
ENSG00000140937.14	4.28	4.32	4.45	5.92	6.16	5.69	CDH11	chr16	protein_coding	cadherin 11
ENSG00000213432.2	0	0	0	0	0	0.06	RPL17P34	chr10	processed_pseudogene	ribosomal protein L17 pseudogene 34
ENSG00000204745.4	0.37	0.45	0.43	0.35	0.31	0.38	AC083899.3	chr2	unprocessed_pseudogene	--
ENSG00000170477.13	0.04	0.03	0.03	0.08	0.02	0	KRT4	chr12	protein_coding	keratin 4
ENSG00000285722.1	0	0	0	0	0.01	0	ABC10-44372100G24.1	chr22	lncRNA	--
ENSG00000101052.13	17.45	18.66	16.55	15.31	16.78	15.97	IFT52	chr20	protein_coding	intraflagellar transport 52
ENSG00000231156.1	0	0	0	0.35	0.26	0	AC093702.1	chr2	lncRNA	--
ENSG00000251495.1	1.07	0.89	0.94	1.25	1.34	1.48	PPIAP11	chr5	processed_pseudogene	peptidylprolyl isomerase A pseudogene 11
ENSG00000172273.13	2.45	2.36	2.58	2.62	2.38	2.27	HINFP	chr11	protein_coding	histone H4 transcription factor
ENSG00000106683.15	20.17	19.63	21.41	20.37	20.13	21.48	LIMK1	chr7	protein_coding	LIM domain kinase 1
ENSG00000101224.18	35.64	33.43	33.98	45.03	45.63	44.58	CDC25B	chr20	protein_coding	cell division cycle 25B
ENSG00000274653.1	0.54	0.17	0.62	0.82	0.31	0.52	RP11-347C12.11	chr16	lncRNA	--
ENSG00000065618.21	1.76	1.72	1.67	4.5	4.38	4.93	COL17A1	chr10	protein_coding	collagen type XVII alpha 1 chain
ENSG00000117419.16	20.8	21.1	21.05	21	21.51	21.31	ERI3	chr1	protein_coding	ERI1 exoribonuclease family member 3
ENSG00000197912.16	1.04	1.1	0.99	1.04	0.97	0.98	SPG7	chr16	protein_coding	SPG7 matrix AAA peptidase subunit, paraplegin
ENSG00000205106.4	0	0.05	0.09	0.05	0.05	0.05	LINC02716	chr11	lncRNA	long intergenic non-protein coding RNA 2716
ENSG00000198189.11	45.06	46.06	45.44	35.77	37.88	37.69	HSD17B11	chr4	protein_coding	hydroxysteroid 17-beta dehydrogenase 11
ENSG00000133026.13	3.43	3.82	3.83	4.02	4	4.18	MYH10	chr17	protein_coding	myosin heavy chain 10
ENSG00000161610.1	0.21	0.05	0	0	0.16	0	HCRT	chr17	protein_coding	hypocretin neuropeptide precursor
ENSG00000049769.14	3.81	3.65	3.7	3.9	4.17	3.78	PPP1R3F	chrX	protein_coding	protein phosphatase 1 regulatory subunit 3F
ENSG00000166266.14	4.56	5.08	4.56	3.89	4.2	3.91	CUL5	chr11	protein_coding	cullin 5
ENSG00000279199.1	0.03	0.03	0.06	0	0.01	0.03	RP11-749I16.3	chr17	TEC	--
ENSG00000231721.7	0.17	0.2	0.22	0.33	0.21	0.19	LINC-PINT	chr7	lncRNA	long intergenic non-protein coding RNA, p53 induced transcript
ENSG00000243024.6	0.1	0.05	0	0.06	0.09	0.09	RPS11P6	chr12	transcribed_processed_pseudogene	ribosomal protein S11 pseudogene 6
ENSG00000101843.19	24.04	23.8	22.56	21.79	24.7	23.05	PSMD10	chrX	protein_coding	proteasome 26S subunit, non-ATPase 10
ENSG00000261691.1	0.98	0.25	0.97	0.82	1.06	1.18	LA16c-366D1.3	chr16	lncRNA	--
ENSG00000104980.8	12.74	12.64	12.94	16.45	16.9	16.12	TIMM44	chr19	protein_coding	translocase of inner mitochondrial membrane 44
ENSG00000218283.2	0.32	0.39	0.3	0.27	0.23	0.38	MORF4L1P1	chr1	processed_pseudogene	mortality factor 4 like 1 pseudogene 1
ENSG00000114346.14	10.15	11.3	10.32	13.59	13.31	12.51	ECT2	chr3	protein_coding	epithelial cell transforming 2
ENSG00000248367.1	1.58	1.87	2.35	1.9	3.05	3.12	CTB-129O4.1	chr5	lncRNA	--
ENSG00000164403.15	4.79	4.43	4.68	5.4	5.3	5.07	SHROOM1	chr5	protein_coding	shroom family member 1
ENSG00000150337.14	0	0	0	0.03	0.01	0	FCGR1A	chr1	protein_coding	Fc fragment of IgG receptor Ia
ENSG00000273514.2	0.01	0	0.01	0	0	0	FOXD4L6	chr9	protein_coding	forkhead box D4 like 6
ENSG00000255850.2	0.17	0.14	0.14	0.28	0.15	0.2	RXYLT1-AS1	chr12	lncRNA	RXYLT1 antisense RNA 1
ENSG00000272604.1	0.48	0.41	0.27	0.45	0.45	0.4	RP11-251G23.5	chr7	lncRNA	--
ENSG00000272489.1	0	0	0.02	0	0.04	0	RP11-182L21.5	chr10	lncRNA	--
ENSG00000251455.1	0	0.02	0.06	0.01	0.05	0.04	RP11-164P12.3	chr4	lncRNA	--
ENSG00000233593.10	0.24	0.22	0.2	0.19	0.18	0.19	LINC02609	chr1	lncRNA	long intergenic non-protein coding RNA 2609
ENSG00000105509.11	0.06	0	0.01	0	0	0	HAS1	chr19	protein_coding	hyaluronan synthase 1
ENSG00000186326.4	0.33	0.17	0.19	0.33	0.3	0.5	RGS9BP	chr19	protein_coding	regulator of G protein signaling 9 binding protein
ENSG00000259107.2	0	0	0.02	0.15	0.04	0.11	LINC00911	chr14	lncRNA	long intergenic non-protein coding RNA 911
ENSG00000085563.15	0	0	0.01	0.01	0	0.01	ABCB1	chr7	protein_coding	ATP binding cassette subfamily B member 1
ENSG00000133110.15	0.01	0.01	0	0	0	0	POSTN	chr13	protein_coding	periostin
ENSG00000138138.14	8.14	9.05	8.4	8.42	9.01	7.77	ATAD1	chr10	protein_coding	ATPase family AAA domain containing 1
ENSG00000261934.3	0	0.01	0.01	0.01	0	0.01	PCDHGA9	chr5	protein_coding	protocadherin gamma subfamily A, 9
ENSG00000035664.11	0.4	0.39	0.44	0.19	0.19	0.18	DAPK2	chr15	protein_coding	death associated protein kinase 2
ENSG00000286342.1	0.03	0	0	0	0.03	0.02	RP11-460N20.8	chr7	lncRNA	--
ENSG00000275963.1	0.04	0.04	0	0.08	0.08	0.13	RP11-180M15.6	chr12	lncRNA	--
ENSG00000105971.15	34.54	35.23	33.03	26.08	26.16	25.29	CAV2	chr7	protein_coding	caveolin 2
ENSG00000275880.1	0.03	0.07	0.06	0.04	0.04	0.05	RP11-90L1.8	chr13	lncRNA	--
ENSG00000260179.1	0.06	0.06	0.09	0.02	0.14	0	RP5-902P8.12	chr1	lncRNA	--
ENSG00000212802.4	2.62	2.38	2.72	2.74	2.62	2.75	RPL15P3	chr6	processed_pseudogene	ribosomal protein L15 pseudogene 3
ENSG00000267364.2	0	0.02	0	0.02	0.02	0	RP11-47L3.1	chr17	lncRNA	--
ENSG00000255970.1	0	0	0	0	0.01	0	LINC02421	chr12	lncRNA	long intergenic non-protein coding RNA 2421
ENSG00000214646.8	0	0	0	0	0	0.04	COMMD4P1	chr15	transcribed_unprocessed_pseudogene	COMM domain containing 4 pseudogene 1
ENSG00000125726.11	0.04	0.06	0.02	0	0.02	0	CD70	chr19	protein_coding	CD70 molecule
ENSG00000125731.13	4.1	4.32	4.48	12.17	11.78	12.38	SH2D3A	chr19	protein_coding	SH2 domain containing 3A
ENSG00000189337.17	0.91	1.06	1.06	0.63	0.54	0.65	KAZN	chr1	protein_coding	kazrin, periplakin interacting protein
ENSG00000154710.18	0.7	0.58	0.64	0.68	0.64	0.55	RABGEF1	chr7	protein_coding	RAB guanine nucleotide exchange factor 1
ENSG00000057294.16	2.35	2.21	2.16	4.74	4.6	4.91	PKP2	chr12	protein_coding	plakophilin 2
ENSG00000282849.1	0	0.05	0.05	0.2	0	0	RP11-121P12.1	chr1	lncRNA	--
ENSG00000172992.12	3.52	3.87	3.99	3.86	3.79	3.53	DCAKD	chr17	protein_coding	dephospho-CoA kinase domain containing
ENSG00000099999.15	0.93	1.02	0.97	0.9	0.78	0.74	RNF215	chr22	protein_coding	ring finger protein 215
ENSG00000003249.15	2.35	2.02	2.29	2.01	2.16	2.3	DBNDD1	chr16	protein_coding	dysbindin domain containing 1
ENSG00000158457.6	0.55	0.56	0.52	0.9	0.85	0.78	TSPAN33	chr7	protein_coding	tetraspanin 33
ENSG00000167733.14	1.12	1.08	1.07	0.86	0.73	0.96	HSD11B1L	chr19	protein_coding	hydroxysteroid 11-beta dehydrogenase 1 like
ENSG00000203711.14	0.31	0.08	0.05	0.16	0.12	0.2	C6orf99	chr6	lncRNA	--
ENSG00000260916.8	3.62	3.82	4.04	3.88	3.54	3.55	CCPG1	chr15	protein_coding	cell cycle progression 1
ENSG00000184014.9	1.74	1.62	1.68	1.57	1.63	1.67	DENND5A	chr11	protein_coding	DENN domain containing 5A
ENSG00000164134.13	4.46	4.47	4.85	8.14	8.52	8.19	NAA15	chr4	protein_coding	N-alpha-acetyltransferase 15, NatA auxiliary subunit
ENSG00000168928.13	0	0.01	0.02	0.01	0	0	CTRB2	chr16	protein_coding	chymotrypsinogen B2
ENSG00000274765.1	0	0.07	0	0	0	0	RP11-139H15.7	chr15	lncRNA	--
ENSG00000234284.7	0.26	0.39	0.28	0.33	0.32	0.25	ZNF879	chr5	protein_coding	zinc finger protein 879
ENSG00000249352.4	0	0.02	0.05	0	0	0.03	LINC02198	chr5	lncRNA	long intergenic non-protein coding RNA 2198
ENSG00000173542.9	2.41	2.5	2.22	2.39	2.33	2.26	MOB1B	chr4	protein_coding	MOB kinase activator 1B
ENSG00000163492.15	0	0	0	0.01	0.01	0	CCDC141	chr2	protein_coding	coiled-coil domain containing 141
ENSG00000173409.14	9.98	10.73	10.54	8.03	7.7	7.98	ARV1	chr1	protein_coding	ARV1 homolog, fatty acid homeostasis modulator
ENSG00000115828.17	2.25	1.99	2.22	4.43	4.15	4.23	QPCT	chr2	protein_coding	glutaminyl-peptide cyclotransferase
ENSG00000100101.15	0.04	0.01	0.05	0.02	0.01	0.01	RP1-37E16.12	chr22	protein_coding	--
ENSG00000229386.3	0	0	0	0.01	0.01	0	OR8B9P	chr11	transcribed_unprocessed_pseudogene	olfactory receptor family 8 subfamily B member 9 pseudogene
ENSG00000253513.1	0	0	0	0	0.08	0	RP11-6D1.3	chr8	lncRNA	--
ENSG00000252759.1	0	0	0	0	0.33	0.35	Y_RNA	chr2	misc_RNA	--
ENSG00000104814.13	0.05	0.06	0.06	0.03	0.03	0.03	MAP4K1	chr19	protein_coding	mitogen-activated protein kinase kinase kinase kinase 1
ENSG00000253954.3	0.2	0	0.19	0.21	0	0.11	HMGN1P38	chr15	processed_pseudogene	high mobility group nucleosome binding domain 1 pseudogene 38
ENSG00000257303.2	0.95	1.02	0.92	0.88	0.91	0.81	RP11-977G19.11	chr12	lncRNA	--
ENSG00000013503.10	1.92	1.96	1.87	2.8	2.54	2.26	POLR3B	chr12	protein_coding	RNA polymerase III subunit B
ENSG00000220842.6	12.71	14.27	13.96	12.35	12.99	10.7	RPL21P16	chr10	processed_pseudogene	ribosomal protein L21 pseudogene 16
ENSG00000170264.13	0.61	0.84	0.76	0.82	0.72	0.79	FAM161A	chr2	protein_coding	FAM161 centrosomal protein A
ENSG00000242951.1	0.08	0	0	0.08	0.08	0.08	RP11-507E23.1	chr14	processed_pseudogene	--
ENSG00000170345.10	0.89	0.46	0.43	0.61	0.55	0.92	FOS	chr14	protein_coding	Fos proto-oncogene, AP-1 transcription factor subunit
ENSG00000243156.9	0.76	0.72	0.74	0.96	0.93	0.9	MICAL3	chr22	protein_coding	microtubule associated monooxygenase, calponin and LIM domain containing 3
ENSG00000287535.1	0.04	0	0.02	0.02	0	0	RP11-360L9.9	chr8	lncRNA	--
ENSG00000073614.13	1.15	1.13	1.11	1.2	1	1.14	KDM5A	chr12	protein_coding	lysine demethylase 5A
ENSG00000130827.6	3.06	3.05	3	2.87	2.55	2.86	PLXNA3	chrX	protein_coding	plexin A3
ENSG00000274717.1	0.04	0.02	0	0	0.04	0.04	RP1-47A17.1	chr22	processed_pseudogene	--
ENSG00000115758.13	38.53	38.73	38.42	69.16	71.39	72.92	ODC1	chr2	protein_coding	ornithine decarboxylase 1
ENSG00000287188.1	0.04	0	0.05	0.02	0.01	0	RP11-310I9.2	chr4	lncRNA	--
ENSG00000111879.20	0.01	0.02	0.01	0.04	0.02	0.04	FAM184A	chr6	protein_coding	family with sequence similarity 184 member A
ENSG00000137073.24	4.15	4.08	4.16	4.96	4.79	5.15	UBAP2	chr9	protein_coding	ubiquitin associated protein 2
ENSG00000152926.15	0.16	0.12	0.16	0.15	0.07	0.17	ZNF117	chr7	protein_coding	zinc finger protein 117
ENSG00000155329.12	4.83	4.47	4.46	4.89	5.24	4.54	ZCCHC10	chr5	protein_coding	zinc finger CCHC-type containing 10
ENSG00000160791.13	0.03	0.02	0.05	0	0.01	0	CCR5	chr3	protein_coding	C-C motif chemokine receptor 5
ENSG00000106524.9	4.25	4.77	4.98	4.12	4.26	3.9	ANKMY2	chr7	protein_coding	ankyrin repeat and MYND domain containing 2
ENSG00000164970.15	8.53	8.23	8.81	9.41	7.9	9.03	FAM219A	chr9	protein_coding	family with sequence similarity 219 member A
ENSG00000268521.1	0.07	0	0.13	0	0	0.07	VN1R83P	chr19	unprocessed_pseudogene	vomeronasal 1 receptor 83 pseudogene
ENSG00000152256.14	1.73	1.84	1.66	1.31	1.38	1.31	PDK1	chr2	protein_coding	pyruvate dehydrogenase kinase 1
ENSG00000272848.2	0.05	0.02	0.06	0.03	0.03	0.01	RP1-137D17.2	chr6	lncRNA	--
ENSG00000148481.14	6.56	7.08	6.53	6.36	6	6.24	MINDY3	chr10	protein_coding	MINDY lysine 48 deubiquitinase 3
ENSG00000143353.12	5.63	6.98	6.33	5.05	4.79	4.53	LYPLAL1	chr1	protein_coding	lysophospholipase like 1
ENSG00000178385.15	0.3	0.26	0.26	0.16	0.18	0.18	PLEKHM3	chr2	protein_coding	pleckstrin homology domain containing M3
ENSG00000264701.1	0.47	0.44	0.27	0.37	0.24	0.19	RP11-6N17.10	chr17	lncRNA	--
ENSG00000215630.6	0.05	0.2	0.15	0.11	0	0	GUSBP9	chr5	unprocessed_pseudogene	GUSB pseudogene 9
ENSG00000200170.1	0.92	0.29	0.29	0.32	0.31	0	Y_RNA	chr10	misc_RNA	--
ENSG00000148343.19	3.89	3.57	3.64	4.4	4.11	4.37	MIGA2	chr9	protein_coding	mitoguardin 2
ENSG00000227496.3	0.13	0.22	0.24	0.16	0.24	0.2	RP11-145A3.1	chr1	lncRNA	--
ENSG00000205302.7	6.02	6.25	6.39	5.71	5.84	5.82	SNX2	chr5	protein_coding	sorting nexin 2
ENSG00000147955.18	53.97	55.09	58.98	68.03	68.83	71.35	SIGMAR1	chr9	protein_coding	sigma non-opioid intracellular receptor 1
ENSG00000115325.14	5.71	5.93	6.1	6.7	6.76	6.84	DOK1	chr2	protein_coding	docking protein 1
ENSG00000137225.13	0.34	0.21	0.4	0.14	0.13	0.18	CAPN11	chr6	protein_coding	calpain 11
ENSG00000232901.1	0	0	0.1	0	0.11	0	CYCSP10	chr3	processed_pseudogene	CYCS pseudogene 10
ENSG00000168924.15	7.43	7.16	7.07	9.44	9.54	9.55	LETM1	chr4	protein_coding	leucine zipper and EF-hand containing transmembrane protein 1
ENSG00000203852.3	0	0.02	0	0.02	0	0.02	H3C15	chr1	protein_coding	H3 clustered histone 15
ENSG00000283429.1	8.75	12.08	9.15	9.54	8.16	8.96	MIR1244-3	chr12	miRNA	microRNA 1244-3
ENSG00000188747.9	3.25	3.78	3.76	2.47	2.27	2.74	NOXA1	chr9	protein_coding	NADPH oxidase activator 1
ENSG00000183066.14	0.05	0.07	0.06	0.06	0.05	0.05	WBP2NL	chr22	protein_coding	WBP2 N-terminal like
ENSG00000238117.1	0	0	0	0.13	0	0	AP004372.1	chr11	lncRNA	--
ENSG00000157456.8	24.16	24.94	24.83	25.61	27.93	28.17	CCNB2	chr15	protein_coding	cyclin B2
ENSG00000280649.2	2.43	2.94	2.48	3.95	3.76	3.26	CH17-172B3.1	chr1	TEC	--
ENSG00000147255.19	0	0	0	0.01	0.01	0	IGSF1	chrX	protein_coding	immunoglobulin superfamily member 1
ENSG00000141504.12	42.35	40.01	37.67	35.48	36.43	36.05	SAT2	chr17	protein_coding	spermidine/spermine N1-acetyltransferase family member 2
ENSG00000058085.15	8.03	7.8	8.07	35.62	37.98	37.4	LAMC2	chr1	protein_coding	laminin subunit gamma 2
ENSG00000262979.1	0	0	0	0.05	0	0.05	CTD-2047H16.2	chr17	lncRNA	--
ENSG00000116478.12	24.22	23.29	24.42	30.55	31.28	31.13	HDAC1	chr1	protein_coding	histone deacetylase 1
ENSG00000136827.12	17.39	17.7	18.72	17.6	18.4	18.49	TOR1A	chr9	protein_coding	torsin family 1 member A
ENSG00000278009.1	0	0	0	0	0.28	0	RP11-649E7.8	chr14	unprocessed_pseudogene	--
ENSG00000274225.1	0.05	0.05	0.09	0	0	0.05	KB-68A7.1	chr21	lncRNA	--
ENSG00000275120.3	0.17	0.03	0.11	0.07	0.07	0.06	RP11-182J1.18	chr15	lncRNA	--
ENSG00000272632.1	0	0	0.06	0	0	0	RP11-362F19.3	chr4	lncRNA	--
ENSG00000151929.10	36	35.33	36.39	36.13	37.61	39.52	BAG3	chr10	protein_coding	BAG cochaperone 3
ENSG00000242436.3	0	0	0	0.11	0	0	RN7SL789P	chr19	misc_RNA	RNA, 7SL, cytoplasmic 789, pseudogene
ENSG00000008710.20	1.23	1.1	1.17	0.98	0.9	0.93	PKD1	chr16	protein_coding	polycystin 1, transient receptor potential channel interacting
ENSG00000107854.6	6.01	6.06	5.73	5.89	5.54	5.42	TNKS2	chr10	protein_coding	tankyrase 2
ENSG00000272396.1	0.07	0	0.06	0	0.14	0	CTC-490G23.4	chr19	lncRNA	--
ENSG00000144028.15	13.5	14	14.66	14.35	14.05	14.21	SNRNP200	chr2	protein_coding	small nuclear ribonucleoprotein U5 subunit 200
ENSG00000164944.12	4.65	4.91	4.8	4.45	4.74	4.38	VIRMA	chr8	protein_coding	vir like m6A methyltransferase associated
ENSG00000163825.5	0.02	0.07	0	0.06	0	0.1	RTP3	chr3	protein_coding	receptor transporter protein 3
ENSG00000117114.20	0.2	0.2	0.25	0.17	0.2	0.18	ADGRL2	chr1	protein_coding	adhesion G protein-coupled receptor L2
ENSG00000287336.1	0	0.01	0.01	0	0	0.03	RP5-1116C7.2	chr1	lncRNA	--
ENSG00000060982.15	4.45	4.5	4.58	3.43	3.53	3.36	BCAT1	chr12	protein_coding	branched chain amino acid transaminase 1
ENSG00000130348.11	2.35	2.51	2.56	2.71	2.71	2.95	QRSL1	chr6	protein_coding	glutaminyl-tRNA amidotransferase subunit QRSL1
ENSG00000112081.17	39.14	40.24	38.26	37.21	39.25	37.82	SRSF3	chr6	protein_coding	serine and arginine rich splicing factor 3
ENSG00000255663.1	28.79	27.16	28.26	25.62	27.17	27.04	RP11-212D19.4	chr11	protein_coding	--
ENSG00000170190.16	1.42	1.54	1.35	2.29	2.17	2.23	SLC16A5	chr17	protein_coding	solute carrier family 16 member 5
ENSG00000174748.22	177.96	182.18	190.57	185.8	193.07	195.93	RPL15	chr3	protein_coding	ribosomal protein L15
ENSG00000166510.14	2.2	2.36	2.34	2.53	2.33	2.21	CCDC68	chr18	protein_coding	coiled-coil domain containing 68
ENSG00000114738.11	38.49	38.48	37.45	45.38	47.55	46.71	MAPKAPK3	chr3	protein_coding	MAPK activated protein kinase 3
ENSG00000201882.1	0.44	0	0	0.93	0	0	ENSG10010137281.1	chrX	snoRNA	--
ENSG00000164329.14	2.95	2.89	2.66	2.71	2.71	2.67	TENT2	chr5	protein_coding	terminal nucleotidyltransferase 2
ENSG00000158716.9	46.81	45.54	50.41	54.06	51.21	55.25	DUSP23	chr1	protein_coding	dual specificity phosphatase 23
ENSG00000282886.1	0.09	0.36	0	0	0.1	0.1	PTMAP12	chr9	processed_pseudogene	prothymosin alpha pseudogene 12
ENSG00000188051.7	0.29	0.23	0.43	0.2	0.14	0.27	TMEM221	chr19	protein_coding	transmembrane protein 221
ENSG00000267432.6	0.02	0.02	0.01	0.03	0.01	0.02	DNAH17-AS1	chr17	lncRNA	DNAH17 antisense RNA 1
ENSG00000123364.5	0.01	0	0.01	0	0.01	0	HOXC13	chr12	protein_coding	homeobox C13
ENSG00000198734.12	0.01	0	0	0	0.01	0.01	F5	chr1	protein_coding	coagulation factor V
ENSG00000176428.6	1.45	1.21	1.87	0.68	0.6	0.72	VPS37D	chr7	protein_coding	VPS37D subunit of ESCRT-I
ENSG00000200959.1	0	0.15	0	0.33	0	0.84	SNORA74A	chr5	snoRNA	small nucleolar RNA, H/ACA box 74A
ENSG00000274536.7	0.01	0	0.01	0.02	0	0.01	MIR223HG	chrX	lncRNA	MIR223 host gene
ENSG00000284602.1	0.07	0.03	0.11	0.07	0.04	0.03	RP3-465N24.7	chr1	lncRNA	--
ENSG00000230929.5	0	0	0	0.11	0	0.11	RP11-395C3.1	chr5	processed_pseudogene	--
ENSG00000272909.1	1.24	1.04	0.97	0.62	0.69	0.51	CTD-2555O16.4	chr14	lncRNA	--
ENSG00000080572.13	0.02	0	0	0	0	0	DNAAF6	chrX	protein_coding	dynein axonemal assembly factor 6
ENSG00000173120.15	8.02	7.78	8.1	9.23	8.81	8.96	KDM2A	chr11	protein_coding	lysine demethylase 2A
ENSG00000226479.4	9.32	9.23	9.18	8.63	8.64	8.73	TMEM185B	chr2	protein_coding	transmembrane protein 185B
ENSG00000106948.17	1.01	0.97	1.02	0.97	0.92	0.9	AKNA	chr9	protein_coding	AT-hook transcription factor
ENSG00000236393.2	0	0.06	0.05	0.06	0.06	0.09	RP11-320G24.1	chrX	lncRNA	--
ENSG00000198406.7	0.6	0.28	0.38	0.27	0.27	0.24	BZW1P2	chr3	processed_pseudogene	basic leucine zipper and W2 domains 1 pseudogene 2
ENSG00000196715.7	11.01	10.44	10.74	11.31	11.3	10.8	VKORC1L1	chr7	protein_coding	vitamin K epoxide reductase complex subunit 1 like 1
ENSG00000277501.1	0	0	0	0.03	0	0	RP11-697E22.2	chr17	lncRNA	--
ENSG00000173011.12	5.18	4.76	4.94	5.91	5.94	6.23	TADA2B	chr4	protein_coding	transcriptional adaptor 2B
ENSG00000272566.1	0.2	0.72	0.05	0.48	0.67	0.54	RP11-462G22.2	chr4	lncRNA	--
ENSG00000127533.4	0.77	0.81	0.83	0.18	0.33	0.26	F2RL3	chr19	protein_coding	F2R like thrombin or trypsin receptor 3
ENSG00000139146.14	2.89	3.06	2.82	3.34	3.71	3.16	SINHCAF	chr12	protein_coding	SIN3-HDAC complex associated factor
ENSG00000171777.16	0.02	0.02	0.01	0.01	0.04	0.03	RASGRP4	chr19	protein_coding	RAS guanyl releasing protein 4
ENSG00000232724.1	0	0.02	0	0.01	0	0	TRIM80P	chr17	unitary_pseudogene	tripartite motif containing 80, pseudogene
ENSG00000253414.3	10.32	11.15	12.89	8.08	7.78	6.25	LINC01605	chr8	lncRNA	long intergenic non-protein coding RNA 1605
ENSG00000241923.2	0.15	0	0.09	0.05	0.1	0	RPL14P3	chr4	processed_pseudogene	ribosomal protein L14 pseudogene 3
ENSG00000182050.13	0	0	0	0.01	0.02	0.02	MGAT4C	chr12	protein_coding	MGAT4 family member C
ENSG00000281357.3	0.03	0.01	0.01	0.02	0.01	0.03	ARRDC3-AS1	chr5	lncRNA	ARRDC3 antisense RNA 1
ENSG00000185838.14	1.51	1.79	1.78	2.01	1.96	2.22	GNB1L	chr22	protein_coding	G protein subunit beta 1 like
ENSG00000172775.17	12.5	13.08	13.3	13.37	13.62	14.37	PSME3IP1	chr16	protein_coding	proteasome activator subunit 3 interacting protein 1
ENSG00000247151.7	0.1	0.1	0.16	0.13	0.11	0.12	CSTF3-DT	chr11	lncRNA	CSTF3 divergent transcript
ENSG00000091039.17	6.12	6.12	5.74	5.21	4.94	4.52	OSBPL8	chr12	protein_coding	oxysterol binding protein like 8
ENSG00000101654.18	5.32	5.51	5.95	5.95	6.19	5.87	RNMT	chr18	protein_coding	RNA guanine-7 methyltransferase
ENSG00000084072.17	3.47	3.77	3.55	4.25	4.35	4.07	PPIE	chr1	protein_coding	peptidylprolyl isomerase E
ENSG00000112576.13	27.22	26.63	26.18	29.44	29.29	29.92	CCND3	chr6	protein_coding	cyclin D3
ENSG00000006327.14	103.9	115.37	124.18	143.04	148.33	154.67	TNFRSF12A	chr16	protein_coding	TNF receptor superfamily member 12A
ENSG00000227081.5	34.04	31.98	32.54	35.98	35.49	38.85	RP11-543P15.1	chr12	processed_pseudogene	--
ENSG00000281156.1	0	0.33	0	0	0	0	MIR3651	chr9	miRNA	microRNA 3651
ENSG00000266282.1	0.28	0.13	0	0	0	0	UBL5P2	chr17	processed_pseudogene	ubiquitin like 5 pseudogene 2
ENSG00000236301.5	0.02	0	0	0	0	0	MRGPRG-AS1	chr11	lncRNA	MRGPRG antisense RNA 1
ENSG00000176563.10	0.88	0.64	0.54	0.45	0.53	0.34	CNTD1	chr17	protein_coding	cyclin N-terminal domain containing 1
ENSG00000248115.1	0.01	0	0	0	0	0	RP11-752D24.2	chr4	lncRNA	--
ENSG00000261461.1	0	0.11	0.16	0.06	0	0	UBE2MP1	chr16	processed_pseudogene	ubiquitin conjugating enzyme E2 M pseudogene 1
ENSG00000160818.17	9.43	10.86	10.89	12.13	12.59	12.5	GPATCH4	chr1	protein_coding	G-patch domain containing 4
ENSG00000088387.20	5.73	5.91	5.97	8.26	8.21	8.16	DOCK9	chr13	protein_coding	dedicator of cytokinesis 9
ENSG00000214439.4	0.14	0.09	0.13	0.08	0.15	0.18	FAM185BP	chr7	transcribed_unprocessed_pseudogene	family with sequence similarity 185 member B, pseudogene
ENSG00000130731.16	20.22	19.41	20.92	19.38	20.21	19.81	METTL26	chr16	protein_coding	methyltransferase like 26
ENSG00000269696.2	0.29	0.33	0.35	0.21	0.29	0.34	ZNF470-DT	chr19	lncRNA	ZNF470 divergent transcript
ENSG00000090104.12	0	0.06	0.01	0.04	0.05	0.12	RGS1	chr1	protein_coding	regulator of G protein signaling 1
ENSG00000138587.6	0.57	0.56	0.63	0.79	0.5	0.62	MNS1	chr15	protein_coding	meiosis specific nuclear structural 1
ENSG00000106328.10	0.05	0	0.01	0.03	0.01	0.02	FSCN3	chr7	protein_coding	fascin actin-bundling protein 3
ENSG00000287042.1	0	0.04	0.04	0	0	0	RP11-255O19.2	chr3	lncRNA	--
ENSG00000165923.16	0.07	0.07	0.05	0.05	0.05	0.06	AGBL2	chr11	protein_coding	AGBL carboxypeptidase 2
ENSG00000253982.2	6.38	6.04	6.52	4.84	4.62	5.24	CTD-2336O2.1	chr8	lncRNA	--
ENSG00000268223.6	0.03	0.11	0	0.08	0.07	0.03	ARL14EPL	chr5	protein_coding	ADP ribosylation factor like GTPase 14 effector protein like
ENSG00000224011.1	0	0	0	0	0.1	0	AC111155.1	chr17	processed_pseudogene	--
ENSG00000173039.19	23.81	23.18	24.07	24.87	24.06	24.23	RELA	chr11	protein_coding	RELA proto-oncogene, NF-kB subunit
ENSG00000198822.11	0	0	0	0	0	0.01	GRM3	chr7	protein_coding	glutamate metabotropic receptor 3
ENSG00000103591.13	8.55	7.89	7.99	8.72	9.28	8.58	AAGAB	chr15	protein_coding	alpha and gamma adaptin binding protein
ENSG00000179241.13	4.67	4.76	5.47	5.06	5.27	5.14	LDLRAD3	chr11	protein_coding	low density lipoprotein receptor class A domain containing 3
ENSG00000197070.14	10.03	9.7	10.61	13.37	13.39	14.5	ARRDC1	chr9	protein_coding	arrestin domain containing 1
ENSG00000231563.2	0.26	0.42	0.12	0.2	0.13	0.41	RP11-245P10.4	chr1	lncRNA	--
ENSG00000116731.22	0.81	0.92	0.84	0.9	0.9	0.97	PRDM2	chr1	protein_coding	PR/SET domain 2
ENSG00000168137.19	3.68	3.96	3.86	4.04	3.83	3.87	SETD5	chr3	protein_coding	SET domain containing 5
ENSG00000165300.8	0.01	0	0	0.03	0.02	0.02	SLITRK5	chr13	protein_coding	SLIT and NTRK like family member 5
ENSG00000023041.12	4.59	4.74	4.52	4.77	4.94	4.81	ZDHHC6	chr10	protein_coding	zinc finger DHHC-type palmitoyltransferase 6
ENSG00000170561.13	0.09	0.07	0.03	0.1	0.03	0.01	IRX2	chr5	protein_coding	iroquois homeobox 2
ENSG00000270441.1	0.05	0.05	0.06	0.07	0.07	0.07	LAMB2P1	chr3	unprocessed_pseudogene	laminin subunit beta 2 pseudogene 1
ENSG00000169100.14_PAR_Y	1.68	3.61	2.95	1.94	1.83	1.51	SLC25A6	chrY	protein_coding	solute carrier family 25 member 6
ENSG00000258892.1	2.79	2.2	2.16	1.62	1.42	1.82	RP11-193F5.1	chr14	lncRNA	--
ENSG00000255160.5	0	0.05	0	0.05	0	0	RP11-428C19.5	chr11	lncRNA	--
ENSG00000143761.16	173.47	169.93	181.4	169.76	172.79	178.81	ARF1	chr1	protein_coding	ADP ribosylation factor 1
ENSG00000165233.18	27.22	28.62	28.67	24.27	23.83	25.01	CARD19	chr9	protein_coding	caspase recruitment domain family member 19
ENSG00000120211.4	0	0.03	0.01	0.03	0.05	0.05	INSL4	chr9	protein_coding	insulin like 4
ENSG00000121578.13	1.29	1.23	1.29	1.9	2.06	1.69	B4GALT4	chr3	protein_coding	beta-1,4-galactosyltransferase 4
ENSG00000225963.8	0	0	0	0	0.01	0	AC009950.2	chr2	lncRNA	--
ENSG00000142676.14	217.26	223.1	216.83	217.95	232.08	223.98	RPL11	chr1	protein_coding	ribosomal protein L11
ENSG00000158104.11	0.06	0.04	0.08	0.03	0.03	0.04	HPD	chr12	protein_coding	4-hydroxyphenylpyruvate dioxygenase
ENSG00000228305.2	3.55	3.72	3.08	3.52	3.81	3.44	PRELID1P6	chr2	processed_pseudogene	PRELID1 pseudogene 6
ENSG00000205702.11	0.05	0.05	0.01	0.04	0.01	0.06	CYP2D7	chr22	polymorphic_pseudogene	cytochrome P450 family 2 subfamily D member 7 (gene/pseudogene)
ENSG00000148218.16	5.64	5.75	6.07	5.16	4.43	4.76	ALAD	chr9	protein_coding	aminolevulinate dehydratase
ENSG00000179743.4	0.41	0.28	0.38	0.75	0.93	0.76	FLJ37453	chr1	lncRNA	--
ENSG00000268970.1	0	0.18	0	0	0	0.1	CTD-3099C6.11	chr19	lncRNA	--
ENSG00000233016.7	8.5	8.83	8.62	11.45	11.59	11.73	SNHG7	chr9	lncRNA	small nucleolar RNA host gene 7
ENSG00000120029.13	6.3	6.05	6.09	6.23	6.18	6.29	ARMH3	chr10	protein_coding	armadillo like helical domain containing 3
ENSG00000261150.3	0	0	0	0.03	0.02	0.01	EPPK1	chr8	protein_coding	epiplakin 1
ENSG00000188976.11	16.21	16.93	16.47	23.66	24.69	24.33	NOC2L	chr1	protein_coding	NOC2 like nucleolar associated transcriptional repressor
ENSG00000254526.1	0.06	0.06	0.06	0.26	0.26	0.13	RP11-466I1.1	chr11	lncRNA	--
ENSG00000241728.5	3.48	3.36	3.24	2.87	2.83	2.66	AP001062.8	chr21	lncRNA	--
ENSG00000082014.17	1.9	2.12	1.61	1.55	1.44	1.59	SMARCD3	chr7	protein_coding	SWI/SNF related, matrix associated, actin dependent regulator of chromatin, subfamily d, member 3
ENSG00000273820.2	1.21	1.18	1.48	1.51	1.83	1.47	USP27X	chrX	protein_coding	ubiquitin specific peptidase 27 X-linked
ENSG00000101443.18	0.23	0.13	0.17	1.14	1.32	1.74	WFDC2	chr20	protein_coding	WAP four-disulfide core domain 2
ENSG00000256720.1	0	0	0	0	0.06	0	BTG1P1	chr12	processed_pseudogene	BTG anti-proliferation factor 1 pseudogene 1
ENSG00000261268.1	0.03	0	0	0	0	0.03	RP11-308D13.3	chr4	lncRNA	--
ENSG00000122694.16	2.99	3.37	3.21	2.97	2.84	2.79	GLIPR2	chr9	protein_coding	GLI pathogenesis related 2
ENSG00000234160.1	8.79	8.32	8.27	9.42	9.28	12.15	RP11-613M10.6	chr9	lncRNA	--
ENSG00000233487.6	0	0.02	0	0	0	0	RPSAP69	chr3	transcribed_processed_pseudogene	ribosomal protein SA pseudogene 69
ENSG00000170296.10	142.59	138.07	142.53	135.92	139.22	140.23	GABARAP	chr17	protein_coding	GABA type A receptor-associated protein
ENSG00000277938.1	0.13	0.12	0.12	0.2	0.1	0.15	RP5-965G21.3	chr20	lncRNA	--
ENSG00000288548.1	0.02	0.19	0.04	0.04	0.04	0.07	RP11-428J1.6	chr6	lncRNA	--
ENSG00000226122.1	0	0	0.02	0	0	0	DDC-AS1	chr7	lncRNA	DDC antisense RNA 1
ENSG00000271937.1	0.15	0.14	0.09	0.32	0.05	0.22	RP11-424N24.2	chr3	lncRNA	--
ENSG00000130038.10	0.53	0.5	0.64	0.78	0.73	0.7	CRACR2A	chr12	protein_coding	calcium release activated channel regulator 2A
ENSG00000063176.16	3.98	4.32	4.44	4.46	4.25	4.22	SPHK2	chr19	protein_coding	sphingosine kinase 2
ENSG00000114626.18	2.88	2.94	3.09	2.44	2.46	2.63	ABTB1	chr3	protein_coding	ankyrin repeat and BTB domain containing 1
ENSG00000250208.6	0	0.01	0	0	0.01	0	FZD10-AS1	chr12	lncRNA	FZD10 antisense divergent transcript
ENSG00000182827.9	11.21	12.01	11.27	10.4	11.24	10.17	ACBD3	chr1	protein_coding	acyl-CoA binding domain containing 3
ENSG00000104213.13	1.27	1.1	1.21	1.81	1.67	1.7	PDGFRL	chr8	protein_coding	platelet derived growth factor receptor like
ENSG00000271914.1	0.16	0.22	0.07	0.33	0.08	0.08	RP4-789D17.5	chr1	lncRNA	--
ENSG00000166796.12	0	0	0	0.08	0	0.02	LDHC	chr11	protein_coding	lactate dehydrogenase C
ENSG00000197213.10	0	0	0	0	0.02	0	ZSCAN5B	chr19	protein_coding	zinc finger and SCAN domain containing 5B
ENSG00000245067.7	2.01	2.01	2.21	1.58	1.28	1.43	IGFBP7-AS1	chr4	lncRNA	IGFBP7 antisense RNA 1
ENSG00000100842.13	0	0	0	0.02	0.01	0	EFS	chr14	protein_coding	embryonal Fyn-associated substrate
ENSG00000145216.16	6.13	6.43	6.85	7.73	7.76	7.54	FIP1L1	chr4	protein_coding	factor interacting with PAPOLA and CPSF1
ENSG00000253075.1	0	0.24	0	0	0	0	RN7SKP92	chr14	misc_RNA	RN7SK pseudogene 92
ENSG00000226758.1	0	0	0	0.04	0	0	DISC1-IT1	chr1	lncRNA	DISC1 intronic transcript 1
ENSG00000111700.13	1.05	1.2	1.17	6.15	6.05	6.27	SLCO1B3	chr12	protein_coding	solute carrier organic anion transporter family member 1B3
ENSG00000186207.5	0	0.03	0	0.08	0.07	0	LCE5A	chr1	protein_coding	late cornified envelope 5A
ENSG00000224269.1	0	0	0	0.1	0	0	AP000697.6	chr21	lncRNA	--
ENSG00000185803.12	28.2	28.56	28.97	34.74	35.28	37.39	SLC52A2	chr8	protein_coding	solute carrier family 52 member 2
ENSG00000257252.6	0.12	0.41	0.4	0.15	0.24	0.18	RP11-486A14.2	chr12	lncRNA	--
ENSG00000268916.6	0.06	0.14	0.13	0.21	0.2	0.21	CSAG3	chrX	protein_coding	CSAG family member 3
ENSG00000057608.17	75.19	78.91	79.88	70.56	74.66	75.84	GDI2	chr10	protein_coding	GDP dissociation inhibitor 2
ENSG00000127527.14	5.78	5.82	6.11	6.98	6.82	6.63	EPS15L1	chr19	protein_coding	epidermal growth factor receptor pathway substrate 15 like 1
ENSG00000235088.1	0	0	0	0.1	0	0	RP4-620E11.4	chr20	processed_pseudogene	--
ENSG00000150593.18	4.4	5.35	5.06	5.75	5.47	5.62	PDCD4	chr10	protein_coding	programmed cell death 4
ENSG00000261916.1	0.06	0.11	0	0.06	0.06	0	RP11-235E17.4	chr17	lncRNA	--
ENSG00000012171.20	3.7	3.48	3.77	2.37	2.67	2.77	SEMA3B	chr3	protein_coding	semaphorin 3B
ENSG00000213793.5	1.21	1.35	1.5	1.52	1.3	1.6	ZNF888	chr19	protein_coding	zinc finger protein 888
ENSG00000119403.15	20.13	19.42	21.02	22.54	22.27	22.64	PHF19	chr9	protein_coding	PHD finger protein 19
ENSG00000230319.1	0	0.06	0.01	0.05	0.05	0.02	TTLL1-AS1	chr22	lncRNA	TTLL1 antisense RNA 1
ENSG00000272515.1	0	0	0	0	0	0.02	RP11-29P20.1	chr13	lncRNA	--
ENSG00000272149.1	4.17	3.56	2.27	2.23	1.14	1.52	RP11-627J17.1	chr3	lncRNA	--
ENSG00000256280.1	0.22	0	0	0	0	0	ATP5MGP1	chr11	processed_pseudogene	ATP synthase membrane subunit g pseudogene 1
ENSG00000234139.4	0	0.01	0	0.01	0	0	RP4-550H1.4	chr20	lncRNA	--
ENSG00000213963.6	0.06	0.06	0.04	0.05	0.05	0.05	AC074286.1	chr2	lncRNA	--
ENSG00000277453.1	0.11	0.1	0.1	0.06	0.05	0.11	CTC-492K19.7	chr19	lncRNA	--
ENSG00000136950.13	27.44	28.06	26.96	33.54	34.72	34.44	ARPC5L	chr9	protein_coding	actin related protein 2/3 complex subunit 5 like
ENSG00000172014.12	0.01	0	0	0	0.02	0.02	ANKRD20A4P	chr9	protein_coding	ankyrin repeat domain 20 family member A4, pseudogene
ENSG00000164190.19	1.88	1.94	2.07	2.12	1.95	2.03	NIPBL	chr5	protein_coding	NIPBL cohesin loading factor
ENSG00000272432.1	0.83	0.12	0.53	0.07	0.59	0.2	RP3-465N24.6	chr1	lncRNA	--
ENSG00000164885.13	18.33	18.16	19.07	17.89	17.84	17.75	CDK5	chr7	protein_coding	cyclin dependent kinase 5
ENSG00000204580.14	8.22	7.92	8.61	6.66	6.91	6.67	DDR1	chr6	protein_coding	discoidin domain receptor tyrosine kinase 1
ENSG00000032389.13	5.61	5.71	5.35	7.74	7.52	7.75	EIPR1	chr2	protein_coding	EARP complex and GARP complex interacting protein 1
ENSG00000117394.24	50.79	52	55.19	71.84	73.33	74.26	SLC2A1	chr1	protein_coding	solute carrier family 2 member 1
ENSG00000223109.1	0.51	0	0.47	0	0	0	MIR1538	chr16	miRNA	microRNA 1538
ENSG00000248429.5	0.04	0.03	0.04	0.03	0.03	0.02	FAM198B-AS1	chr4	lncRNA	--
ENSG00000227398.4	0.18	0.23	0.21	0.19	0.25	0.23	KIF9-AS1	chr3	lncRNA	KIF9 antisense RNA 1
ENSG00000136828.19	0.24	0.26	0.25	0.15	0.17	0.18	RALGPS1	chr9	protein_coding	Ral GEF with PH domain and SH3 binding motif 1
ENSG00000273373.1	0.37	0.3	0.23	0.25	0.06	0.16	RP5-1074L1.4	chr1	lncRNA	--
ENSG00000261113.1	0.22	0.08	0.2	0.14	0.04	0	RP11-141O15.1	chr16	lncRNA	--
ENSG00000143337.19	11.94	11.68	11.58	11.89	12.54	11.57	TOR1AIP1	chr1	protein_coding	torsin 1A interacting protein 1
ENSG00000166452.12	19.92	18.91	19.71	20.47	21.21	19.65	AKIP1	chr11	protein_coding	A-kinase interacting protein 1
ENSG00000165496.5	0	0	0	0.08	0.04	0	RPL10L	chr14	protein_coding	ribosomal protein L10 like
ENSG00000162896.6	0	0.02	0.01	0.01	0.06	0.02	PIGR	chr1	protein_coding	polymeric immunoglobulin receptor
ENSG00000204464.7	0.06	0	0.05	0	0	0	C1orf195	chr1	lncRNA	--
ENSG00000188185.13	0.08	0.11	0.07	0.08	0.1	0.14	LINC00265	chr7	lncRNA	long intergenic non-protein coding RNA 265
ENSG00000141428.17	8.75	9.71	8.58	9.45	9.62	10.17	C18orf21	chr18	protein_coding	chromosome 18 open reading frame 21
ENSG00000135976.20	0.05	0.05	0.08	0.09	0.04	0.06	ANKRD36	chr2	protein_coding	ankyrin repeat domain 36
ENSG00000177752.15	0	0.01	0	0.01	0	0	YIPF7	chr4	protein_coding	Yip1 domain family member 7
ENSG00000245532.9	8.93	10.19	8.36	6.06	3.8	4.69	NEAT1	chr11	lncRNA	nuclear paraspeckle assembly transcript 1
ENSG00000196449.4	20.48	19.98	20.47	27.28	26.62	27.91	YRDC	chr1	protein_coding	yrdC N6-threonylcarbamoyltransferase domain containing
ENSG00000228060.3	0.68	0.56	0.53	0.53	0.6	0.66	PABPC4-AS1	chr1	lncRNA	PABPC4 antisense RNA 1
ENSG00000112584.14	3.67	3.9	4.28	3.43	3.43	3.24	FAM120B	chr6	protein_coding	family with sequence similarity 120B
ENSG00000241721.1	0	0	0	0	0	0.22	SUMO1P1	chr20	processed_pseudogene	SUMO1 pseudogene 1
ENSG00000227449.8	0.01	0.03	0.02	0.02	0.08	0.03	FGF7P6	chr9	transcribed_unprocessed_pseudogene	fibroblast growth factor 7 pseudogene 6
ENSG00000100271.17	1.38	1.22	1.2	0.99	0.86	1.01	TTLL1	chr22	protein_coding	tubulin tyrosine ligase like 1
ENSG00000181991.16	7.73	7.48	7.16	8.17	7.91	8.24	MRPS11	chr15	protein_coding	mitochondrial ribosomal protein S11
ENSG00000180139.11	0.04	0.05	0.05	0.06	0.01	0.04	ACTA2-AS1	chr10	lncRNA	ACTA2 antisense RNA 1
ENSG00000228506.2	0.3	0.26	0.18	0.34	0.24	0.26	RP11-98I9.4	chr6	lncRNA	--
ENSG00000272592.1	0.06	0	0.06	0	0	0	RP11-63A2.2	chr10	lncRNA	--
ENSG00000108788.12	21.93	20.62	20.8	22.44	23.45	23.02	MLX	chr17	protein_coding	MAX dimerization protein MLX
ENSG00000286988.1	0	0	0.11	0	0.03	0.03	RP11-219D15.4	chr3	lncRNA	--
ENSG00000253796.2	0.03	0.01	0.01	0.03	0.05	0.14	RP11-1084E5.1	chr8	lncRNA	--
ENSG00000262655.4	0	0.02	0.01	0.02	0.01	0.02	SPON1	chr11	protein_coding	spondin 1
ENSG00000255642.1	0.02	0	0	0	0	0.04	PABPC1P4	chr12	processed_pseudogene	poly(A) binding protein cytoplasmic 1 pseudogene 4
ENSG00000118473.23	0	0	0	0.01	0.01	0	SGIP1	chr1	protein_coding	SH3GL interacting endocytic adaptor 1
ENSG00000245322.7	1.01	0.81	0.74	0.8	0.86	0.68	H2AZ1-DT	chr4	lncRNA	H2AZ1 divergent transcript
ENSG00000154237.13	1.02	0.97	0.91	0.8	0.76	0.82	LRRK1	chr15	protein_coding	leucine rich repeat kinase 1
ENSG00000179428.2	0.5	0.54	0.42	0.67	0.53	0.56	IL6-AS1	chr7	lncRNA	IL6 antisense RNA 1
ENSG00000180613.11	0	0.02	0.02	0.13	0.11	0.11	GSX2	chr4	protein_coding	GS homeobox 2
ENSG00000084090.14	33.82	33.97	33.54	32.36	32.79	31.24	STARD7	chr2	protein_coding	StAR related lipid transfer domain containing 7
ENSG00000176659.9	0	0	0	0.01	0	0	C20orf197	chr20	lncRNA	--
ENSG00000167112.10	8.15	8.08	8.32	8.34	8.28	8.2	TRUB2	chr9	protein_coding	TruB pseudouridine synthase family member 2
ENSG00000234670.1	0	0	0	0	0.04	0	OR6C64P	chr12	unprocessed_pseudogene	olfactory receptor family 6 subfamily C member 64 pseudogene
ENSG00000100084.14	7.92	7.2	7.59	7.97	8.11	8.06	HIRA	chr22	protein_coding	histone cell cycle regulator
ENSG00000288208.1	0.07	0.1	0.19	0.21	0.13	0.12	RP4-534D1.6	chr1	protein_coding	--
ENSG00000229132.2	0.94	1.25	0.57	0.72	1.09	0.65	EIF4A1P10	chrX	processed_pseudogene	eukaryotic translation initiation factor 4A1 pseudogene 10
ENSG00000109756.9	1.3	1.42	1.32	1.52	1.37	1.47	RAPGEF2	chr4	protein_coding	Rap guanine nucleotide exchange factor 2
ENSG00000081177.18	2.1	2.23	2.23	2.22	2.29	2.07	EXD2	chr14	protein_coding	exonuclease 3'-5' domain containing 2
ENSG00000285839.1	2.34	2.38	1.74	2.71	2.37	2.42	RP11-91A18.6	chr1	protein_coding	--
ENSG00000284716.1	0	0	0	0	0.09	0	CTA-215D11.5	chr1	lncRNA	--
ENSG00000236423.6	0.69	0.6	0.64	0.81	0.64	0.63	LINC01134	chr1	lncRNA	long intergenic non-protein coding RNA 1134
ENSG00000286998.1	0	0	0.02	0	0	0	RP11-1081L13.6	chr11	lncRNA	--
ENSG00000265678.1	0	0.11	0.16	0.23	0	0	RP11-1376P16.2	chr17	lncRNA	--
ENSG00000225224.1	0.07	0.06	0.06	0.14	0.07	0.14	RPS27AP12	chr7	processed_pseudogene	RPS27A pseudogene 12
ENSG00000150637.9	0.02	0.02	0.03	0.01	0.01	0.01	CD226	chr18	protein_coding	CD226 molecule
ENSG00000235013.1	0	0.25	0.16	0	0	0	COX20P2	chr2	processed_pseudogene	COX20 pseudogene 2
ENSG00000207501.1	1.51	0.72	0.7	2.17	1.35	0.4	RNVU1-14	chr1	snRNA	RNA, variant U1 small nuclear 14
ENSG00000165660.8	7.29	7.96	8.13	8.39	8.16	8.6	ABRAXAS2	chr10	protein_coding	abraxas 2, BRISC complex subunit
ENSG00000259820.1	0.23	0.27	0.25	0.23	0.2	0.33	AC083843.1	chr8	lncRNA	--
ENSG00000099139.14	0	0.01	0	0.01	0.01	0	PCSK5	chr9	protein_coding	proprotein convertase subtilisin/kexin type 5
ENSG00000278514.1	0.07	0	0	0	0.07	0	AC068831.16	chr15	lncRNA	--
ENSG00000067191.16	0.88	0.83	1	0.68	0.74	0.79	CACNB1	chr17	protein_coding	calcium voltage-gated channel auxiliary subunit beta 1
ENSG00000167759.13	0.04	0	0	0	0.01	0	KLK13	chr19	protein_coding	kallikrein related peptidase 13
ENSG00000113456.19	7.97	8.11	7.64	8.08	8.46	8.04	RAD1	chr5	protein_coding	RAD1 checkpoint DNA exonuclease
ENSG00000141425.18	4.61	4.89	4.72	4.46	4.52	4.02	RPRD1A	chr18	protein_coding	regulation of nuclear pre-mRNA domain containing 1A
ENSG00000255487.1	0	0.11	0	0.25	0.12	0	RP11-513D5.5	chr8	lncRNA	--
ENSG00000067900.8	2.68	3.02	2.86	2.92	2.84	2.85	ROCK1	chr18	protein_coding	Rho associated coiled-coil containing protein kinase 1
ENSG00000249565.2	0.03	0	0.02	0	0.05	0	SERBP1P5	chr4	processed_pseudogene	SERPINE1 mRNA binding protein 1 pseudogene 5
ENSG00000100600.15	15.55	15.54	15.65	19.52	20	19.79	LGMN	chr14	protein_coding	legumain
ENSG00000075290.8	0.01	0	0	0	0	0	WNT8B	chr10	protein_coding	Wnt family member 8B
ENSG00000219395.2	0	0	0	0.04	0	0	HSPA8P15	chr6	processed_pseudogene	heat shock protein family A (Hsp70) member 8 pseudogene 15
ENSG00000226928.1	0	0.07	0	0	0.23	0	RPS14P4	chr2	processed_pseudogene	ribosomal protein S14 pseudogene 4
ENSG00000147224.13	20.21	19.78	19.96	22.87	23.25	22.43	PRPS1	chrX	protein_coding	phosphoribosyl pyrophosphate synthetase 1
ENSG00000279227.1	0.89	1.11	1	1.34	1.47	1.55	AC009303.2	chr2	TEC	--
ENSG00000104047.15	0.75	0.68	0.69	0.74	0.83	0.68	DTWD1	chr15	protein_coding	DTW domain containing 1
ENSG00000215559.8	0.01	0	0	0	0.01	0	ANKRD20A11P	chr21	transcribed_unprocessed_pseudogene	ankyrin repeat domain 20 family member A11, pseudogene
ENSG00000231447.1	0	0	0.03	0	0	0	RP1-14D6.7	chrX	lncRNA	--
ENSG00000287601.1	0	0	0	0.05	0	0	RP11-11N7.6	chr1	lncRNA	--
ENSG00000276945.1	0.23	0.17	0.11	0	0	0	CTC-436P18.5	chr5	unprocessed_pseudogene	--
ENSG00000170786.13	0.59	0.66	0.61	3.32	3.74	3.68	SDR16C5	chr8	protein_coding	short chain dehydrogenase/reductase family 16C member 5
ENSG00000023909.10	11.05	10.58	9.3	9.84	10.95	11.14	GCLM	chr1	protein_coding	glutamate-cysteine ligase modifier subunit
ENSG00000162244.12	444.37	429.63	417.66	444.13	471.59	464.21	RPL29	chr3	protein_coding	ribosomal protein L29
ENSG00000119487.17	13.7	14.41	14.08	14.65	15.94	15.76	MAPKAP1	chr9	protein_coding	MAPK associated protein 1
ENSG00000115275.14	12.32	12.84	13.18	18.12	18.43	19.05	MOGS	chr2	protein_coding	mannosyl-oligosaccharide glucosidase
ENSG00000007341.19	2.89	2.57	2.69	2.75	2.82	2.52	ST7L	chr1	protein_coding	suppression of tumorigenicity 7 like
ENSG00000140285.12	0.01	0	0	0.03	0.03	0	FGF7	chr15	protein_coding	fibroblast growth factor 7
ENSG00000277534.1	1.79	1.54	1.62	1.69	1.71	1.46	RP11-9E17.1	chr18	lncRNA	--
ENSG00000212695.5	0	0	0	0.06	0.06	0.06	RP11-134K1.2	chr9	processed_pseudogene	--
ENSG00000241404.7	0.12	0.12	0.14	0.16	0.17	0.15	EGFL8	chr6	protein_coding	EGF like domain multiple 8
ENSG00000260992.1	0.08	0.15	0.14	0.24	0.63	0.37	DOCK9-DT	chr13	lncRNA	DOCK9 divergent transcript
ENSG00000162869.16	1.47	1.59	1.41	1.61	1.48	1.67	PPP1R21	chr2	protein_coding	protein phosphatase 1 regulatory subunit 21
ENSG00000287934.1	0.08	0.06	0.11	0.06	0.12	0.04	RP11-157K17.7	chr11	lncRNA	--
ENSG00000178297.14	0.09	0.09	0.12	0.07	0.09	0.18	TMPRSS9	chr19	protein_coding	transmembrane serine protease 9
ENSG00000276070.5	0.02	0	0.02	0	0.02	0.07	CCL4L2	chr17	protein_coding	C-C motif chemokine ligand 4 like 2
ENSG00000273186.1	0.45	1.15	0.85	0.55	1.16	0.97	RP11-339B21.10	chr9	lncRNA	--
ENSG00000182899.17	171.56	175.41	182.29	197.25	200.01	199.22	RPL35A	chr3	protein_coding	ribosomal protein L35a
ENSG00000229017.7	0.03	0.04	0	0.06	0	0.02	LINC01277	chr6	lncRNA	long intergenic non-protein coding RNA 1277
ENSG00000196420.7	11.39	12.46	11.61	7.11	5.51	7.4	S100A5	chr1	protein_coding	S100 calcium binding protein A5
ENSG00000100580.8	2.35	2.49	2.44	2.24	2.39	2.4	TMED8	chr14	protein_coding	transmembrane p24 trafficking protein family member 8
ENSG00000177640.16	0.03	0.02	0.02	0.03	0.03	0.03	CASC2	chr10	lncRNA	cancer susceptibility 2
ENSG00000165322.18	5.4	5.49	5.95	4.38	4.37	4.11	ARHGAP12	chr10	protein_coding	Rho GTPase activating protein 12
ENSG00000134248.14	67.33	71.36	71.79	58.68	59.35	61.84	LAMTOR5	chr1	protein_coding	late endosomal/lysosomal adaptor, MAPK and MTOR activator 5
ENSG00000132313.15	14.7	14.08	13.73	14.42	15.1	13.72	MRPL35	chr2	protein_coding	mitochondrial ribosomal protein L35
ENSG00000242575.1	0.22	0.37	0.36	0.33	0.44	0.44	TUBAP13	chr2	transcribed_processed_pseudogene	tubulin alpha pseudogene 13
ENSG00000267724.1	0.12	0.04	0.1	0.11	0.03	0.06	RP11-49K24.8	chr18	lncRNA	--
ENSG00000060749.16	2.57	2.69	2.91	2.51	2.44	2.39	QSER1	chr11	protein_coding	glutamine and serine rich 1
ENSG00000196782.12	0.02	0.06	0.06	0.11	0.12	0.13	MAML3	chr4	protein_coding	mastermind like transcriptional coactivator 3
ENSG00000150961.15	4.76	4.41	4.58	4.26	4.32	4.15	SEC24D	chr4	protein_coding	SEC24 homolog D, COPII coat complex component
ENSG00000161265.15	0.39	0.51	0.45	0.82	0.6	0.55	U2AF1L4	chr19	protein_coding	U2 small nuclear RNA auxiliary factor 1 like 4
ENSG00000163171.8	11.79	12.12	12.72	13.25	13.82	14.06	CDC42EP3	chr2	protein_coding	CDC42 effector protein 3
ENSG00000081985.13	0	0	0	0	0.01	0	IL12RB2	chr1	protein_coding	interleukin 12 receptor subunit beta 2
ENSG00000253276.4	3.81	3.73	3.6	3.71	3.86	3.64	CCDC71L	chr7	protein_coding	coiled-coil domain containing 71 like
ENSG00000174373.17	0.54	0.51	0.59	0.68	0.66	0.67	RALGAPA1	chr14	protein_coding	Ral GTPase activating protein catalytic subunit alpha 1
ENSG00000197575.6	0	0.07	0	0	0	0	RPS17P2	chr5	processed_pseudogene	ribosomal protein S17 pseudogene 2
ENSG00000151790.9	0.02	0.02	0.02	0	0.01	0.01	TDO2	chr4	protein_coding	tryptophan 2,3-dioxygenase
ENSG00000224097.5	0	0.02	0.02	0	0.1	0	RP11-472B18.1	chr4	transcribed_processed_pseudogene	--
ENSG00000260289.2	0	0	0	0	0.02	0.02	CTD-2535I10.1	chr16	lncRNA	--
ENSG00000073905.8	0.26	0.48	0.37	0.23	0.45	0.9	VDAC1P1	chrX	processed_pseudogene	voltage dependent anion channel 1 pseudogene 1
ENSG00000165983.15	4.49	4.24	4.54	4.14	4.07	4.09	PTER	chr10	protein_coding	phosphotriesterase related
ENSG00000248544.2	0	0.03	0	0.02	0	0.02	CTB-47B11.3	chr5	lncRNA	--
ENSG00000107371.14	3.64	3.95	4.01	4.72	4.77	4.66	EXOSC3	chr9	protein_coding	exosome component 3
ENSG00000118113.12	0	0	0.02	0	0.02	0	MMP8	chr11	protein_coding	matrix metallopeptidase 8
ENSG00000196557.13	0	0.01	0.01	0	0	0	CACNA1H	chr16	protein_coding	calcium voltage-gated channel subunit alpha1 H
ENSG00000102359.9	0.37	0.39	0.41	0.45	0.44	0.52	SRPX2	chrX	protein_coding	sushi repeat containing protein X-linked 2
ENSG00000242372.9	139.09	144.63	155.13	181.66	186.62	186.68	EIF6	chr20	protein_coding	eukaryotic translation initiation factor 6
ENSG00000285294.1	0.31	0.21	0.28	0.42	0.53	0.48	LINC00842	chr10	lncRNA	long intergenic non-protein coding RNA 842
ENSG00000246375.3	0.02	0.02	0.02	0.01	0	0.03	PPM1K-DT	chr4	lncRNA	PPM1K divergent transcript
ENSG00000145287.11	14.42	14.62	13.53	14.04	13.94	13.32	PLAC8	chr4	protein_coding	placenta associated 8
ENSG00000273055.1	0.1	0.28	0.37	0.26	0.2	0.21	CTB-13F3.1	chr7	lncRNA	--
ENSG00000105464.4	0.07	0.03	0.03	0.02	0.03	0.05	GRIN2D	chr19	protein_coding	glutamate ionotropic receptor NMDA type subunit 2D
ENSG00000230457.3	0.03	0.02	0.12	0.03	0.05	0.03	PA2G4P4	chr3	processed_pseudogene	proliferation-associated 2G4 pseudogene 4
ENSG00000247675.7	0	0.07	0.11	0.06	0.08	0.02	LRP4-AS1	chr11	lncRNA	LRP4 antisense RNA 1
ENSG00000099804.9	51.04	48.44	48.65	59.67	61.59	62.19	CDC34	chr19	protein_coding	cell division cycle 34, ubiqiutin conjugating enzyme
ENSG00000259883.2	0.03	0	0	0	0.03	0.03	EHD4-AS1	chr15	lncRNA	EHD4 antisense RNA 1
ENSG00000240859.3	0.2	0.3	0.22	0.25	0.32	0.37	AC093627.10	chr7	lncRNA	--
ENSG00000204231.11	17.09	17.57	16.62	15.74	15.74	15.9	RXRB	chr6	protein_coding	retinoid X receptor beta
ENSG00000177335.11	0.27	0.39	0.37	0.33	0.22	0.33	C8orf31	chr8	lncRNA	--
ENSG00000159263.16	0.27	0.25	0.33	0.23	0.22	0.23	SIM2	chr21	protein_coding	SIM bHLH transcription factor 2
ENSG00000167536.14	8.1	6.6	7.57	6.34	6.32	6.67	DHRS13	chr17	protein_coding	dehydrogenase/reductase 13
ENSG00000204175.5	0.55	0.4	0.38	0.33	0.38	0.32	GPRIN2	chr10	protein_coding	G protein regulated inducer of neurite outgrowth 2
ENSG00000168763.16	4.24	4.02	4.35	4.01	3.8	4.1	CNNM3	chr2	protein_coding	cyclin and CBS domain divalent metal cation transport mediator 3
ENSG00000273338.1	1.19	0.28	0.83	0.93	1.06	1.27	RP11-386I14.4	chr1	lncRNA	--
ENSG00000196683.11	66.29	70.05	70.64	66.1	64.69	62.02	TOMM7	chr7	protein_coding	translocase of outer mitochondrial membrane 7
ENSG00000148600.15	0	0	0	0.01	0	0	CDHR1	chr10	protein_coding	cadherin related family member 1
ENSG00000223797.6	0.68	0.65	0.59	0.54	0.56	0.51	ENTPD3-AS1	chr3	lncRNA	ENTPD3 antisense RNA 1
ENSG00000188585.9	0	0	0	0.01	0	0	CLEC20A	chr1	protein_coding	C-type lectin domain containing 20A
ENSG00000229531.6	0	0.03	0	0.1	0	0	RABGAP1L-AS1	chr1	lncRNA	RABGAP1L antisense RNA 1
ENSG00000270096.1	0.4	0.16	0.28	0.18	0.08	0.16	RP11-362K14.6	chr3	lncRNA	--
ENSG00000130023.16	5.16	5.46	5.08	5.09	5.33	4.71	ERMARD	chr6	protein_coding	ER membrane associated RNA degradation
ENSG00000261183.5	0.25	0.36	0.07	1.67	1.32	1.44	SPINT1-AS1	chr15	lncRNA	SPINT1 antisense RNA 1
ENSG00000145782.13	4.13	4.52	4.55	4.52	4.69	4.3	ATG12	chr5	protein_coding	autophagy related 12
ENSG00000197013.10	0.25	0.38	0.37	0.29	0.4	0.29	ZNF429	chr19	protein_coding	zinc finger protein 429
ENSG00000221533.1	2.19	2.67	2.91	1.64	0.64	1.67	MIR1184-1	chrX	miRNA	microRNA 1184-1
ENSG00000145945.7	2.26	2.57	2.59	2.6	1.85	2.94	FAM50B	chr6	protein_coding	family with sequence similarity 50 member B
ENSG00000111237.19	29.18	30.64	27.56	31.82	32.78	31.76	VPS29	chr12	protein_coding	VPS29 retromer complex component
ENSG00000091106.19	0.03	0.02	0	0.01	0.02	0	NLRC4	chr2	protein_coding	NLR family CARD domain containing 4
ENSG00000270248.1	0	0.14	0.07	0	0	0	CTC-471J1.10	chr19	processed_pseudogene	--
ENSG00000237510.7	0.1	0.05	0.1	0.04	0.08	0.09	GPAT2P1	chr2	transcribed_unprocessed_pseudogene	glycerol-3-phosphate acyltransferase 2 pseudogene 1
ENSG00000235989.4	0.18	0.08	0.06	0.07	0.09	0.13	MORC2-AS1	chr22	lncRNA	MORC2 antisense RNA 1
ENSG00000131096.10	0	0.02	0.02	0.03	0.05	0.06	PYY	chr17	protein_coding	peptide YY
ENSG00000145476.16	2.05	2.08	2.08	1.99	1.8	2.12	CYP4V2	chr4	protein_coding	cytochrome P450 family 4 subfamily V member 2
ENSG00000224328.1	0.38	0.4	0.2	0.4	0.26	0.49	MDC1-AS1	chr6	lncRNA	MDC1 antisense RNA 1
ENSG00000169760.17	0.02	0.01	0.02	0.08	0.11	0.06	NLGN1	chr3	protein_coding	neuroligin 1
ENSG00000233828.5	0.15	0.12	0.14	0.09	0.1	0.13	MIR4280HG	chr5	lncRNA	MIR4280 host gene
ENSG00000276573.1	0.42	0.13	0	0	0.14	0.3	RP11-128N14.5	chr13	lncRNA	--
ENSG00000231887.7	0.87	0.74	0.8	1.04	0.83	0.93	PRH1	chr12	protein_coding	proline rich protein HaeIII subfamily 1
ENSG00000152193.8	2.43	2.49	2.34	2.77	2.45	2.42	OBI1	chr13	protein_coding	ORC ubiquitin ligase 1
ENSG00000252711.1	0	0	0	0	0	0.1	RN7SKP116	chr6	misc_RNA	RN7SK pseudogene 116
ENSG00000177453.7	0.07	0.12	0.11	0.05	0.1	0.12	NIM1K	chr5	protein_coding	NIM1 serine/threonine protein kinase
ENSG00000272982.1	0	0	0	0	0	0.28	RP5-1180E21.4	chr1	lncRNA	--
ENSG00000224903.2	0.14	0.24	0.23	0.28	0.37	0.16	RNF32-AS1	chr7	lncRNA	RNF32 antisense RNA 1
ENSG00000163888.4	13.68	14.59	15.26	13.82	14.4	15.72	CAMK2N2	chr3	protein_coding	calcium/calmodulin dependent protein kinase II inhibitor 2
ENSG00000242525.1	0	0	0	0	0	0.03	OR7E100P	chr3	unprocessed_pseudogene	olfactory receptor family 7 subfamily E member 100 pseudogene
ENSG00000256189.1	0	0	0	0	0.04	0	RP11-167N4.5	chr11	processed_pseudogene	--
ENSG00000250251.6	0.12	0.17	0.09	0.14	0.13	0.13	PKD1P6	chr16	transcribed_unprocessed_pseudogene	polycystin 1, transient receptor potential channel interacting pseudogene 6
ENSG00000154309.9	0.76	0.77	0.93	0.91	0.78	0.94	DISP1	chr1	protein_coding	dispatched RND transporter family member 1
ENSG00000115963.14	17.05	17.07	18.6	21.05	20.73	20.19	RND3	chr2	protein_coding	Rho family GTPase 3
ENSG00000213904.9	0.36	0.36	0.42	0.56	0.41	0.45	LIPE-AS1	chr19	lncRNA	LIPE antisense RNA 1
ENSG00000235558.3	0	0	0.07	0	0.07	0	GUSBP17	chr5	unprocessed_pseudogene	GUSB pseudogene 17
ENSG00000214788.3	0	0	0.03	0	0	0	RP11-736I10.8	chr11	lncRNA	--
ENSG00000183850.14	0	0	0	0	0.02	0	ZNF730	chr19	protein_coding	zinc finger protein 730
ENSG00000235051.3	0	0.04	0	0	0	0	RP11-637O19.2	chr6	lncRNA	--
ENSG00000203446.2	0.02	0.05	0	0.04	0.05	0.07	SUGCT-AS1	chr7	lncRNA	SUGCT antisense RNA 1
ENSG00000242611.2	0.07	0.04	0	0	0	0	AC093627.8	chr7	lncRNA	--
ENSG00000145757.16	0.21	0.14	0.08	0.07	0.11	0.07	SPATA9	chr5	protein_coding	spermatogenesis associated 9
ENSG00000223573.7	0.01	0.02	0	0.01	0.01	0.01	TINCR	chr19	protein_coding	TINCR ubiquitin domain containing
ENSG00000129317.15	0.8	0.93	0.88	1.09	1.17	1.13	PUS7L	chr12	protein_coding	pseudouridine synthase 7 like
ENSG00000066135.13	2.86	3.42	2.97	3.65	3.61	3.69	KDM4A	chr1	protein_coding	lysine demethylase 4A
ENSG00000166343.10	0.26	0.39	0.52	0.32	0.23	0.27	MSS51	chr10	protein_coding	MSS51 mitochondrial translational activator
ENSG00000273112.1	0	0.05	0	0	0.06	0	RP11-25K21.6	chr1	lncRNA	--
ENSG00000251429.1	0	0	0.01	0	0	0	AIDAP2	chr4	transcribed_processed_pseudogene	AIDA pseudogene 2
ENSG00000211659.2	0	0	0	0	0.08	0	IGLV3-25	chr22	IG_V_gene	immunoglobulin lambda variable 3-25
ENSG00000149646.12	0.53	0.62	0.62	0.62	0.59	0.67	CNBD2	chr20	protein_coding	cyclic nucleotide binding domain containing 2
ENSG00000100297.16	10.89	10.51	11.12	10.28	11.04	11.81	MCM5	chr22	protein_coding	minichromosome maintenance complex component 5
ENSG00000266578.2	0	0.02	0.02	0	0	0	RP11-838N2.5	chr18	lncRNA	--
ENSG00000149187.18	7.28	7.48	6.92	7.54	7.17	7.01	CELF1	chr11	protein_coding	CUGBP Elav-like family member 1
ENSG00000124608.5	3.39	3.4	2.93	3.36	3.27	3.19	AARS2	chr6	protein_coding	alanyl-tRNA synthetase 2, mitochondrial
ENSG00000235459.5	0	0	0	0	0	0.1	RPS26P31	chr7	processed_pseudogene	ribosomal protein S26 pseudogene 31
ENSG00000271265.1	0	0.2	0	0	0	0	RP11-230C9.4	chr6	lncRNA	--
ENSG00000092871.17	2.19	2.15	2.06	2.55	2.69	2.49	RFFL	chr17	protein_coding	ring finger and FYVE like domain containing E3 ubiquitin protein ligase
ENSG00000117245.13	0.1	0.16	0.11	0.16	0.22	0.17	KIF17	chr1	protein_coding	kinesin family member 17
ENSG00000230596.3	0.02	0	0	0	0	0	GPAA1P2	chr2	transcribed_processed_pseudogene	glycosylphosphatidylinositol anchor attachment 1 pseudogene 2
ENSG00000218180.2	0	0.03	0	0	0	0	SLC25A5P7	chr6	processed_pseudogene	solute carrier family 25 member 5 pseudogene 7
ENSG00000101413.12	7.03	6.78	6.8	7.83	7.67	8.01	RPRD1B	chr20	protein_coding	regulation of nuclear pre-mRNA domain containing 1B
ENSG00000253187.2	0	0.04	0	0.02	0.04	0.02	HOXA10-AS	chr7	lncRNA	HOXA10 antisense RNA
ENSG00000259392.2	0.09	0.09	0	0	0	0	RP11-758N13.3	chr15	transcribed_processed_pseudogene	--
ENSG00000102387.16	0.01	0.04	0.01	0.01	0.02	0.01	TAF7L	chrX	protein_coding	TATA-box binding protein associated factor 7 like
ENSG00000207988.1	0	0	0	0	0.32	0	MIR576	chr4	miRNA	microRNA 576
ENSG00000090432.7	19.63	18.24	18.95	19.83	18.66	19.5	MUL1	chr1	protein_coding	mitochondrial E3 ubiquitin protein ligase 1
ENSG00000227372.12	0.69	0.65	0.64	1.1	0.99	1.1	TP73-AS1	chr1	transcribed_unitary_pseudogene	TP73 antisense RNA 1
ENSG00000169213.7	0.05	0.05	0.06	0.14	0.13	0.18	RAB3B	chr1	protein_coding	RAB3B, member RAS oncogene family
ENSG00000167642.13	47.73	46.74	45.64	70.52	73.69	73.37	SPINT2	chr19	protein_coding	serine peptidase inhibitor, Kunitz type 2
ENSG00000139218.18	2.31	2.47	2.41	2.83	2.74	2.55	SCAF11	chr12	protein_coding	SR-related CTD associated factor 11
ENSG00000166126.11	0.52	0.49	0.47	0.49	0.43	0.42	AMN	chr14	protein_coding	amnion associated transmembrane protein
ENSG00000151632.17	0.46	0.46	0.56	0.17	0.17	0.11	AKR1C2	chr10	protein_coding	aldo-keto reductase family 1 member C2
ENSG00000139433.11	20.35	19.92	18.54	27.1	28.36	29.02	GLTP	chr12	protein_coding	glycolipid transfer protein
ENSG00000110315.7	3.41	3.32	3.64	2.15	2.37	2.32	RNF141	chr11	protein_coding	ring finger protein 141
ENSG00000259709.1	0.08	0.06	0.02	0.04	0.06	0.04	CTD-2184D3.7	chr15	lncRNA	--
ENSG00000140464.20	5.43	5.68	5.7	5.78	5.91	6.23	PML	chr15	protein_coding	PML nuclear body scaffold
ENSG00000070814.22	7.35	7.51	7.93	9.49	9.9	9.77	TCOF1	chr5	protein_coding	treacle ribosome biogenesis factor 1
ENSG00000204983.14	0	0	0	0.1	0.24	0.12	PRSS1	chr7	protein_coding	serine protease 1
ENSG00000170846.17	3.01	2.93	2.52	3.55	3.42	3.52	AC093323.3	chr4	protein_coding	--
ENSG00000268543.1	2.44	2.25	2.33	1.9	2.36	2.81	CTD-2619J13.16	chr19	TEC	--
ENSG00000170667.15	0.04	0.02	0.04	0.03	0.03	0.02	RASA4B	chr7	protein_coding	RAS p21 protein activator 4B
ENSG00000268983.1	5.74	5.02	4.67	5.1	4.89	5.37	AC005253.4	chr19	lncRNA	--
ENSG00000143971.9	0.74	0.76	0.75	0.84	0.81	0.8	ETAA1	chr2	protein_coding	ETAA1 activator of ATR kinase
ENSG00000130396.21	3.37	3.63	3.54	3.48	3.51	3.21	AFDN	chr6	protein_coding	afadin, adherens junction formation factor
ENSG00000173275.13	0.48	0.62	0.78	0.56	0.63	0.53	ZNF449	chrX	protein_coding	zinc finger protein 449
ENSG00000088766.12	0.87	0.87	0.91	0.95	0.79	0.98	CRLS1	chr20	protein_coding	cardiolipin synthase 1
ENSG00000259321.1	0.37	0.94	0.81	0.78	0.46	0.4	RP11-468E2.5	chr14	lncRNA	--
ENSG00000259867.6	0.04	0.01	0.01	0.01	0.01	0.01	RP11-525K10.3	chr16	lncRNA	--
ENSG00000206552.4	0.03	0	0.01	0.02	0.04	0.03	KRBOX1-AS1	chr3	lncRNA	KRBOX1 antisense RNA 1
ENSG00000144645.15	3.53	3.43	3.72	4.11	4.08	4.14	OSBPL10	chr3	protein_coding	oxysterol binding protein like 10
ENSG00000130224.15	0.02	0	0.01	0.04	0.01	0.03	LRCH2	chrX	protein_coding	leucine rich repeats and calponin homology domain containing 2
ENSG00000130684.14	1.54	1.55	1.66	1.28	1.31	1.47	ZNF337	chr20	protein_coding	zinc finger protein 337
ENSG00000220924.4	0	0	0	0	0	0.07	OSTCP4	chr4	processed_pseudogene	oligosaccharyltransferase complex subunit pseudogene 4
ENSG00000168811.7	0.36	0.36	0.46	1.08	1.02	0.92	IL12A	chr3	protein_coding	interleukin 12A
ENSG00000171425.10	11.45	10.71	10.17	10.65	11.46	10.05	ZNF581	chr19	protein_coding	zinc finger protein 581
ENSG00000223584.1	0	0	0	0	0	0.05	TVP23CP1	chr7	processed_pseudogene	TVP23C pseudogene 1
ENSG00000124795.17	33.69	37.89	36.15	38.52	38.5	35.5	DEK	chr6	protein_coding	DEK proto-oncogene
ENSG00000213886.4	0	0.07	0.03	0.15	0.14	0.3	UBD	chr6	protein_coding	ubiquitin D
ENSG00000270670.1	0.02	0.02	0	0	0	0	MARK2P16	chr10	processed_pseudogene	microtubule affinity regulating kinase 2 pseudogene 16
ENSG00000136802.12	20.34	20.32	21.35	22.81	23.84	24.49	LRRC8A	chr9	protein_coding	leucine rich repeat containing 8 VRAC subunit A
ENSG00000258957.2	0	0.01	0.02	0	0.01	0	RP11-363J20.1	chr14	lncRNA	--
ENSG00000265784.1	20.94	16.72	15.35	10.95	9.75	9.3	RP1-56K13.3	chr17	lncRNA	--
ENSG00000223575.2	0	0.03	0.03	0	0	0	RBMX2P3	chr1	processed_pseudogene	RBMX2 pseudogene 3
ENSG00000155099.8	9.27	8.98	8.76	5.61	5.92	5.39	PIP4P2	chr8	protein_coding	phosphatidylinositol-4,5-bisphosphate 4-phosphatase 2
ENSG00000091181.20	0	0	0	0	0	0.02	IL5RA	chr3	protein_coding	interleukin 5 receptor subunit alpha
ENSG00000162813.18	15.28	13.65	11.94	13.15	12.88	12.7	BPNT1	chr1	protein_coding	3'(2'), 5'-bisphosphate nucleotidase 1
ENSG00000223872.2	0	0.02	0	0	0	0	AC006372.5	chr7	lncRNA	--
ENSG00000137628.18	0.6	0.81	0.74	0.76	0.8	0.69	DDX60	chr4	protein_coding	DExD/H-box helicase 60
ENSG00000143627.19	0.05	0.03	0.01	0.03	0	0.02	PKLR	chr1	protein_coding	pyruvate kinase L/R
ENSG00000198742.10	7.96	7.6	8.28	7.86	7.48	8.28	SMURF1	chr7	protein_coding	SMAD specific E3 ubiquitin protein ligase 1
ENSG00000213376.4	0.15	0	0	0	0.03	0	GAPDHP71	chr5	processed_pseudogene	glyceraldehyde-3-phosphate dehydrogenase pseudogene 71
ENSG00000260650.1	0	0	0	0	0	0.06	RP11-403P17.2	chr16	lncRNA	--
ENSG00000117450.15	245.57	243.29	225.79	235.14	242.8	235.29	PRDX1	chr1	protein_coding	peroxiredoxin 1
ENSG00000279928.2	0	0.05	0	0	0.06	0	DDX11L17	chr1	unprocessed_pseudogene	DEAD/H-box helicase 11 like 17 (pseudogene)
ENSG00000242078.1	0.2	0	0.09	0	0	0	RP11-738B7.1	chr7	lncRNA	--
ENSG00000267405.1	0	0.1	0.05	0.22	0.11	0.23	CTC-296K1.4	chr17	lncRNA	--
ENSG00000159023.22	0.66	0.67	0.71	0.6	0.63	0.5	EPB41	chr1	protein_coding	erythrocyte membrane protein band 4.1
ENSG00000235957.1	0.97	1.68	0.75	0.68	0.33	0.17	COX7CP1	chr13	processed_pseudogene	cytochrome c oxidase subunit 7C pseudogene 1
ENSG00000066230.12	0.02	0.02	0.02	0.03	0.02	0.02	SLC9A3	chr5	protein_coding	solute carrier family 9 member A3
ENSG00000270885.2	0.01	0.02	0.05	0.02	0	0.07	RASL10B	chr17	protein_coding	RAS like family 10 member B
ENSG00000153253.19	0.01	0	0	0.01	0.01	0.03	SCN3A	chr2	protein_coding	sodium voltage-gated channel alpha subunit 3
ENSG00000154447.15	4.58	4.36	4	5.58	5.69	5.92	SH3RF1	chr4	protein_coding	SH3 domain containing ring finger 1
ENSG00000252690.3	0.13	0.05	0.08	0.06	0.03	0.08	RP11-752G15.7	chr15	lncRNA	--
ENSG00000236137.1	0.06	0.05	0.06	0.08	0.11	0.1	RP11-27K13.3	chr1	lncRNA	--
ENSG00000213178.3	1.89	2.5	1.62	3.08	2.69	3.31	RPL22P1	chr3	processed_pseudogene	ribosomal protein L22 pseudogene 1
ENSG00000229855.9	0	0	0	0	0.01	0	CTC-546K23.1	chr5	lncRNA	--
ENSG00000252206.1	0	0.92	0	0.51	0	0	RNU7-40P	chr12	snRNA	RNA, U7 small nuclear 40 pseudogene
ENSG00000137054.16	13.56	12.56	13.67	17.23	16.63	18.34	POLR1E	chr9	protein_coding	RNA polymerase I subunit E
ENSG00000277182.1	0.1	0.06	0.1	0.2	0.09	0.19	CTB-58E17.5	chr17	lncRNA	--
ENSG00000111846.19	6.36	6.54	6.14	6.88	6.9	7.37	GCNT2	chr6	protein_coding	glucosaminyl (N-acetyl) transferase 2 (I blood group)
ENSG00000100307.13	0.93	1.03	0.9	0.86	0.87	0.86	CBX7	chr22	protein_coding	chromobox 7
ENSG00000185988.15	0.02	0.01	0.01	0.01	0.01	0.03	PLK5	chr19	protein_coding	polo like kinase 5 (inactive)
ENSG00000141738.14	0.72	0.97	0.89	1.2	1.24	1.25	GRB7	chr17	protein_coding	growth factor receptor bound protein 7
ENSG00000252965.1	1.17	0.83	1.09	0.31	0.89	1.56	Y_RNA	chr3	misc_RNA	--
ENSG00000177728.17	3.11	3.08	3.17	3.1	3.13	2.9	TMEM94	chr17	protein_coding	transmembrane protein 94
ENSG00000183690.13	0.03	0.03	0.02	0.03	0	0.03	EFHC2	chrX	protein_coding	EF-hand domain containing 2
ENSG00000270069.1	8.4	8.4	6.77	7.01	6.13	5.95	MIR222HG	chrX	lncRNA	miR222/221 cluster host gene
ENSG00000243613.1	0.26	0.12	0.12	0	0	0	RP11-216N14.8	chr1	lncRNA	--
ENSG00000108883.13	14.23	13.87	13.9	14.53	15.23	14.85	EFTUD2	chr17	protein_coding	elongation factor Tu GTP binding domain containing 2
ENSG00000143919.15	0.61	0.57	0.53	1.05	0.95	1.09	CAMKMT	chr2	protein_coding	calmodulin-lysine N-methyltransferase
ENSG00000171316.12	0.54	0.64	0.52	0.51	0.47	0.48	CHD7	chr8	protein_coding	chromodomain helicase DNA binding protein 7
ENSG00000265354.4	97.42	98.1	103.43	94.95	100.36	94.88	TIMM23	chr10	protein_coding	translocase of inner mitochondrial membrane 23
ENSG00000237798.1	0.07	0	0.06	0	0.07	0.14	AC010894.5	chr2	lncRNA	--
ENSG00000131019.11	1.07	1.08	1.42	1.92	2.01	2.14	ULBP3	chr6	protein_coding	UL16 binding protein 3
ENSG00000197457.10	20.95	21.41	20.73	8.38	8.31	8.68	STMN3	chr20	protein_coding	stathmin 3
ENSG00000288632.1	0.05	0.09	0.05	0.04	0.1	0.01	RP11-345J4.11	chr16	lncRNA	--
ENSG00000231665.1	0.02	0.04	0.02	0	0	0.06	OGFOD1P1	chr13	processed_pseudogene	2-oxoglutarate and iron dependent oxygenase domain containing 1 pseudogene 1
ENSG00000147231.14	0.54	0.82	0.73	0.74	0.57	0.53	RADX	chrX	protein_coding	RPA1 related single stranded DNA binding protein, X-linked
ENSG00000258609.3	0	0	0	0	0	0.01	LINC-ROR	chr18	lncRNA	long intergenic non-protein coding RNA, regulator of reprogramming
ENSG00000158482.10	0.03	0.03	0.06	0.06	0.03	0.03	SNX29P1	chr16	unprocessed_pseudogene	sorting nexin 29 pseudogene 1
ENSG00000146842.17	5.58	5.13	4.78	4.81	4.56	5.16	TMEM209	chr7	protein_coding	transmembrane protein 209
ENSG00000155974.13	0.07	0.04	0.02	0.08	0.09	0.1	GRIP1	chr12	protein_coding	glutamate receptor interacting protein 1
ENSG00000136810.13	535.53	534.5	529.72	491.24	517.54	504.15	TXN	chr9	protein_coding	thioredoxin
ENSG00000039560.14	5.89	6.59	6.73	8.42	8.54	8.1	RAI14	chr5	protein_coding	retinoic acid induced 14
ENSG00000115942.9	3.79	4.11	3.58	3.74	3.56	4.04	ORC2	chr2	protein_coding	origin recognition complex subunit 2
ENSG00000198700.10	9.07	8.69	9.16	9.48	9.27	9.41	IPO9	chr1	protein_coding	importin 9
ENSG00000177084.18	2.14	2.18	1.94	2.05	1.98	1.96	POLE	chr12	protein_coding	DNA polymerase epsilon, catalytic subunit
ENSG00000140694.17	2.04	1.91	2	1.93	1.91	1.89	PARN	chr16	protein_coding	poly(A)-specific ribonuclease
ENSG00000140943.17	7.64	7.43	7.4	7.09	7.28	7.88	MBTPS1	chr16	protein_coding	membrane bound transcription factor peptidase, site 1
ENSG00000129028.9	1.86	1.96	1.91	2.15	2	2.33	THAP10	chr15	protein_coding	THAP domain containing 10
ENSG00000247271.7	8.33	8.26	9.49	7.23	7.5	7.33	ZBED5-AS1	chr11	lncRNA	ZBED5 antisense RNA 1
ENSG00000205659.11	1.62	1.54	1.35	1.9	1.95	1.72	LIN52	chr14	protein_coding	lin-52 DREAM MuvB core complex component
ENSG00000186446.12	0.87	0.74	0.62	0.57	0.78	0.46	ZNF501	chr3	protein_coding	zinc finger protein 501
ENSG00000170871.12	2.35	2.59	2.73	2.51	2.29	2.29	KIAA0232	chr4	protein_coding	KIAA0232
ENSG00000143442.22	2.95	2.95	2.84	2.83	2.74	2.64	POGZ	chr1	protein_coding	pogo transposable element derived with ZNF domain
ENSG00000258245.1	0.82	0.58	0.76	1.07	1.67	1.53	RPL10P13	chr12	processed_pseudogene	ribosomal protein L10 pseudogene 13
ENSG00000249378.6	0	0	0	0.01	0.01	0	LINC01060	chr4	lncRNA	long intergenic non-protein coding RNA 1060
ENSG00000254721.1	7.14	6.96	5.87	6.06	4.74	4.52	RP11-805J14.5	chr11	lncRNA	--
ENSG00000269487.1	2.26	1.88	1.59	1.38	1.12	1.24	CTB-174O21.2	chr19	lncRNA	--
ENSG00000123009.4	0.37	0.28	0	0.08	0.23	0.08	NME2P1	chr12	processed_pseudogene	NME2 pseudogene 1
ENSG00000267583.5	0.27	0.48	0.35	0.25	0.07	0.43	RP11-322E11.5	chr18	lncRNA	--
ENSG00000149196.16	9.24	9.4	9.16	9.22	9.82	10.31	HIKESHI	chr11	protein_coding	heat shock protein nuclear import factor hikeshi
ENSG00000237596.7	0.18	0.16	0.16	0.3	0.3	0.26	RP13-143G15.4	chr6	lncRNA	--
ENSG00000174516.15	5.13	5.16	5.47	5.19	4.91	4.86	PELI3	chr11	protein_coding	pellino E3 ubiquitin protein ligase family member 3
ENSG00000164953.17	0.29	0.37	0.31	0.13	0.17	0.22	TMEM67	chr8	protein_coding	transmembrane protein 67
ENSG00000288093.1	0.02	0.02	0.09	0.02	0.08	0.02	RP11-122G18.13	chr1	lncRNA	--
ENSG00000144320.14	5.11	5.02	4.87	4.47	4.26	4.11	LNPK	chr2	protein_coding	lunapark, ER junction formation factor
ENSG00000078304.19	7.17	7.42	7.06	7.06	7.4	7.2	PPP2R5C	chr14	protein_coding	protein phosphatase 2 regulatory subunit B'gamma
ENSG00000071967.12	18.32	18.28	18.13	11.91	11.99	11.95	CYBRD1	chr2	protein_coding	cytochrome b reductase 1
ENSG00000226038.5	0.06	0	0	0	0.06	0	PPIAP21	chr20	processed_pseudogene	peptidylprolyl isomerase A pseudogene 21
ENSG00000187690.4	0	0	0	0	0.03	0	EZHIP	chrX	protein_coding	EZH inhibitory protein
ENSG00000274001.1	0.14	0	0	0	0	0.15	RP11-5G9.5	chr13	lncRNA	--
ENSG00000286138.1	0.09	0.16	0	0.3	0.18	0.12	CTD-3193O13.16	chr19	lncRNA	--
ENSG00000276075.1	0.46	0.5	0.42	0.48	0.5	0.38	CTD-2012K14.8	chr16	lncRNA	--
ENSG00000184068.2	0.12	0.18	0.05	0.08	0.08	0.06	SREBF2-AS1	chr22	lncRNA	SREBF2 antisense RNA 1
ENSG00000232872.2	0	0.01	0	0.01	0	0.04	CTAGE3P	chr13	processed_pseudogene	CTAGE family member 3, pseudogene
ENSG00000152454.4	0.48	0.57	0.65	0.93	0.67	0.87	ZNF256	chr19	protein_coding	zinc finger protein 256
ENSG00000166170.11	6.94	7.09	7.64	6.27	6.87	6.81	BAG5	chr14	protein_coding	BAG cochaperone 5
ENSG00000178974.11	5.13	5.19	5.59	5.7	6.03	5.79	FBXO34	chr14	protein_coding	F-box protein 34
ENSG00000116161.18	38.14	39.36	38.27	40.09	41.88	40.8	CACYBP	chr1	protein_coding	calcyclin binding protein
ENSG00000181444.13	1.01	0.66	0.94	0.8	0.72	0.91	ZNF467	chr7	protein_coding	zinc finger protein 467
ENSG00000187172.15	0	0	0	0.01	0.02	0.01	BAGE2	chr21	transcribed_unprocessed_pseudogene	BAGE family member 2, pseudogene
ENSG00000188707.6	16.63	14.58	15.37	14.52	14.32	15.27	ZBED6CL	chr7	protein_coding	ZBED6 C-terminal like
ENSG00000139908.15	0.02	0	0.01	0	0.02	0.05	TSSK4	chr14	protein_coding	testis specific serine kinase 4
ENSG00000147813.16	5.14	5.14	5.29	6.51	6.74	7.44	NAPRT	chr8	protein_coding	nicotinate phosphoribosyltransferase
ENSG00000278727.1	0.05	0.1	0.08	0.08	0.06	0.04	AC000403.4	chr13	lncRNA	--
ENSG00000134744.14	0.65	0.78	0.73	0.7	0.73	0.75	TUT4	chr1	protein_coding	terminal uridylyl transferase 4
ENSG00000156467.10	16.63	17.92	17.8	16.1	16.77	16.46	UQCRB	chr8	protein_coding	ubiquinol-cytochrome c reductase binding protein
ENSG00000136297.15	0.03	0	0	0	0.01	0	MMD2	chr7	protein_coding	monocyte to macrophage differentiation associated 2
ENSG00000011677.13	0.07	0.12	0.1	0.09	0.06	0.06	GABRA3	chrX	protein_coding	gamma-aminobutyric acid type A receptor subunit alpha3
ENSG00000100918.13	0.31	0.22	0.25	0.3	0.32	0.18	REC8	chr14	protein_coding	REC8 meiotic recombination protein
ENSG00000258317.1	0.12	0.09	0.29	0.25	0.12	0.1	RP11-603J24.5	chr12	lncRNA	--
ENSG00000272755.1	0.44	0.57	0.25	0.52	0.39	0.18	RP11-326G21.1	chr1	lncRNA	--
ENSG00000176125.7	2.4	2.3	3.16	2.77	3.39	3.83	UFSP1	chr7	protein_coding	UFM1 specific peptidase 1 (inactive)
ENSG00000205832.8	0	0	0	0.01	0	0	C16orf96	chr16	protein_coding	chromosome 16 open reading frame 96
ENSG00000165675.18	2.25	2.32	2.15	1.89	2.18	2.02	ENOX2	chrX	protein_coding	ecto-NOX disulfide-thiol exchanger 2
ENSG00000256661.1	0	0	0.06	0	0	0	A2ML1-AS1	chr12	lncRNA	A2ML1 antisense RNA 1
ENSG00000189077.11	19.08	18.67	19.32	14.48	14.52	15.84	TMEM120A	chr7	protein_coding	transmembrane protein 120A
ENSG00000255774.2	0	0	0.01	0	0	0	LINC02747	chr11	lncRNA	long intergenic non-protein coding RNA 2747
ENSG00000249493.1	0	0	0	0	0	0.07	ANKRD20A18P	chr21	unprocessed_pseudogene	ankyrin repeat domain 20 family member A18, pseudogene
ENSG00000010818.10	1.61	1.65	1.41	1.45	1.33	1.45	HIVEP2	chr6	protein_coding	HIVEP zinc finger 2
ENSG00000120942.14	5.59	5.78	6.18	6.69	6.64	6.45	UBIAD1	chr1	protein_coding	UbiA prenyltransferase domain containing 1
ENSG00000170703.16	0.01	0	0.03	0.02	0.02	0.05	TTLL6	chr17	protein_coding	tubulin tyrosine ligase like 6
ENSG00000156345.18	0.61	0.54	0.71	0.55	0.57	0.56	CDK20	chr9	protein_coding	cyclin dependent kinase 20
ENSG00000186019.11	0.18	0.15	0.11	0.23	0.16	0.18	AC084219.4	chr19	lncRNA	--
ENSG00000103522.16	0.01	0.01	0	0.01	0.02	0	IL21R	chr16	protein_coding	interleukin 21 receptor
ENSG00000232454.2	0.09	0.08	0.16	0.18	0	0.09	RP11-3J10.7	chr9	processed_pseudogene	--
ENSG00000049541.11	36.73	36.75	37.31	43.52	44.56	43.55	RFC2	chr7	protein_coding	replication factor C subunit 2
ENSG00000257390.5	3.78	3.26	3.46	3.86	3.73	3.5	RP11-762I7.5	chr12	protein_coding	--
ENSG00000120860.11	11.4	11.26	11.71	12.01	13	12.01	WASHC3	chr12	protein_coding	WASH complex subunit 3
ENSG00000175287.19	10.53	10.46	11.71	10.31	9.69	10.43	PHYHD1	chr9	protein_coding	phytanoyl-CoA dioxygenase domain containing 1
ENSG00000263218.2	1.7	1.03	1.27	1.71	0.69	0.95	CTD-2561B21.7	chr17	lncRNA	--
ENSG00000135297.17	2.09	1.93	2.14	2.16	2.15	2.06	MTO1	chr6	protein_coding	mitochondrial tRNA translation optimization 1
ENSG00000204099.12	0	0.01	0.01	0	0.01	0.01	NEU4	chr2	protein_coding	neuraminidase 4
ENSG00000236499.2	0.07	0.03	0.04	0.06	0.06	0.05	LINC00896	chr22	lncRNA	long intergenic non-protein coding RNA 896
ENSG00000177410.13	11.84	11.51	11.13	16.24	17.02	16.26	ZFAS1	chr20	lncRNA	ZNFX1 antisense RNA 1
ENSG00000280710.3	0	0	0	0	0	0.06	RP11-214F16.8	chr13	lncRNA	--
ENSG00000279716.1	0.78	0.6	0.45	0.82	0.91	0.48	AC006128.2	chr19	TEC	--
ENSG00000151468.11	6.42	6.36	6.31	2.24	2.38	2.19	CCDC3	chr10	protein_coding	coiled-coil domain containing 3
ENSG00000196369.11	0.3	0.36	0.35	0.34	0.36	0.34	SRGAP2B	chr1	protein_coding	SLIT-ROBO Rho GTPase activating protein 2B
ENSG00000124772.12	0.24	0.33	0.24	0.29	0.22	0.31	CPNE5	chr6	protein_coding	copine 5
ENSG00000133624.13	0.8	0.8	0.83	0.72	0.46	0.58	ZNF767P	chr7	transcribed_unprocessed_pseudogene	zinc finger family member 767, pseudogene
ENSG00000282995.1	0	0.04	0.07	0.04	0	0.04	FRG1EP	chr20	unprocessed_pseudogene	FSHD region gene 1 family member E, pseudogene
ENSG00000277968.1	0	0	0	0	0.35	0	ENSG10010138144.1	chr5	misc_RNA	--
ENSG00000178125.14	5.41	5.59	4.79	5.29	5.69	5.37	PPP1R42	chr8	protein_coding	protein phosphatase 1 regulatory subunit 42
ENSG00000240914.1	0.6	0.29	0.47	0.11	0.51	0.16	RPL15P2	chr14	processed_pseudogene	ribosomal protein L15 pseudogene 2
ENSG00000245864.3	0	0	0	0.02	0	0.01	MEF2C-AS2	chr5	lncRNA	MEF2C antisense RNA 2
ENSG00000235843.1	0	0	0.06	0	0	0	RP13-16H11.5	chr10	lncRNA	--
ENSG00000103769.10	17.23	17.69	18.65	20.18	21.79	20.08	RAB11A	chr15	protein_coding	RAB11A, member RAS oncogene family
ENSG00000234068.7	0	0	0	1	1.79	1.22	PAGE2	chrX	protein_coding	PAGE family member 2
ENSG00000231808.2	0	0	0.14	0	0	0	LINC01388	chr9	lncRNA	long intergenic non-protein coding RNA 1388
ENSG00000260792.1	0	0.01	0.02	0.03	0.02	0.02	LINC02280	chr14	lncRNA	long intergenic non-protein coding RNA 2280
ENSG00000170089.15	5.26	5.56	4.96	4.52	4.99	4.76	RP11-423H2.1	chr5	transcribed_unprocessed_pseudogene	--
ENSG00000267699.2	0.95	1.1	0.91	1.12	1.06	1.42	RP11-729L2.2	chr18	protein_coding	--
ENSG00000245975.2	0.4	0.57	0.58	0.33	0.47	0.33	RP11-30K9.6	chr15	lncRNA	--
ENSG00000260646.1	0	0.04	0.04	0	0.05	0	LA16c-385E7.1	chr16	lncRNA	--
ENSG00000029639.11	1.12	1.47	1.58	1.33	1.63	1.75	TFB1M	chr6	protein_coding	transcription factor B1, mitochondrial
ENSG00000115539.14	26.28	26.61	25.15	22.75	23.1	21.19	PDCL3	chr2	protein_coding	phosducin like 3
ENSG00000159792.10	7.49	7.24	7.64	5.55	5.68	5.36	PSKH1	chr16	protein_coding	protein serine kinase H1
ENSG00000227066.2	0.02	0.06	0.03	0.25	0.26	0.25	RP3-340N1.2	chr1	lncRNA	--
ENSG00000276593.1	0.06	0	0.05	0.06	0	0	RP11-295H24.5	chr15	lncRNA	--
ENSG00000232891.1	0.08	0	0	0	0	0	RP11-136K14.1	chr6	lncRNA	--
ENSG00000171160.18	6.37	5.64	6.14	6.35	7.19	6.9	MORN4	chr10	protein_coding	MORN repeat containing 4
ENSG00000203761.5	1.05	0.84	0.67	0.95	0.76	0.87	MSTO2P	chr1	unprocessed_pseudogene	misato family member 2, pseudogene
ENSG00000064651.14	2.23	2.15	1.81	1.94	1.96	1.59	SLC12A2	chr5	protein_coding	solute carrier family 12 member 2
ENSG00000242125.3	14.76	14.45	13.48	20.31	19.33	19.73	SNHG3	chr1	lncRNA	small nucleolar RNA host gene 3
ENSG00000065361.17	0.17	0.19	0.19	0.42	0.5	0.39	ERBB3	chr12	protein_coding	erb-b2 receptor tyrosine kinase 3
ENSG00000211772.11	2.82	3.21	3.57	7.53	7.57	8.96	TRBC2	chr7	TR_C_gene	T cell receptor beta constant 2
ENSG00000215388.3	0.14	0	0.03	0.06	0	0.06	ACTG1P3	chr20	processed_pseudogene	actin gamma 1 pseudogene 3
ENSG00000175311.7	0.01	0	0	0	0	0	ANKS4B	chr16	protein_coding	ankyrin repeat and sterile alpha motif domain containing 4B
ENSG00000250456.1	0	0	0	0	0.03	0	LINC02260	chr4	lncRNA	long intergenic non-protein coding RNA 2260
ENSG00000078747.16	20.62	20.3	21.34	20.08	21.26	21.9	ITCH	chr20	protein_coding	itchy E3 ubiquitin protein ligase
ENSG00000266777.1	0.15	0.17	0.23	0.08	0.08	0.09	SH3GL1P1	chr17	transcribed_processed_pseudogene	SH3 domain containing GRB2 like 1, endophilin A2 pseudogene 1
ENSG00000159197.4	0.03	0.06	0.03	0.03	0	0	KCNE2	chr21	protein_coding	potassium voltage-gated channel subfamily E regulatory subunit 2
ENSG00000172724.12	0	0.04	0	0	0	0	CCL19	chr9	protein_coding	C-C motif chemokine ligand 19
ENSG00000140600.17	0	0	0	0	0.01	0	SH3GL3	chr15	protein_coding	SH3 domain containing GRB2 like 3, endophilin A3
ENSG00000184602.6	3.74	3.63	4.02	3.95	4.03	4.15	SNN	chr16	protein_coding	stannin
ENSG00000167676.4	0.02	0	0.02	0.01	0.01	0.02	PLIN4	chr19	protein_coding	perilipin 4
ENSG00000239482.6	0	0	0.07	0	0	0	RP11-90K6.1	chr3	lncRNA	--
ENSG00000164916.11	3.77	3.66	3.66	3.42	3.47	3.16	FOXK1	chr7	protein_coding	forkhead box K1
ENSG00000167967.16	2.4	2.4	2.58	3.19	2.65	3.05	E4F1	chr16	protein_coding	E4F transcription factor 1
ENSG00000143387.14	0.3	0.29	0.24	0.2	0.2	0.22	CTSK	chr1	protein_coding	cathepsin K
ENSG00000159335.18	86.78	83.62	95.06	81.57	80.51	90.95	PTMS	chr12	protein_coding	parathymosin
ENSG00000253286.6	0.02	0.02	0	0	0	0.02	CTD-2552K11.2	chr8	lncRNA	--
ENSG00000268266.1	0.09	0	0.04	0.15	0.05	0	AC003005.2	chr19	lncRNA	--
ENSG00000266088.6	0.3	0.15	0.3	0.34	0.45	0.3	RP5-1028K7.2	chr17	lncRNA	--
ENSG00000138400.13	0.14	0.04	0.1	0.09	0.09	0.16	MDH1B	chr2	protein_coding	malate dehydrogenase 1B
ENSG00000270781.1	0	0	0.1	0.11	0	0.11	RP11-501C14.9	chr17	processed_pseudogene	--
ENSG00000146587.18	0.96	1.03	1.13	1.15	1.06	0.97	RBAK	chr7	protein_coding	RB associated KRAB zinc finger
ENSG00000067601.8	2.17	1.63	2.32	2.19	1.57	1.73	PMS2P4	chr7	transcribed_unprocessed_pseudogene	PMS1 homolog 2, mismatch repair system component pseudogene 4
ENSG00000165417.12	6.53	6.75	6.29	5.33	5.6	5.07	GTF2A1	chr14	protein_coding	general transcription factor IIA subunit 1
ENSG00000165868.16	0.28	0.3	0.24	0.25	0.2	0.25	HSPA12A	chr10	protein_coding	heat shock protein family A (Hsp70) member 12A
ENSG00000155100.11	2.64	2.66	2.51	3.2	3.11	2.85	OTUD6B	chr8	protein_coding	OTU deubiquitinase 6B
ENSG00000101115.13	0	0.01	0.01	0.01	0.01	0	SALL4	chr20	protein_coding	spalt like transcription factor 4
ENSG00000224888.4	0.01	0.04	0.02	0.02	0.01	0.01	RP5-1142A6.2	chr16	lncRNA	--
ENSG00000272854.1	0.25	0.64	0.06	0.39	0.63	0.2	RP4-593H12.1	chr7	lncRNA	--
ENSG00000169410.10	3.81	3.53	3.68	3.67	3.58	3.47	PTPN9	chr15	protein_coding	protein tyrosine phosphatase non-receptor type 9
ENSG00000136636.13	11.86	12.14	12.24	9.05	9.9	9.39	KCTD3	chr1	protein_coding	potassium channel tetramerization domain containing 3
ENSG00000085999.13	3.15	3.23	3.26	4.21	4.22	3.95	RAD54L	chr1	protein_coding	RAD54 like
ENSG00000183258.12	16.59	16.99	17.25	19.36	18.36	19.4	DDX41	chr5	protein_coding	DEAD-box helicase 41
ENSG00000184575.12	9.38	8.73	9.11	10.9	10.38	10.03	XPOT	chr12	protein_coding	exportin for tRNA
ENSG00000268964.3	0.05	0.03	0.09	0.1	0.08	0.16	ERVV-2	chr19	protein_coding	endogenous retrovirus group V member 2, envelope
ENSG00000163964.18	7.3	7.64	7.56	6.34	6.66	6.44	PIGX	chr3	protein_coding	phosphatidylinositol glycan anchor biosynthesis class X
ENSG00000151694.14	2.23	2.06	2.11	2.87	2.91	2.71	ADAM17	chr2	protein_coding	ADAM metallopeptidase domain 17
ENSG00000223522.2	0	0	0	0.01	0	0	AC093690.1	chr2	lncRNA	--
ENSG00000267980.1	2.2	2.4	1.43	2	1.9	1.91	AC007292.6	chr19	lncRNA	--
ENSG00000231119.2	0.33	0.24	0.35	0.23	0.16	0.11	RP4-569M23.2	chr20	lncRNA	--
ENSG00000234335.1	0.04	0	0	0.04	0.08	0	RPS4XP11	chr10	processed_pseudogene	ribosomal protein S4X pseudogene 11
ENSG00000196588.20	2.28	2.15	2.35	2.36	2.5	2.68	MRTFA	chr22	protein_coding	myocardin related transcription factor A
ENSG00000279329.1	0.05	0	0	0	0.02	0.02	CTD-2553L13.9	chr19	TEC	--
ENSG00000166912.17	0.88	0.9	0.86	0.83	0.92	0.88	MTMR10	chr15	protein_coding	myotubularin related protein 10
ENSG00000059588.10	2.31	2.32	2.09	1.7	1.33	1.65	TARBP1	chr1	protein_coding	TAR (HIV-1) RNA binding protein 1
ENSG00000225146.1	0	0.05	0	0	0	0	AC073957.15	chr7	lncRNA	--
ENSG00000280347.1	0.37	0.28	0.24	0.3	0.25	0.25	AC000123.2	chr7	TEC	--
ENSG00000129128.13	14.47	15.05	14.9	17.31	17.34	16.9	SPCS3	chr4	protein_coding	signal peptidase complex subunit 3
ENSG00000144642.22	0.5	0.42	0.55	0.39	0.34	0.41	RBMS3	chr3	protein_coding	RNA binding motif single stranded interacting protein 3
ENSG00000233111.1	0.05	0.05	0	0.05	0.05	0.05	RAB1C	chr9	processed_pseudogene	RAB1C, member RAS oncogene family pseudogene
ENSG00000286373.1	0.01	0.05	0.01	0.06	0.04	0	RP11-111N20.1	chr10	lncRNA	--
ENSG00000286343.1	0	0	0	0.06	0	0	RP11-513N16.1	chr13	lncRNA	--
ENSG00000125695.12	2.61	2.77	2.98	2.94	3.66	3.14	RP11-51F16.8	chr17	protein_coding	--
ENSG00000119777.20	11.54	11.36	12.47	13.51	13.31	12.98	TMEM214	chr2	protein_coding	transmembrane protein 214
ENSG00000137221.14	6.51	6.27	6.3	6.78	6.25	7.07	TJAP1	chr6	protein_coding	tight junction associated protein 1
ENSG00000272379.1	0.26	0.43	1.52	0.27	0.6	0.35	RP1-257A7.5	chr6	lncRNA	--
ENSG00000179218.15	445.77	450.86	468.49	534.41	550.5	557.16	CALR	chr19	protein_coding	calreticulin
ENSG00000225213.2	0.18	0.17	0	0.05	0	0	RP11-197M22.2	chr10	lncRNA	--
ENSG00000254842.6	0.22	0.27	0.32	0.4	0.42	0.41	LINC02551	chr11	lncRNA	long intergenic non-protein coding RNA 2551
ENSG00000273706.5	0.01	0	0.01	0.01	0	0.01	LHX1	chr17	protein_coding	LIM homeobox 1
ENSG00000155542.12	1.72	1.97	1.5	1.97	1.76	2.09	SETD9	chr5	protein_coding	SET domain containing 9
ENSG00000214872.8	0	0	0	0.02	0	0	SMTNL1	chr11	protein_coding	smoothelin like 1
ENSG00000188917.15	5.31	5.79	6	5.98	6.02	6.13	TRMT2B	chrX	protein_coding	tRNA methyltransferase 2 homolog B
ENSG00000235316.1	0.31	0.34	0.29	0.29	0.24	0.24	DUSP8P5	chr10	processed_pseudogene	dual specificity phosphatase 8 pseudogene 5
ENSG00000228701.2	0.31	0.38	0.38	0.46	0.35	0.56	TNKS2-AS1	chr10	lncRNA	TNKS2 antisense RNA 1 (head to head)
ENSG00000224988.1	0	0	0.08	0	0	0	RP11-409K20.7	chr9	processed_pseudogene	--
ENSG00000136732.16	0.03	0	0.04	0.14	0.12	0.09	GYPC	chr2	protein_coding	glycophorin C (Gerbich blood group)
ENSG00000112539.15	0.01	0.04	0	0.01	0.03	0	C6orf118	chr6	protein_coding	chromosome 6 open reading frame 118
ENSG00000162733.19	0.06	0.06	0.04	0.04	0.08	0.03	DDR2	chr1	protein_coding	discoidin domain receptor tyrosine kinase 2
ENSG00000260518.2	0.01	0.06	0.01	0.01	0	0	BMS1P8	chr16	transcribed_unprocessed_pseudogene	BMS1 pseudogene 8
ENSG00000149289.11	3.42	3.55	3.39	5.03	5	5	ZC3H12C	chr11	protein_coding	zinc finger CCCH-type containing 12C
ENSG00000125447.18	3.64	3.27	3.37	4.12	3.89	4.24	GGA3	chr17	protein_coding	golgi associated, gamma adaptin ear containing, ARF binding protein 3
[truncated: 26,956 more rows]

## Sheet: AS Ratio
X.ID	Chr	Ass1	Ass2	Strand	Mss1	Mss2	Type	Isoform	KorN	NC_1.Ratio	NC_1.Alt_sj	NC_1.Model_sj	NC_1.isfiltered	NC_2.Ratio	NC_2.Alt_sj	NC_2.Model_sj	NC_2.isfiltered	NC_3.Ratio	NC_3.Alt_sj	NC_3.Model_sj	NC_3.isfiltered	siPCMT1_1.Ratio	siPCMT1_1.Alt_sj	siPCMT1_1.Model_sj	siPCMT1_1.isfiltered	siPCMT1_2.Ratio	siPCMT1_2.Alt_sj	siPCMT1_2.Model_sj	siPCMT1_2.isfiltered	siPCMT1_3.Ratio	siPCMT1_3.Alt_sj	siPCMT1_3.Model_sj	siPCMT1_3.isfiltered	Pvalue	DiffType	Symbol	Chr	GeneType	Description
known_NIR_38166	chr3	70977719	70977828	-	70977722	70977828	A3SS	ENST00000649528.3	known	0.39	12	19	y	0.39	12	19	y	0.41	11	16	y	0.52	14	13	y	0.52	26	24	y	0.52	13	12	y	0.002909	up	FOXP1	chr3	protein_coding	forkhead box P1
known_NIR_7596	chr11	35190065	35204512	+	35190065	35211246	A3SS	ENST00000434472.6	known	0.3	61	140	y	0.25	66	196	y	0.24	50	158	y	0.4	76	114	y	0.43	68	89	y	0.38	74	122	y	0.004802	up	CD44	chr11	protein_coding	CD44 molecule (Indian blood group)
known_NIR_29689	chr2	172498100	172504091	+	172498100;172501901	172501772;172504091	ES	ENST00000409532.5	known	0.6	70	32;60	y	0.65	83	28;62	y	0.71	96	27;51	y	0.44	73	69;118	y	0.46	71	56;110	y	0.35	49	69;114	y	0.007067	down	ITGA6	chr2	protein_coding	integrin subunit alpha 6
known_NIR_8364	chr11	62534074	62535003	-	62491831	62535003	A3SS	ENST00000257247.11	known	0.42	70	95	y	0.49	78	80	y	0.52	87	81	y	0.67	82	40	y	0.66	71	36	y	0.71	82	34	y	0.00891	up	AHNAK	chr11	protein_coding	AHNAK nucleoprotein
known_NIR_12801	chr12	6678460	6678946	-	6678710	6678946	3pMXE	ENST00000542351.5	known	0.36	15	27	y	0.31	8	18	y	0.27	9	24	y	0.6	27	18	y	0.46	25	29	y	0.56	25	20	y	0.014891	up	ZNF384	chr12	protein_coding	zinc finger protein 384
known_NIR_21133	chr17	37491627	37510677	+	37489958	37510677	A5SS	ENST00000617516.5	known	0.12	12	85	y	0.09	13	124	y	0.11	15	122	y	0.25	47	141	y	0.19	38	158	y	0.2	36	145	y	0.015623	up	DUSP14	chr17	protein_coding	dual specificity phosphatase 14
