# Supplementary material for: PCMT1 knockdown attenuates malignant properties by globally regulating transcriptome profiles in triple-negative breast cancer cells
Source: PeerJ. 2023 Nov 6;11:e16006. doi: 10.7717/peerj.16006 (PMC10634331; doi:10.7717/peerj.16006)
Supplement: Table S5 [file peerj-11-16006-s006.xlsx]

## Sheet: Ras_GO_enrichment_P
#Term	Database	ID	Input number	Background number	P-Value	Corrected P-Value	Input	Hyperlink
translation	Gene Ontology	GO:0006412	55	311	2.29448e-11	1.21837e-08	MRPL24|RPS11|SARS1|RPS15|RPS14|RPL6|EEF1A1|RPS19|RPL5|EIF2B2|RPL35A|EIF6|CARS2|RPS5|TARS2|MTIF2|MRPS11|RPL36A-HNRNPH2|RPS9|EIF5A|RPL22L1|EEF1D|MRPL55|TSFM|AARSD1|WARS1|RPL13A|MRPL51|MRPL52|MRPL36|MTRF1|EIF4G1|DHPS|MRPL33|DARS2|MRPS6|RPS29|RPL15|TNIP1|IGHMBP2|MRPL11|MRPS18C|RACK1|RPLP0|RPL37|RPL34|RPL35|MRPL43|UBA52|RPL17|QARS1|PSTK|EIF4A2|TBCE|MRPL37	http://amigo.geneontology.org/amigo/term/GO:0006412
cell cycle	Gene Ontology	GO:0007049	82	661	3.15005e-08	8.36337e-06	NSL1|TSG101|MDC1|RAD17|TUSC2|AHCTF1|ZWINT|ANAPC11|CTDP1|NDE1|ITGB3BP|FBXW11|CHAF1A|MLH1|CLTC|DBF4B|CHMP3|TXNL4A|PIN1|ANAPC10|CDK11A|BORA|NEK6|CEP164|PPP1R1C|CCNA1|MAD1L1|EVI5|MAP3K8|CDC34|NIPBL|CIB1|FIGN|SKA3|MICAL3|BIN3|AURKB|DLGAP5|ANXA11|BABAM1|MAD2L2|LZTS2|FANCI|CHEK1|SIRT2|MCM8|EPB41L2|SMARCB1|URGCP|STAG1|ZNRD2|CEP63|PPP2R2D|SUV39H2|HMGA2|RHNO1|CDK11B|TLK2|USP39|NASP|ING4|AURKA|ANAPC15|RACK1…	http://amigo.geneontology.org/amigo/term/GO:0007049
cell division	Gene Ontology	GO:0051301	55	412	6.18636e-07	8.20762e-05	TSG101|MAD2L2|MAD1L1|AHCTF1|ZWINT|ANAPC11|NSL1|CTDP1|CHMP3|ITGB3BP|CLTC|NDE1|TXNL4A|BORA|BIN3|NEK6|CEP164|PPP1R1C|SPART|CCNA1|RACGAP1|CDC34|ANAPC10|CIB1|CEP63|SKA3|MICAL3|AURKA|AURKB|EVI5|ANXA11|LZTS2|SIRT2|EPB41L2|FIGN|PPP2R2D|STAG1|HMGA2|PSRC1|USP39|ZNRD2|CCNB1|PARD3|CSNK1A1|PPP1CA|CCND3|CCNY|MITD1|ANAPC15|TERF1|BABAM1|SEPTIN7|SEPTIN9|UBE2S|SGO1	http://amigo.geneontology.org/amigo/term/GO:0051301
cytoplasmic translation	Gene Ontology	GO:0002181	20	86	6.74429e-07	8.20762e-05	RPL22L1|RPS11|RPL5|RPL35A|RPS15|RPL15|RPS14|RPL6|RPL37|RPS19|RPLP0|RPS5|RPL35|RPL13A|UBA52|RPL17|RPS29|RPL34|RPS9|RWDD1	http://amigo.geneontology.org/amigo/term/GO:0002181
protein transport	Gene Ontology	GO:0015031	78	667	7.72845e-07	8.20762e-05	SCFD1|RANGRF|VPS29|SIL1|SNX5|AHCTF1|AP1M2|YIF1A|VPS52|CHP1|RAB6A|AFTPH|UEVLD|AP3S2|RAB2A|TAP2|ARFGAP2|ARFGAP3|MCFD2|CHMP3|HGS|WASHC2A|CHMP5|EIF5A|COPZ1|COPZ2|SNX13|SNX12|SNX11|VPS28|BCAP29|COPE|PRAF2|RUFY1|SEC31A|MTX1|ENY2|CNIH4|ABCB9|TIMM8B|RAB17|TIMM17B|CD63|SCAMP3|LRSAM1|SCAMP1|HOOK2|MYO1C|RAMP1|TTC8|YKT6|TIMM9|NUP85|DUS4L-BCAP29|SNX19|YIF1B|SEC24B|NMD3|DENND1A|AP1B1|TIMM50|SEC22C|CHMP2B|NASP|…	http://amigo.geneontology.org/amigo/term/GO:0015031
translational initiation	Gene Ontology	GO:0006413	25	145	1.02717e-05	0.000795955	RPS11|RPS15|RPS14|RPL6|RPS19|RPL5|EIF2B2|RPL35A|EIF6|RPS5|MTIF2|RPS9|RPL13A|RPLP0|RPS29|RPL15|RPL17|BRF1|RPL37|EIF4G1|RPL35|PAIP1|UBA52|RPL34|EIF4A2	http://amigo.geneontology.org/amigo/term/GO:0006413
nuclear-transcribed mRNA catabolic process, nonsense-mediated decay	Gene Ontology	GO:0000184	22	119	1.10181e-05	0.000795955	RPS11|RPS15|RPS14|RPL6|RPS19|RPL5|RPL35A|RPS5|RPS9|UBA52|RPL13A|RPLP0|RNPS1|RPS29|RPL15|RPL17|PYM1|RPL37|EIF4G1|RPL35|UPF3A|RPL34	http://amigo.geneontology.org/amigo/term/GO:0000184
viral transcription	Gene Ontology	GO:0019083	21	111	1.19918e-05	0.000795955	NUP85|RPS11|RPL35|RPL35A|RPS15|RPL13A|RPL6|RPL37|RPS19|RPLP0|RPS5|RPL5|RPS29|GTF2B|RPL15|UBA52|NUP50|RPS14|RPL17|RPL34|RPS9	http://amigo.geneontology.org/amigo/term/GO:0019083
endoplasmic reticulum to Golgi vesicle-mediated transport	Gene Ontology	GO:0006888	29	187	1.74899e-05	0.00100188	RANGRF|SCFD1|DYNLL1|SPTAN1|SEC24B|DUS4L-BCAP29|RAB2A|ARFGAP2|ARFGAP3|SEC31A|COPZ1|COPZ2|CNIH4|DYNC1I1|BCAP29|PDCD6|STEEP1|PEF1|SEC22C|COPE|YKT6|YIF1B|YIF1A|MCFD2|BCAP31|TRAPPC1|TRAPPC5|ANK1|GOSR2	http://amigo.geneontology.org/amigo/term/GO:0006888
positive regulation of protein targeting to membrane	Gene Ontology	GO:0090314	10	31	2.02274e-05	0.00100188	TCAF1|ITGB2|MFF|CHP1|FYN|MYO1C|FIS1|CIB1|ITGB1BP1|PAK1	http://amigo.geneontology.org/amigo/term/GO:0090314
DNA repair	Gene Ontology	GO:0006281	49	397	2.18528e-05	0.00100188	MAD2L2|RAD17|ERCC1|ERCC2|POLG2|UBE2D3|ERCC6|CHAF1A|POLB|OGG1|ACTL6A|CEP164|POLE2|NSMCE4A|CHD1L|PARPBP|NPM1|PARK7|MLH1|ENDOV|RAD51AP1|FANCC|FANCA|RNF111|TAOK3|FANCI|CHEK1|HUWE1|PRIMPOL|SPIDR|MDC1|USP10|IGHMBP2|TEX264|RAD51C|RAD51B|MCM8|SMUG1|CYREN|DOT1L|UBE2A|UBE2B|RPA3|BABAM1|NSMCE1|ASCC2|ASCC1|RPAIN|TFPT	http://amigo.geneontology.org/amigo/term/GO:0006281
SRP-dependent cotranslational protein targeting to membrane	Gene Ontology	GO:0006614	18	90	2.26413e-05	0.00100188	RPS11|RPL35|RPL5|RPS15|RPL15|RPS14|RPL6|RPL37|RPS19|RPLP0|RPS5|RPL35A|RPS29|RPL13A|UBA52|RPL17|RPL34|RPS9	http://amigo.geneontology.org/amigo/term/GO:0006614
viral process	Gene Ontology	GO:0016032	66	596	3.19405e-05	0.00128005	TSG101|RACK1|FBXW11|DYNLL1|PI4KB|ERCC2|NUP85|BAX|CD151|TAP2|GTF2A2|SMARCB1|CBX5|CPSF4|TSC2|FBLN1|DLG1|OPTN|SKP2|STAT2|BIN1|VPS29|FYN|ABI1|GTF2B|CFLAR|DERL2|HNRNPK|HNRNPA2B1|PSMA4|PRKRA|IFI27|KHDRBS3|SLC20A1|BCAP31|HNRNPA1|ITGB5|VRK2|CD46|IRAK1|ANXA2|RAB6A|ATG12|SET|DAG1|SND1|IPO7|BRD4|NPM1|BTRC|IRF3|NUP50|PPP1CA|TRIM5|EIF4G1|SYNGR2|SCRIB|BANF1|DCAF1|G3BP1|KLC1|PSMB5|TRIM6|COPS7B|PPIA|EIF4A2	http://amigo.geneontology.org/amigo/term/GO:0016032
vesicle-mediated transport	Gene Ontology	GO:0016192	38	285	3.3749e-05	0.00128005	SCFD1|BCAP29|AP1M2|TRAPPC5|YIF1A|AHI1|DUS4L-BCAP29|RAB2A|STXBP2|ARFGAP2|ARFGAP3|CLTC|TSC2|SEC31A|GSN|COPZ1|OPTN|CNIH4|COPE|CCZ1B|KXD1|CCZ1|AP1B1|BCAP31|SPAG9|YKT6|RAB6A|COPZ2|SEC24B|MCFD2|SEC22C|AP3S2|TRAPPC1|RAB29|SPIRE1|GOSR2|YIPF2|PICALM	http://amigo.geneontology.org/amigo/term/GO:0016192
hemidesmosome assembly	Gene Ontology	GO:0031581	6	12	5.63094e-05	0.00187251	DST|ITGA6|CD151|PLEC|LAMB3|COL17A1	http://amigo.geneontology.org/amigo/term/GO:0031581
cellular response to DNA damage stimulus	Gene Ontology	GO:0006974	58	514	5.6422e-05	0.00187251	MAD2L2|FOXP1|RAD17|ERCC1|ERCC2|HUWE1|UBE2D3|ERCC6|CHAF1A|POLB|NSMCE1|CBX5|OGG1|CEP164|CHCHD6|CHD1L|PARPBP|PARK7|MLH1|PRIMPOL|RAD51AP1|NIPBL|CIB1|FANCC|FANCA|RNF111|TAOK3|FANCI|CHEK1|SMUG1|HMCES|SPIDR|CEP63|MDC1|RHNO1|UBE2E2|USP10|BAX|MACROD1|TEX264|BRD4|NSMCE4A|RAD51C|RAD51B|MCM8|IRF3|CYREN|TLK2|UBE2A|UBE2B|RPA3|PAK1|BABAM1|ACTL6A|ASCC2|ASCC1|TFPT|PHF1	http://amigo.geneontology.org/amigo/term/GO:0006974
mitochondrial translational elongation	Gene Ontology	GO:0070125	17	88	6.02731e-05	0.00188265	MRPL36|MRPL37|MRPS11|MRPL11|TSFM|MRPS27|MRPL24|MRPS10|MRPS18C|MRPL43|MRPL55|DAP3|MRPL51|MRPL52|MRPS6|MRPL48|MRPL33	http://amigo.geneontology.org/amigo/term/GO:0070125
negative regulation of protein binding	Gene Ontology	GO:0032091	15	72	6.53936e-05	0.00192911	SYMPK|PPP1CA|PARK7|DTNBP1|MITD1|BAX|AURKA|AURKB|CTNNBIP1|TMBIM6|PIN1|ITGB1BP1|MAPK8|PPARA|RACK1	http://amigo.geneontology.org/amigo/term/GO:0032091
mitochondrial translational termination	Gene Ontology	GO:0070126	17	89	6.99477e-05	0.00195486	MRPL36|MRPL37|MRPL33|MRPS11|MRPL11|MRPL24|MRPS6|MRPS10|MRPS18C|MRPL43|MRPL55|DAP3|MRPL51|MRPL52|MRPS27|MTRF1|MRPL48	http://amigo.geneontology.org/amigo/term/GO:0070126
mitochondrial respiratory chain complex I assembly	Gene Ontology	GO:0032981	14	66	9.24791e-05	0.00245532	NDUFC1|TIMMDC1|NDUFA3|NDUFB6|COA1|FOXRED1|TAZ|NDUFS3|NDUFAF7|NDUFAF6|NDUFS4|NDUFA12|NDUFAF2|NDUFS8	http://amigo.geneontology.org/amigo/term/GO:0032981
protein N-linked glycosylation via asparagine	Gene Ontology	GO:0018279	9	30	0.000100005	0.00252871	ALG8|TUSC3|RPN2|ALG5|MGAT1|MCFD2|STT3A|DAD1|FUT8	http://amigo.geneontology.org/amigo/term/GO:0018279
positive regulation of protein dephosphorylation	Gene Ontology	GO:0035307	8	26	0.000200725	0.00484478	PPP1R7|CALM2|SYMPK|NSMF|PTPA|CAMTA1|PIN1|PPIA	http://amigo.geneontology.org/amigo/term/GO:0035307
positive regulation of I-kappaB kinase/NF-kappaB signaling	Gene Ontology	GO:0043123	26	184	0.000222944	0.0051471	CD74|TRIM13|ZDHHC13|NEK6|PPM1A|FYN|CFLAR|NOD1|TMEM9B|S100A4|IRAK1|SLC44A2|CHUK|BRD4|UBE2V1|IRF3|SLC20A1|EEF1D|LITAF|TRIM8|TLR4|BST2|FLNA|TRIM5|SHARPIN|TRIM6	http://amigo.geneontology.org/amigo/term/GO:0043123
negative regulation of protein kinase activity	Gene Ontology	GO:0006469	16	89	0.000236722	0.00522023	PRKAG2|LRP6|QARS1|PARK7|PKIG|CHP1|WARS1|CEACAM1|CIB1|AKT1S1|TSC2|DTNBP1|ITGB1BP1|GADD45B|PPIA|TAOK3	http://amigo.geneontology.org/amigo/term/GO:0006469
mitotic spindle organization	Gene Ontology	GO:0007052	20	126	0.000245773	0.00522023	NSL1|NEK6|CCNB1|DYNC1I1|CENPK|AHCTF1|MAD1L1|ZWINT|TBCE|NUP85|WDR62|ITGB3BP|CENPM|AURKA|AURKB|DLGAP5|NDE1|DYNLL1|SGO1|PTPA	http://amigo.geneontology.org/amigo/term/GO:0007052
response to UV	Gene Ontology	GO:0009411	11	49	0.000304806	0.00622508	RO60|UBE2A|CIRBP|ERCC2|UBE2B|ERCC6|USF1|PRKAA1|PRIMPOL|MAPK8|RPAIN	http://amigo.geneontology.org/amigo/term/GO:0009411
intracellular protein transport	Gene Ontology	GO:0006886	38	320	0.00038486	0.00756891	SCFD1|CD74|BCAP29|IFT22|AP1M2|SORCS2|RAB6A|DUS4L-BCAP29|ARFRP1|STXBP2|ARFGAP3|CLTC|SEC31A|COPZ1|COPZ2|SNX13|SNX5|SNX11|TBC1D1|VPS29|YWHAH|EVI5|PDCD6|AP1B1|RAB17|SIL1|CTSA|RAMP1|HGS|SEC24B|NPM1|BCAP31|AP3S2|RAB29|TBC1D22A|MYO6|IPO7|MLPH	http://amigo.geneontology.org/amigo/term/GO:0006886
protein K11-linked ubiquitination	Gene Ontology	GO:0070979	8	29	0.000461044	0.00874337	UBE2A|UBE2B|ANAPC11|UBE2D3|ANAPC10|UBE2S|UBE2E2|RNF4	http://amigo.geneontology.org/amigo/term/GO:0070979
retrograde transport, endosome to Golgi	Gene Ontology	GO:0042147	14	77	0.000505668	0.0090635	RAB29|SNX5|SPAG9|PLEKHJ1|HEATR5A|VPS29|RAB6A|YKT6|ARFRP1|WASHC2A|CLTC|EVI5|GOSR2|VPS52	http://amigo.geneontology.org/amigo/term/GO:0042147
protein K48-linked ubiquitination	Gene Ontology	GO:0070936	12	60	0.000512062	0.0090635	UBE2B|SKP2|ARIH2|UBE2A|UBE2E1|IFI27|BTRC|CDC34|UBE2D3|UBE2E2|RNF115|RNF4	http://amigo.geneontology.org/amigo/term/GO:0070936
protein N-linked glycosylation	Gene Ontology	GO:0006487	10	46	0.000744805	0.0121039	ST3GAL1|ALG9|TUSC3|RPN2|ALG5|MGAT1|ALG8|STT3A|DAD1|FUT8	http://amigo.geneontology.org/amigo/term/GO:0006487
base-excision repair	Gene Ontology	GO:0006284	8	31	0.000752222	0.0121039	SMUG1|ERCC6|HUWE1|HMGA2|RPA3|HMGA1|POLB|OGG1	http://amigo.geneontology.org/amigo/term/GO:0006284
regulation of tumor necrosis factor-mediated signaling pathway	Gene Ontology	GO:0010803	8	31	0.000752222	0.0121039	TAX1BP1|MADD|OTULIN|CHUK|CFLAR|SPPL2A|SHARPIN|RACK1	http://amigo.geneontology.org/amigo/term/GO:0010803
apoptotic process	Gene Ontology	GO:0006915	68	692	0.000807311	0.0126083	TNFSF12|DPF1|DYNLL1|TFPT|ERCC2|UBE2D3|RASSF7|DUS4L-BCAP29|PDCD10|ITGB3BP|BOK|IFI27L1|POLB|CHMP3|APLP1|DAD1|CRADD|HTRA2|EIF5A|NEK6|MADD|BCL2L12|TCTN3|GADD45B|BCAP29|HINT1|CFLAR|CIB1|NOD1|PDCD6|CITED1|HIP1R|DAPK3|SH3KBP1|PRDX5|BCAP31|ITGB2|ACIN1|CDK11A|CDK11B|AIM2|DAP3|MTFP1|IFI27|BAX|ING4|TMBIM6|PAWR|RACK1|TAX1BP1|TAF6|IRF1|PLSCR3|NME3|GSN|XKR8|RTKN|TIA1|FIS1|SRA1|TMEM214|IRF3|TMEM219|CHEK1|PUF60|…	http://amigo.geneontology.org/amigo/term/GO:0006915
tRNA processing	Gene Ontology	GO:0008033	16	101	0.00101184	0.0153511	SARS1|TRMU|TRNT1|TSEN15|TRMT1|TRMT61A|DUS4L-BCAP29|TRMT2B|TSEN2|POP5|MTO1|DUS3L|ELP6|CDK5RAP1|POP4|DTWD1	http://amigo.geneontology.org/amigo/term/GO:0008033
negative regulation of translation	Gene Ontology	GO:0017148	14	83	0.00109709	0.016182	RBM4|GIGYF2|CIRBP|NANOS3|CNOT10|TIA1|RPL13A|CNOT8|CAPRIN2|CNOT7|SAMD4B|DAPK3|SHMT2|RACK1	http://amigo.geneontology.org/amigo/term/GO:0017148
regulation of mRNA splicing, via spliceosome	Gene Ontology	GO:0048024	6	20	0.00148766	0.0213499	SRSF3|LARP7|KHDRBS3|TIA1|HNRNPK|RBM23	http://amigo.geneontology.org/amigo/term/GO:0048024
anaphase-promoting complex-dependent catabolic process	Gene Ontology	GO:0031145	14	86	0.00156332	0.0213604	CCNB1|SKP2|PSMA4|UBE2E1|PSMD1|ANAPC11|ANAPC10|PSME1|ANAPC15|UBA52|AURKA|AURKB|UBE2S|PSMB5	http://amigo.geneontology.org/amigo/term/GO:0031145
ribosomal small subunit assembly	Gene Ontology	GO:0000028	5	14	0.00156884	0.0213604	RPS5|RPS19|RPS15|MRPS11|RPS14	http://amigo.geneontology.org/amigo/term/GO:0000028
regulation of endocytosis	Gene Ontology	GO:0030100	8	35	0.00176976	0.0234936	SNX12|RUFY1|TSC2|OPHN1|PICALM|BIN1|RAB17|HIP1R	http://amigo.geneontology.org/amigo/term/GO:0030100
cellular response to thyroid hormone stimulus	Gene Ontology	GO:0097067	5	15	0.00222511	0.0281318	CTSH|GAS2L1|CTSB|CTSL|RDX	http://amigo.geneontology.org/amigo/term/GO:0097067
wound healing, spreading of cells	Gene Ontology	GO:0044319	5	15	0.00222511	0.0281318	CEACAM1|FLNA|CD44|PDCD10|CD151	http://amigo.geneontology.org/amigo/term/GO:0044319
regulation of protein localization	Gene Ontology	GO:0032880	12	71	0.00238519	0.0291598	BORA|SIX4|TBC1D1|DNAJB6|TTC8|PLEKHM2|B9D1|MAPK8|RACK1|TRIM5|PICALM|TRIM6	http://amigo.geneontology.org/amigo/term/GO:0032880
regulation of mitochondrial membrane potential	Gene Ontology	GO:0051881	7	29	0.00243993	0.0291598	SPART|TUSC2|PARK7|BAX|SLC25A36|PPA2|UCP2	http://amigo.geneontology.org/amigo/term/GO:0051881
protein K63-linked ubiquitination	Gene Ontology	GO:0070534	9	45	0.00251169	0.0291598	ARIH2|PELI3|UBE2B|UBE2E2|RNF115|UBE2V1|RNF4|TRIM5|UBE2S	http://amigo.geneontology.org/amigo/term/GO:0070534
negative regulation of protein catabolic process	Gene Ontology	GO:0042177	8	37	0.00257895	0.0291598	MAD2L2|SIRT2|SNX12|PARK7|FYN|NRG1|FLNA|PIN1	http://amigo.geneontology.org/amigo/term/GO:0042177
negative regulation of protein phosphorylation	Gene Ontology	GO:0001933	13	81	0.002581	0.0291598	CTDSPL|CCNB1|LRP6|SPAG9|PARK7|CHP1|WARS1|CIB1|MYADM|PIP5KL1|FBLN1|CTDSP1|PPIA	http://amigo.geneontology.org/amigo/term/GO:0001933
apoptotic signaling pathway	Gene Ontology	GO:0097190	12	72	0.00269245	0.0297852	TYROBP|IFI27|BAX|CFLAR|DAP3|IFI27L1|TLR4|PDCD6|PAWR|TFPT|DAPK3|CRADD	http://amigo.geneontology.org/amigo/term/GO:0097190
regulation of mitotic cell cycle phase transition	Gene Ontology	GO:1901990	13	82	0.00288445	0.031258	CCNB1|ANAPC15|UBE2E1|ERCC2|BTRC|PSMD1|ANAPC10|PSME1|MAD1L1|PSMA4|UBE2S|PSMB5|ANAPC11	http://amigo.geneontology.org/amigo/term/GO:1901990
germ cell development	Gene Ontology	GO:0007281	8	38	0.00307918	0.0327009	ZFX|FBXW11|ERCC1|NANOS3|DEAF1|BAX|BMP4|FANCC	http://amigo.geneontology.org/amigo/term/GO:0007281
neutrophil degranulation	Gene Ontology	GO:0043312	48	480	0.00319292	0.0332439	CYFIP1|SPTAN1|EEF1A1|HUWE1|PSMD1|RAB6A|AGA|NCSTN|MGST1|SVIP|DYNLL1|DERA|GSN|HSP90AB1|COMMD9|TYROBP|SCAMP1|IMPDH1|ITGB2|CEACAM1|CAPN1|CTSA|PKM|CTSH|SLC44A2|ANXA2|CD63|RAC1|CD44|CTSB|BST2|VCL|UNC13D|GRN|CYSTM1|RHOF|SERPINB6|PRCP|NME2|TRAPPC1|DNAJC5|PSAP|STXBP2|BST1|AGPAT2|PTGES2|GUSB|PPIA	http://amigo.geneontology.org/amigo/term/GO:0043312
interleukin-12-mediated signaling pathway	Gene Ontology	GO:0035722	9	47	0.00342724	0.0337012	ANXA2|HNRNPDL|TALDO1|RPLP0|AIP|SNRPA1|TCP1|HNRNPA2B1|PPIA	http://amigo.geneontology.org/amigo/term/GO:0035722
regulation of mitotic cell cycle	Gene Ontology	GO:0007346	9	47	0.00342724	0.0337012	NEK6|THAP1|CDK10|CDK11A|RPA3|CDK11B|SRA1|DLGAP5|DAPK3	http://amigo.geneontology.org/amigo/term/GO:0007346
substantia nigra development	Gene Ontology	GO:0021762	9	47	0.00342724	0.0337012	SIRT2|DYNLL1|CNP|GNB4|ATP5PF|MAPKAP1|YWHAH|NDUFS3|CALM2	http://amigo.geneontology.org/amigo/term/GO:0021762
viral protein processing	Gene Ontology	GO:0019082	8	39	0.0036517	0.0340818	ST3GAL1|TUSC3|ST3GAL4|RPN2|MGAT1|STT3A|DAD1|FUT8	http://amigo.geneontology.org/amigo/term/GO:0019082
positive regulation of protein targeting to mitochondrion	Gene Ontology	GO:1903955	7	31	0.0036585	0.0340818	RAC2|ARIH2|HUWE1|UBE2D3|PRKAA1|BAP1|HTRA2	http://amigo.geneontology.org/amigo/term/GO:1903955
protein targeting to mitochondrion	Gene Ontology	GO:0006626	7	31	0.0036585	0.0340818	TIMM17B|BCAP31|MFF|AIP|TIMM9|FIS1|TIMM8B	http://amigo.geneontology.org/amigo/term/GO:0006626
regulation of actin cytoskeleton organization	Gene Ontology	GO:0032956	12	75	0.00381179	0.0348976	TWF2|RAC2|RAC1|RHOQ|CDK10|DMTN|BST1|BST2|BAIAP2|HIP1R|RHOF|PAK1	http://amigo.geneontology.org/amigo/term/GO:0032956
RNA metabolic process	Gene Ontology	GO:0016070	9	48	0.00397385	0.0353097	RBFOX2|HNRNPA1|HNRNPK|HNRNPH1|HNRNPA2B1|POP5|HNRNPC|ATXN2|POLR2H	http://amigo.geneontology.org/amigo/term/GO:0016070
cellular protein modification process	Gene Ontology	GO:0006464	15	105	0.004029	0.0353097	TSG101|ARPC4-TTLL3|NAGPA|UBE2M|RPN2|CDC34|UBE2D3|PPP4R2|NEDD8|ST3GAL1|UBA52|RIMKLB|UEVLD|BAP1|UBE2S	http://amigo.geneontology.org/amigo/term/GO:0006464
cell projection assembly	Gene Ontology	GO:0030031	6	24	0.00410795	0.0353097	CYFIP1|RAC1|RHOQ|RAC2|CAPG|GSN	http://amigo.geneontology.org/amigo/term/GO:0030031
protein polyubiquitination	Gene Ontology	GO:0000209	30	270	0.00412279	0.0353097	FBXW11|HUWE1|PSMD1|UBE2D3|RC3H1|JADE2|SKP2|PELI3|CDC34|RNF115|WSB1|PSMA4|RNF111|ARIH2|LRSAM1|UBE2E1|PSME1|UBE2V1|UBE2E2|UBE2S|BTRC|RNF167|UBE2A|UBE2B|FBXL5|UBA52|RUSC1|PSMB5|TRIM5|TRIM6	http://amigo.geneontology.org/amigo/term/GO:0000209
post-Golgi vesicle-mediated transport	Gene Ontology	GO:0006892	10	58	0.00461865	0.0389286	SCFD1|SCAMP3|SCAMP1|SH3D19|DTNBP1|HGS|AP1M2|CLTC|DNM2|AP1B1	http://amigo.geneontology.org/amigo/term/GO:0006892
mitochondrial fission	Gene Ontology	GO:0000266	5	18	0.00537029	0.0445566	MTFP1|FIS1|MFF|MTFR1L|DNM2	http://amigo.geneontology.org/amigo/term/GO:0000266
phosphorylation	Gene Ontology	GO:0016310	64	697	0.00557674	0.0455577	PCK2|MAP4K2|MAP4K4|PTK6|CNKSR1|PRKAG2|PRKAA1|MAP2K2|STK19|TPK1|CHKA|PI4KB|NEK6|MAP3K8|GRK4|CALM2|PRPS1|CIITA|CDK10|CDK16|PFKP|MAPKAP1|CDK11A|AURKA|AURKB|NME1-NME2|MAPK8|PRKRA|DAPK3|PIP5KL1|CHEK1|ITPK1|YWHAZ|TRIO|STK40|VRK2|UCK1|FYN|CHUK|CDK11B|TLK2|MAST1|GUK1|SKP2|HGS|IP6K2|TAOK3|STK32C|MARK3|IRAK1|CSNK1A1|NME2|NME3|PKIG|SH3KBP1|MOK|MET|DCAF1|DTYMK|PKM|PSTK|SPEG|CLK3|PAK1	http://amigo.geneontology.org/amigo/term/GO:0016310
positive regulation of substrate adhesion-dependent cell spreading	Gene Ontology	GO:1900026	8	42	0.00587059	0.0472316	RAC1|ARPC2|MYADM|DMTN|UNC13D|CIB1|DNM2|FLNA	http://amigo.geneontology.org/amigo/term/GO:1900026
RNA splicing	Gene Ontology	GO:0008380	32	301	0.00605004	0.0479488	RBM4|FUS|PPP4R2|GEMIN7|PUF60|ZMAT2|ZMAT5|HNRNPH1|TXNL4A|SRSF3|USB1|SNRPA1|HNRNPK|HNRNPA2B1|MBNL1|HNRNPC|CLASRP|ACIN1|SREK1IP1|RNPS1|LARP7|HNRNPA1|USP39|THOC5|ZNF638|CCDC130|RBFOX2|SRRM2|PQBP1|DDX5|RBM23|SRSF11	http://amigo.geneontology.org/amigo/term/GO:0008380
receptor clustering	Gene Ontology	GO:0043113	6	26	0.00626931	0.048003	DLG1|SCRIB|ITGB2|AGRN|FLNA|ITGB1BP1	http://amigo.geneontology.org/amigo/term/GO:0043113
DNA damage checkpoint	Gene Ontology	GO:0000077	7	34	0.00628756	0.048003	RAD17|CEP63|RHNO1|ERCC6|TIPRL|DOT1L|CHEK1	http://amigo.geneontology.org/amigo/term/GO:0000077
mRNA splicing, via spliceosome	Gene Ontology	GO:0000398	28	255	0.00639854	0.048003	RBM4|FUS|SYMPK|GEMIN7|PUF60|ZMAT2|HNRNPH1|TXNL4A|CPSF4|CPSF1|SRSF3|SNRPA1|PAPOLA|HNRNPK|HNRNPA2B1|HNRNPC|SRRM2|RNPS1|HNRNPA1|USP39|POLR2H|SNRNP70|SRRT|DDX42|PQBP1|DDX5|SRSF11|ZMAT5	http://amigo.geneontology.org/amigo/term/GO:0000398
RNA processing	Gene Ontology	GO:0006396	14	100	0.00641848	0.048003	RBM4|HNRNPDL|LARP7|RTCA|RBMS2|TARBP1|EXOSC8|HNRNPK|RBMS1|TRMT2B|HNRNPH1|POP4|TRNT1|ATXN1	http://amigo.geneontology.org/amigo/term/GO:0006396
actin cytoskeleton organization	Gene Ontology	GO:0030036	21	176	0.00680016	0.0481695	AMOTL1|ARHGEF11|PDLIM7|RAC2|STARD8|PDLIM2|RAC1|TYROBP|SPIRE1|OPHN1|DNAJB6|EHBP1L1|INF2|PFN2|CORO1B|CLN3|NPHP4|FLNA|DMTN|ATXN3|GSN	http://amigo.geneontology.org/amigo/term/GO:0030036
rRNA processing	Gene Ontology	GO:0006364	24	210	0.00684209	0.0481695	RPS15|RPS14|RPL6|RPS19|RPLP0|RPL35A|EXOSC8|EXOSC3|RPS9|DDX10|RPL13A|MRM2|RPL5|POP5|SENP3|RPL15|RPL17|RPL37|RPL34|RPL35|UBA52|EMG1|POP4|FCF1	http://amigo.geneontology.org/amigo/term/GO:0006364
negative regulation of protein localization to plasma membrane	Gene Ontology	GO:1903077	5	19	0.00689432	0.0481695	NUMB|RHOQ|PICALM|CLTC|PPFIA1	http://amigo.geneontology.org/amigo/term/GO:1903077
myelination in peripheral nervous system	Gene Ontology	GO:0022011	5	19	0.00689432	0.0481695	NRG1|SIRT2|PARD3|DAG1|SH3TC2	http://amigo.geneontology.org/amigo/term/GO:0022011
actin filament capping	Gene Ontology	GO:0051693	5	19	0.00689432	0.0481695	GSN|SPTAN1|CAPG|RDX|DMTN	http://amigo.geneontology.org/amigo/term/GO:0051693
regulation of cell cycle	Gene Ontology	GO:0051726	19	155	0.00734618	0.0498934	SIRT2|IRF1|SKP2|NPM1|GADD45B|BTRC|CDK16|MADD|BAX|FBXL6|MOK|CCNB1|YY1AP1|CCND3|BAP1|DOT1L|TSC2|NANOS3|RACK1	http://amigo.geneontology.org/amigo/term/GO:0051726
lamellipodium assembly	Gene Ontology	GO:0030032	7	35	0.00741701	0.0498934	CYFIP1|RAC1|S1PR1|VCL|NUP85|DMTN|ABLIM1	http://amigo.geneontology.org/amigo/term/GO:0030032
nucleobase-containing small molecule interconversion	Gene Ontology	GO:0015949	6	27	0.00761474	0.0498934	NME2|CTPS1|NME3|GUK1|RRM1|DTYMK	http://amigo.geneontology.org/amigo/term/GO:0015949
stress-activated MAPK cascade	Gene Ontology	GO:0051403	6	27	0.00761474	0.0498934	MAP3K8|FBXW11|BTRC|CHUK|UBA52|MAPK8	http://amigo.geneontology.org/amigo/term/GO:0051403
positive regulation of apoptotic process	Gene Ontology	GO:0043065	38	379	0.00775623	0.0498934	ITGA6|NCSTN|ITGB3BP|BOK|DIABLO|DNM2|BIN1|CRADD|HTRA2|HIP1R|APH1B|TCTN3|GADD45B|PRR7|FOSL1|MAPK8|DAPK3|PIP5KL1|FANK1|ARHGEF11|TRIO|RNPS1|CALHM2|QRICH1|ACIN1|HMGA2|PPARG|BAX|ING4|PAWR|IP6K2|RACK1|BMP4|SPDEF|SCRIB|PTPA|UBA52|TFPT	http://amigo.geneontology.org/amigo/term/GO:0043065
positive regulation of protein serine/threonine kinase activity	Gene Ontology	GO:0071902	9	53	0.00779877	0.0498934	CALM2|HMGA2|CIB1|HSP90AB1|MAP2K2|EZH2|DBF4B|PDCD10|TELO2	http://amigo.geneontology.org/amigo/term/GO:0071902
negative regulation of Wnt signaling pathway	Gene Ontology	GO:0030178	9	53	0.00779877	0.0498934	LZTS2|GRB10|TLE1|CTNNBIP1|C12orf43|TSC2|CITED1|VGLL4|RACK1	http://amigo.geneontology.org/amigo/term/GO:0030178
positive regulation of transcription, DNA-templated	Gene Ontology	GO:0045893	66	735	0.0080569	0.0509311	MAD2L2|CD74|TRIM13|FBXW11|RNF10|FUS|SNX5|PCBD2|ASPH|TSG101|AIP|MAP2K2|ZFP90|DNM2|SMARCA1|ELF2|NUP85|TRIM5|PPM1A|SIX4|CIITA|DEAF1|MED24|YWHAH|USF1|RNF111|ENY2|CITED1|FANK1|SRA1|EDF1|ARHGEF11|ESRRA|TCF3|QRICH1|HMGA2|IRF1|RXRB|CHUK|EHF|PPARG|PPARA|ING4|UBE2V1|RBM23|HMGA1|NPM1|BLOC1S2|IRF3|PSRC1|BMP4|LRP6|NME2|PTGES2|BTRC|PQBP1|TRIM8|ZKSCAN3|SREBF1|ACTL6A|TADA2A|BRD4|RNF4|POU2F2|PICALM|HIVEP3	http://amigo.geneontology.org/amigo/term/GO:0045893
viral life cycle	Gene Ontology	GO:0019058	13	93	0.00855657	0.0524757	TSG101|NUP50|DYNLL1|DYNC1I1|VPS28|NUP85|CHMP2B|UBA52|EZH2|CHMP5|CHMP3|HNRNPK|PPIA	http://amigo.geneontology.org/amigo/term/GO:0019058
mitochondrion morphogenesis	Gene Ontology	GO:0070584	5	20	0.00869654	0.0524757	SSBP1|FIS1|MFF|BAX|POLG2	http://amigo.geneontology.org/amigo/term/GO:0070584
inner mitochondrial membrane organization	Gene Ontology	GO:0007007	5	20	0.00869654	0.0524757	MICOS10|CHCHD6|MTX1|TAZ|MAIP1	http://amigo.geneontology.org/amigo/term/GO:0007007
regulation of peptidyl-tyrosine phosphorylation	Gene Ontology	GO:0050730	5	20	0.00869654	0.0524757	FYN|PDGFC|BST1|ITGB2|PPP2R5B	http://amigo.geneontology.org/amigo/term/GO:0050730
DNA replication	Gene Ontology	GO:0006260	19	158	0.00897019	0.0530378	POLB|NASP|SET|RAD17|NAP1L1|CHAF1A|POLG2|RHNO1|RPA3|ORC3|SSBP1|CHTF8|IGHMBP2|POLE2|RRM1|ING4|RBMS1|CHEK1|MCM8	http://amigo.geneontology.org/amigo/term/GO:0006260
lysosome organization	Gene Ontology	GO:0007040	8	45	0.00898946	0.0530378	NAGPA|HOOK2|NAGLU|ZKSCAN3|CLN3|ABCA1|GRN|CHMP5	http://amigo.geneontology.org/amigo/term/GO:0007040
G2/M transition of mitotic cell cycle	Gene Ontology	GO:0000086	17	137	0.00964091	0.0562563	SKP2|CEP164|CCNB1|OPTN|CALM2|CCDC57|CEP63|BTRC|CCNY|FBXL6|FBXW11|AURKA|DNM2|NDE1|DYNLL1|BORA|CHEK1	http://amigo.geneontology.org/amigo/term/GO:0000086
cellular response to insulin stimulus	Gene Ontology	GO:0032869	14	105	0.00980591	0.0564922	PCK2|CYFIP1|PPARG|HDAC9|RHOQ|UCP2|CEACAM1|CFLAR|SREBF1|USF1|SRD5A1|PPAT|PAK1|PKM	http://amigo.geneontology.org/amigo/term/GO:0032869
mRNA processing	Gene Ontology	GO:0006397	38	385	0.00989412	0.0564922	RBM4|SYMPK|PPP4R2|PQBP1|PUF60|ZMAT2|HNRNPH1|TXNL4A|CPSF4|CPSF1|SRSF3|SNRPA1|HNRNPK|HNRNPA2B1|MBNL1|SNRNP70|CLASRP|TSEN2|ACIN1|SREK1IP1|RNPS1|LARP7|HNRNPA1|USP39|KHDRBS3|PAPOLA|THOC5|HNRNPC|RBFOX2|SRRT|TSEN15|SRRM2|GEMIN7|DDX5|SUPT4H1|RBM23|SRSF11|ZMAT5	http://amigo.geneontology.org/amigo/term/GO:0006397
regulation of exit from mitosis	Gene Ontology	GO:0007096	7	37	0.0101155	0.0569167	SIRT2|ANAPC15|ANAPC11|UBE2E1|ANAPC10|UBA52|UBE2S	http://amigo.geneontology.org/amigo/term/GO:0007096
mitochondrion organization	Gene Ontology	GO:0007005	13	95	0.0101828	0.0569167	SIRT3|ESRRA|RAB29|PARK7|POLG2|PYROXD2|TAZ|MTFP1|SLC25A36|HTRA2|MTX1|SSBP1|SHARPIN	http://amigo.geneontology.org/amigo/term/GO:0007005
regulation of translation	Gene Ontology	GO:0006417	18	149	0.0103051	0.0570003	PKM|CYFIP1|RPS14|MRPS27|EIF4G1|CNOT10|MTG2|PAIP1|RPL13A|CNOT8|ATXN2|CNOT7|PYM1|TCOF1|UNK|DAPK3|NANOS3|RACK1	http://amigo.geneontology.org/amigo/term/GO:0006417
T cell proliferation	Gene Ontology	GO:0042098	5	21	0.0107997	0.0585088	RC3H1|CD151|CCND3|CTPS1|NCSTN	http://amigo.geneontology.org/amigo/term/GO:0042098
error-prone translesion synthesis	Gene Ontology	GO:0042276	5	21	0.0107997	0.0585088	MAD2L2|UBA52|PRIMPOL|RPA3|POLE2	http://amigo.geneontology.org/amigo/term/GO:0042276
positive regulation of lamellipodium assembly	Gene Ontology	GO:0010592	6	29	0.0109084	0.0585088	TWF2|CYFIP1|RAC1|ARPC2|DNM2|RAC2	http://amigo.geneontology.org/amigo/term/GO:0010592
protein glycosylation	Gene Ontology	GO:0006486	20	173	0.0113467	0.0602508	ST3GAL1|ALG9|GALNT7|TUSC3|POFUT2|POMGNT1|ST3GAL4|NAGPA|ALG5|MGAT1|MAN2A2|RPN2|ALG8|FKTN|B3GAT3|STT3A|POMT2|DAD1|CRPPA|FUT8	http://amigo.geneontology.org/amigo/term/GO:0006486
cellular response to growth factor stimulus	Gene Ontology	GO:0071363	10	66	0.0115641	0.060726	BMP4|TWF2|TGIF1|FYN|CIB1|DTYMK|HTRA2|SRD5A1|PPP2R5B|RACK1	http://amigo.geneontology.org/amigo/term/GO:0071363
regulation of RNA splicing	Gene Ontology	GO:0043484	8	47	0.0116649	0.060726	SNRNP70|FUS|AHNAK|PQBP1|HNRNPH1|MBNL1|CLK3|RBFOX2	http://amigo.geneontology.org/amigo/term/GO:0043484
antigen processing and presentation of exogenous peptide antigen via MHC class II	Gene Ontology	GO:0019886	13	97	0.0120403	0.0620721	CTSL|CD74|DYNLL1|AP1M2|SEC24B|RACGAP1|DYNC1I1|CLTC|DNM2|KLC1|AP1B1|SEC31A|HLA-DMA	http://amigo.geneontology.org/amigo/term/GO:0019886
positive regulation of GTPase activity	Gene Ontology	GO:0043547	34	341	0.0122555	0.0625739	MAP4K4|ITGA6|AGRN|EZH2|ARFGAP2|ARFGAP3|ARHGAP5|PIN1|TSC2|SNX13|RACGAP1|TBC1D1|S1PR1|OPHN1|ARHGAP23|ARHGAP22|ARHGAP27|EVI5|ARHGDIB|SIPA1L3|RASA3|ARHGEF11|RIC8A|AGAP3|DENND1A|RACK1|RGS10|GNAS|RIN3|STARD8|PICALM|ARHGAP11B|AGFG2|ASAP2	http://amigo.geneontology.org/amigo/term/GO:0043547
multivesicular body assembly	Gene Ontology	GO:0036258	6	30	0.012885	0.0627011	TSG101|VPS28|HGS|CHMP2B|CHMP3|CHMP5	http://amigo.geneontology.org/amigo/term/GO:0036258
interleukin-1-mediated signaling pathway	Gene Ontology	GO:0070498	13	98	0.0130621	0.0627011	MAP3K8|FBXW11|PELI3|BTRC|PSMD1|CHUK|PSME1|UBA52|NOD1|PSMA4|UBE2V1|PSMB5|IRAK1	http://amigo.geneontology.org/amigo/term/GO:0070498
release of cytochrome c from mitochondria	Gene Ontology	GO:0001836	5	22	0.0132251	0.0627011	TIMM50|BOK|FIS1|MFF|BAX	http://amigo.geneontology.org/amigo/term/GO:0001836
ribosomal small subunit biogenesis	Gene Ontology	GO:0042274	5	22	0.0132251	0.0627011	RPS19|RPS15|NPM1|ERCC2|EMG1	http://amigo.geneontology.org/amigo/term/GO:0042274
negative regulation of peptidyl-threonine phosphorylation	Gene Ontology	GO:0010801	5	22	0.0132251	0.0627011	SIRT2|EIF4G1|PARD3|CALM2|DMTN	http://amigo.geneontology.org/amigo/term/GO:0010801
regulation of neuron apoptotic process	Gene Ontology	GO:0043523	5	22	0.0132251	0.0627011	NSMF|PARK7|AKT1S1|SIGMAR1|BAX	http://amigo.geneontology.org/amigo/term/GO:0043523
negative regulation of mRNA splicing, via spliceosome	Gene Ontology	GO:0048025	5	22	0.0132251	0.0627011	HNRNPK|ACIN1|NPM1|HNRNPA2B1|RNPS1	http://amigo.geneontology.org/amigo/term/GO:0048025
nuclear-transcribed mRNA poly(A) tail shortening	Gene Ontology	GO:0000289	5	22	0.0132251	0.0627011	SAMD4B|CNOT7|CNOT8|CNOT10|MLH1	http://amigo.geneontology.org/amigo/term/GO:0000289
positive regulation of peptidyl-serine phosphorylation	Gene Ontology	GO:0033138	12	89	0.0148006	0.06933	MAD2L2|FNIP1|EIF4G1|CD44|PARK7|HSP90AB1|PFN2|MAPKAP1|CAPRIN2|PDCD10|PAK1|TRIM6	http://amigo.geneontology.org/amigo/term/GO:0033138
mitochondrial electron transport, NADH to ubiquinone	Gene Ontology	GO:0006120	8	49	0.0148844	0.06933	NDUFC1|NDUFA3|NDUFB6|NDUFS3|COQ9|NDUFA12|NDUFS8|NDUFS4	http://amigo.geneontology.org/amigo/term/GO:0006120
aerobic respiration	Gene Ontology	GO:0009060	6	31	0.0150993	0.0697195	SIRT3|MDH2|ME3|NDUFS8|UQCRB|MTFR1L	http://amigo.geneontology.org/amigo/term/GO:0009060
cellular response to reactive oxygen species	Gene Ontology	GO:0034614	7	40	0.0154095	0.0698721	MPV17|CHUK|PRDX5|AGAP3|PXN|MAPK8|PARK7	http://amigo.geneontology.org/amigo/term/GO:0034614
positive regulation of intrinsic apoptotic signaling pathway	Gene Ontology	GO:2001244	7	40	0.0154095	0.0698721	BCAP31|TAF6|FIS1|BAX|BOK|PRKRA|RACK1	http://amigo.geneontology.org/amigo/term/GO:2001244
proteasome-mediated ubiquitin-dependent protein catabolic process	Gene Ontology	GO:0043161	21	190	0.0155271	0.0698721	HUWE1|SIRT2|TRIM13|FBXW11|SKP2|UBE2A|PSMD1|IFI27|BTRC|CDC34|UBE2D3|PSME1|AGAP3|COP1|PSMB5|PSMA4|UBE2B|RNF4|ZSWIM8|ATXN3|SHARPIN	http://amigo.geneontology.org/amigo/term/GO:0043161
cellular response to interferon-beta	Gene Ontology	GO:0035458	5	23	0.0159926	0.0707671	IRF1|TRIM6|CDC34|HTRA2|AIM2	http://amigo.geneontology.org/amigo/term/GO:0035458
pyruvate metabolic process	Gene Ontology	GO:0006090	5	23	0.0159926	0.0707671	PCK2|PC|SLC16A3|HAGH|ME3	http://amigo.geneontology.org/amigo/term/GO:0006090
cytoplasmic microtubule organization	Gene Ontology	GO:0031122	8	50	0.0167158	0.0728639	STMN3|HOOK2|DST|CCDC88C|CHP1|FIGN|CIB1|TUBGCP4	http://amigo.geneontology.org/amigo/term/GO:0031122
protein autoubiquitination	Gene Ontology	GO:0051865	10	70	0.0171322	0.0728639	TRIM13|RNF10|LRSAM1|UBE2A|UBE2B|UBE2D3|RNF115|RNF220|RNF4|JADE2	http://amigo.geneontology.org/amigo/term/GO:0051865
regulation of inflammatory response	Gene Ontology	GO:0050727	12	91	0.0174338	0.0728639	IRF3|FOXP1|TLR4|PARK7|ABHD12|BRD4|TNIP1|BST1|FANCA|GRN|BAP1|SEMA7A	http://amigo.geneontology.org/amigo/term/GO:0050727
endosomal transport	Gene Ontology	GO:0016197	12	91	0.0174338	0.0728639	TSG101|BLOC1S2|DPY30|VPS28|REPS1|HGS|CHMP2B|UBA52|PICALM|ABCA1|CHMP3|CHMP5	http://amigo.geneontology.org/amigo/term/GO:0016197
neuron apoptotic process	Gene Ontology	GO:0051402	7	41	0.0175443	0.0728639	BAX|NCSTN|OXR1|BOK|PIGT|DIABLO|POLB	http://amigo.geneontology.org/amigo/term/GO:0051402
DNA replication initiation	Gene Ontology	GO:0006270	7	41	0.0175443	0.0728639	CDC34|NOC3L|ORC3|RPA3|POLE2|GMNN|MCM8	http://amigo.geneontology.org/amigo/term/GO:0006270
nucleotide metabolic process	Gene Ontology	GO:0009117	6	32	0.0175642	0.0728639	NME2|NME3|NT5C3B|ITPA|REXO2|NT5C2	http://amigo.geneontology.org/amigo/term/GO:0009117
intra-Golgi vesicle-mediated transport	Gene Ontology	GO:0006891	6	32	0.0175642	0.0728639	COPZ1|COPZ2|COPE|RAB6A|CUX1|GOSR2	http://amigo.geneontology.org/amigo/term/GO:0006891
intermediate filament cytoskeleton organization	Gene Ontology	GO:0045104	5	24	0.0191201	0.0775021	DST|MACF1|PLEC|ATXN3|CSNK1A1	http://amigo.geneontology.org/amigo/term/GO:0045104
steroid hormone mediated signaling pathway	Gene Ontology	GO:0043401	5	24	0.0191201	0.0775021	NR2C1|BMP4|ESRRA|RXRB|PPARA	http://amigo.geneontology.org/amigo/term/GO:0043401
blastocyst development	Gene Ontology	GO:0001824	5	24	0.0191201	0.0775021	SMARCB1|NASP|N4BP2L2|DAD1|EMG1	http://amigo.geneontology.org/amigo/term/GO:0001824
regulation of lipid metabolic process	Gene Ontology	GO:0019216	11	82	0.019816	0.0797145	PLPP1|EDF1|PSAP|PPARG|SREBF1|LSR|LSS|PPARA|FDFT1|NCOR2|NCOR1	http://amigo.geneontology.org/amigo/term/GO:0019216
regulation of small GTPase mediated signal transduction	Gene Ontology	GO:0051056	16	137	0.0201138	0.0801148	ARHGEF11|TRIO|RAC2|RAC1|RACGAP1|RHOQ|OPHN1|ARHGAP23|ARHGAP22|STARD8|ARHGDIB|ARHGAP11B|ARHGAP5|SIPA1L3|TSC2|RHOF	http://amigo.geneontology.org/amigo/term/GO:0051056
protein stabilization	Gene Ontology	GO:0050821	21	195	0.0202173	0.0801148	CD74|UBE2B|PRKRA|CTNND1|GLMP|TYROBP|PARK7|RPL5|CHP1|TCP1|HSP90AB1|GRN|PFN2|FLOT2|FLNA|PDCD10|TELO2|PIN1|MCM8|NPM1|HIP1R	http://amigo.geneontology.org/amigo/term/GO:0050821
regulation of macroautophagy	Gene Ontology	GO:0016241	10	72	0.0205619	0.0806495	ATP6V0B|PRKAG2|EXOC4|SNX5|ATP13A2|ATP6V1E1|PRKAA1|CAPN1|LAMTOR4|MAPK8	http://amigo.geneontology.org/amigo/term/GO:0016241
cellular response to oxidative stress	Gene Ontology	GO:0034599	13	104	0.020656	0.0806495	SIRT2|ATP2A2|NME2|VRK2|PARK7|ATP13A2|PRKAA1|FANCC|HTRA2|GPX8|PRKRA|PRDX5|PPIA	http://amigo.geneontology.org/amigo/term/GO:0034599
negative regulation of transcription, DNA-templated	Gene Ontology	GO:0045892	53	601	0.0222841	0.086276	FBXW11|TRIM6|HSF4|HDAC9|TLE1|ZNF219|DPF1|ZFP90|GMNN|CBX5|ELF2|NCOR2|NCOR1|EHMT1|SET|SIX4|CIITA|DNMT1|DEAF1|DNAJB6|CBFA2T2|NIPBL|YY1AP1|PHC2|NRG1|MBD1|CITED1|CNOT7|BCL7A|SIRT2|SUV39H2|HMGA2|IRF1|HMGA1|PPARG|NR2C1|BCOR|ING4|ENO1|ZNF639|BMP4|RBFOX2|CREBZF|QARS1|BTRC|ZKSCAN3|EZH2|FOXP1|VGLL4|SIX5|BAP1|GATAD2A|ATXN1	http://amigo.geneontology.org/amigo/term/GO:0045892
tRNA aminoacylation for protein translation	Gene Ontology	GO:0006418	7	43	0.022422	0.086276	SARS1|QARS1|WARS1|CARS2|DARS2|PPA2|TARS2	http://amigo.geneontology.org/amigo/term/GO:0006418
COPII vesicle coating	Gene Ontology	GO:0048208	9	63	0.0230767	0.0881562	SCFD1|TRAPPC1|TRAPPC5|PDCD6|PEF1|SEC24B|GOSR2|MCFD2|SEC31A	http://amigo.geneontology.org/amigo/term/GO:0048208
ATP-dependent chromatin remodeling	Gene Ontology	GO:0043044	6	34	0.0232923	0.0883444	SMARCB1|ERCC6|ACTL6A|MBD3|SMARCA1|HNRNPC	http://amigo.geneontology.org/amigo/term/GO:0043044
chromatin organization	Gene Ontology	GO:0006325	33	346	0.0241231	0.0908464	SMARCD1|HMGN1|HDAC9|PRKAA1|BRD4|EZH2|CBX7|SMARCA1|NCOR1|EHMT1|ASXL1|COPRS|DNMT1|DCAF1|BRPF3|ENY2|DOT1L|DAPK3|SMARCB1|DPY30|SUV39H2|HMGA2|PRMT7|BCOR|ING4|TLK2|UBE2A|SUPT4H1|BABAM1|ACTL6A|BAP1|NSD2|PHF1	http://amigo.geneontology.org/amigo/term/GO:0006325
negative regulation of protein kinase B signaling	Gene Ontology	GO:0051898	9	64	0.0253218	0.0940821	CAVIN3|DLG1|CIB1|DAG1|PPARA|PDCD6|TSC2|PPP2R5B|RACK1	http://amigo.geneontology.org/amigo/term/GO:0051898
Rho protein signal transduction	Gene Ontology	GO:0007266	8	54	0.0256736	0.0940821	ARHGEF11|CTNNAL1|CNKSR1|CHUK|RTKN|ARHGDIB|ARHGAP5|EPS8L2	http://amigo.geneontology.org/amigo/term/GO:0007266
positive regulation of protein-containing complex assembly	Gene Ontology	GO:0031334	8	54	0.0256736	0.0940821	FNIP1|SPIDR|PARK7|BAX|WARS1|NRG1|PPP2R5B|RACK1	http://amigo.geneontology.org/amigo/term/GO:0031334
regulation of catalytic activity	Gene Ontology	GO:0050790	27	273	0.0258936	0.0940821	RANGRF|DYNLL1|PRKAG2|EIF2B2|TRIO|SERGEF|EPS8L2|PPP1R7|CCDC88C|ARHGDIB|CAPN1|CCZ1|ARHGEF11|RIC8A|PSMD1|CTSB|MADD|DENND1A|NUCB2|SIL1|PLEKHG4|EEF1D|RIN3|ARHGEF28|LAMTOR4|KIAA1217|PPP2R5B	http://amigo.geneontology.org/amigo/term/GO:0050790
global genome nucleotide-excision repair	Gene Ontology	GO:0070911	5	26	0.0265177	0.0940821	ERCC1|UBA52|CHD1L|ERCC2|RNF111	http://amigo.geneontology.org/amigo/term/GO:0070911
maturation of SSU-rRNA from tricistronic rRNA transcript (SSU-rRNA, 5.8S rRNA, LSU-rRNA)	Gene Ontology	GO:0000462	5	26	0.0265177	0.0940821	RPS19|MRPS11|FAM207A|ERCC2|RPS14	http://amigo.geneontology.org/amigo/term/GO:0000462
heme biosynthetic process	Gene Ontology	GO:0006783	5	26	0.0265177	0.0940821	PPOX|ABCG2|ATP5IF1|TMEM14C|UROS	http://amigo.geneontology.org/amigo/term/GO:0006783
positive regulation of intracellular protein transport	Gene Ontology	GO:0090316	5	26	0.0265177	0.0940821	B3GAT3|RAB29|ASPH|PDCD10|OAZ1	http://amigo.geneontology.org/amigo/term/GO:0090316
actin filament polymerization	Gene Ontology	GO:0030041	6	35	0.0265769	0.0940821	ARPC4-TTLL3|RAC1|ARPC2|SPIRE1|MSRB2|GSN	http://amigo.geneontology.org/amigo/term/GO:0030041
methylation	Gene Ontology	GO:0032259	21	201	0.0272167	0.0952308	EHMT1|METTL8|NSD2|TRMU|DPH5|TRMT1|MRM2|DNMT1|TRMT61A|METTL5|PRMT7|TARBP1|PRDM4|METTL23|NDUFAF7|EZH2|EMG1|TRMT2B|DOT1L|SHMT2|SUV39H2	http://amigo.geneontology.org/amigo/term/GO:0032259
intracellular receptor signaling pathway	Gene Ontology	GO:0030522	11	86	0.02726	0.0952308	NR2C1|ESRRA|PPARA|RXRB|PDCD6-AHRR|PPARG|SREBF1|PLTP|ABCA1|NCOR2|NCOR1	http://amigo.geneontology.org/amigo/term/GO:0030522
cell-matrix adhesion	Gene Ontology	GO:0007160	12	97	0.0274483	0.0952616	ITGB2|ITGB5|PPFIA1|CD44|RAC1|VCL|THBS3|PXN|ADAM15|CD63|ITGB1BP1|COL17A1	http://amigo.geneontology.org/amigo/term/GO:0007160
regulation of protein phosphorylation	Gene Ontology	GO:0001932	9	65	0.0277174	0.0955711	PLXNB2|FNIP1|STAT2|TADA2A|CCDC88C|EZH2|NDUFS4|PIN1|PPP2R5B	http://amigo.geneontology.org/amigo/term/GO:0001932
endocytosis	Gene Ontology	GO:0006897	24	240	0.0305384	0.102263	SNX5|DNM2|APLP1|TSC2|DENND1A|BIN3|HIP1R|BIN1|REPS1|OPHN1|RUFY1|ARHGAP27|CLN3|SH3KBP1|RAB17|HOOK2|HEATR5A|RHOQ|MARCHF2|LRP6|MICALL1|MYO6|RIN3|PICALM	http://amigo.geneontology.org/amigo/term/GO:0006897
blastocyst hatching	Gene Ontology	GO:0001835	5	27	0.0308138	0.102263	UBE2A|SMARCB1|CCDC24|STMN3|BCOR	http://amigo.geneontology.org/amigo/term/GO:0001835
regulation of Rho protein signal transduction	Gene Ontology	GO:0035023	5	27	0.0308138	0.102263	ARHGEF28|EPS8L2|ARHGDIB|OPHN1|STARD8	http://amigo.geneontology.org/amigo/term/GO:0035023
response to gamma radiation	Gene Ontology	GO:0010332	5	27	0.0308138	0.102263	TRIM13|POLB|BAX|PRKAA1|ERCC6	http://amigo.geneontology.org/amigo/term/GO:0010332
branching morphogenesis of an epithelial tube	Gene Ontology	GO:0048754	5	27	0.0308138	0.102263	MKS1|MET|BMP4|PAK1|PPP1CA	http://amigo.geneontology.org/amigo/term/GO:0048754
positive regulation of G2/M transition of mitotic cell cycle	Gene Ontology	GO:0010971	5	27	0.0308138	0.102263	BRD4|CCNB1|RAD51C|RAD51B|DBF4B	http://amigo.geneontology.org/amigo/term/GO:0010971
type I interferon signaling pathway	Gene Ontology	GO:0060337	9	67	0.0329776	0.108765	IRF3|IRF2|IRF1|STAT2|IRF9|IP6K2|BST2|IRAK1|IFI27	http://amigo.geneontology.org/amigo/term/GO:0060337
tRNA methylation	Gene Ontology	GO:0030488	6	37	0.0340328	0.111552	METTL8|TRMT2B|TRMT61A|MTO1|TARBP1|TRMT1	http://amigo.geneontology.org/amigo/term/GO:0030488
aggrephagy	Gene Ontology	GO:0035973	5	28	0.035522	0.114316	DYNC1I1|UBE2V1|UBA52|DYNLL1|PARK7	http://amigo.geneontology.org/amigo/term/GO:0035973
nucleocytoplasmic transport	Gene Ontology	GO:0006913	5	28	0.035522	0.114316	UPF3A|CITED1|NPM1|NUP85|EIF5A	http://amigo.geneontology.org/amigo/term/GO:0006913
negative regulation of TOR signaling	Gene Ontology	GO:0032007	5	28	0.035522	0.114316	PDCD6|FNIP1|AKT1S1|TSC2|PRKAA1	http://amigo.geneontology.org/amigo/term/GO:0032007
mRNA export from nucleus	Gene Ontology	GO:0006406	12	101	0.0361108	0.114819	NUP50|RNPS1|SRSF3|HNRNPA2B1|SYMPK|NUP85|SRSF11|CPSF1|ENY2|CPSF4|THOC5|EIF5A	http://amigo.geneontology.org/amigo/term/GO:0006406
DNA recombination	Gene Ontology	GO:0006310	12	101	0.0361108	0.114819	SPIDR|NSMCE4A|ERCC1|TFPT|RPA3|RAD51AP1|IGHMBP2|ACTL6A|RPAIN|RAD51C|RAD51B|NSMCE1	http://amigo.geneontology.org/amigo/term/GO:0006310
mRNA 3'-end processing	Gene Ontology	GO:0031124	8	58	0.037528	0.118615	RNPS1|SRSF3|SYMPK|SRSF11|CPSF1|CPSF4|PAPOLA|THOC5	http://amigo.geneontology.org/amigo/term/GO:0031124
nucleotide-excision repair, DNA incision	Gene Ontology	GO:0033683	6	38	0.0382194	0.118914	CHD1L|ERCC1|ERCC2|RPA3|UBA52|OGG1	http://amigo.geneontology.org/amigo/term/GO:0033683
regulation of actin filament polymerization	Gene Ontology	GO:0030833	6	38	0.0382194	0.118914	ARPC4-TTLL3|CYFIP1|ARPC2|ARPC5L|PFN2|ARPC1B	http://amigo.geneontology.org/amigo/term/GO:0030833
regulation of phosphoprotein phosphatase activity	Gene Ontology	GO:0043666	7	48	0.0385183	0.118914	PPP1R7|SET|PPP2R2D|PPP4R2|PTPA|TIPRL|PPP2R5B	http://amigo.geneontology.org/amigo/term/GO:0043666
cellular response to heat	Gene Ontology	GO:0034605	7	48	0.0385183	0.118914	ATP2A2|HSP90AB1|STAC|PDCD6|IRAK1|ATXN3|HTRA2	http://amigo.geneontology.org/amigo/term/GO:0034605
activation of cysteine-type endopeptidase activity involved in apoptotic process	Gene Ontology	GO:0006919	11	91	0.0391591	0.120193	CTSH|PPARG|BAX|CFLAR|BOK|NOD1|DIABLO|PDCD6|HIP1R|CRADD|RACK1	http://amigo.geneontology.org/amigo/term/GO:0006919
aging	Gene Ontology	GO:0007568	19	185	0.0399242	0.121838	SIRT3|RPN2|ITGB2|AURKB|CNP|CIITA|ERCC2|LITAF|SRR|HTRA2|SREBF1|MBD1|POLB|MBD3|UCP2|IRAK1|DAG1|OGG1|GSN	http://amigo.geneontology.org/amigo/term/GO:0007568
regulation of alternative mRNA splicing, via spliceosome	Gene Ontology	GO:0000381	8	59	0.0409826	0.123999	RBM4|RNPS1|HNRNPA1|KHDRBS3|DDX5|PUF60|MBNL1|RBFOX2	http://amigo.geneontology.org/amigo/term/GO:0000381
chromatin remodeling	Gene Ontology	GO:0006338	12	103	0.0410994	0.123999	MPND|ZNHIT1|SMARCB1|CHD1L|TADA2A|SUV39H2|ACTL6A|SMARCD1|BRD4|SMARCA1|NPM1|PAK1	http://amigo.geneontology.org/amigo/term/GO:0006338
regulation of cell shape	Gene Ontology	GO:0008360	16	150	0.0420139	0.125672	PLXNB2|DLG1|RHOF|ITGB2|RAC2|RAC1|RHOQ|CYFIP1|FYN|RDX|DMTN|CFDP1|BAIAP2|DAPK3|SH3KBP1|FAM171A1	http://amigo.geneontology.org/amigo/term/GO:0008360
positive regulation of NF-kappaB transcription factor activity	Gene Ontology	GO:0051092	17	162	0.0421273	0.125672	TRIM13|ITGB2|TLR4|CFLAR|TRIM5|CHUK|AIM2|TRIM8|UBA52|CIB1|NOD1|FLOT2|UBE2V1|IRAK1|NPM1|PPIA|TRIM6	http://amigo.geneontology.org/amigo/term/GO:0051092
actin filament organization	Gene Ontology	GO:0007015	15	139	0.0439508	0.130379	MAD2L2|DLG1|SORBS2|RAC2|RAC1|TPM4|MYO1C|MYO6|SH3KBP1|CORO1B|CFL2|HIP1R|RHOF|BIN3|KPTN	http://amigo.geneontology.org/amigo/term/GO:0007015
cortical actin cytoskeleton organization	Gene Ontology	GO:0030866	5	30	0.0462028	0.132614	DLG1|FHOD1|RHOQ|EPB41L2|CAVIN3	http://amigo.geneontology.org/amigo/term/GO:0030866
translational elongation	Gene Ontology	GO:0006414	5	30	0.0462028	0.132614	TSFM|EEF1A1|EEF1D|ELOF1|EIF5A	http://amigo.geneontology.org/amigo/term/GO:0006414
regulation of translational initiation	Gene Ontology	GO:0006446	5	30	0.0462028	0.132614	EIF4G1|EIF2B2|MTIF2|PAIP1|EIF4A2	http://amigo.geneontology.org/amigo/term/GO:0006446
TRIF-dependent toll-like receptor signaling pathway	Gene Ontology	GO:0035666	5	30	0.0462028	0.132614	IRF3|UBA52|UBE2D3|TLR4|CHUK	http://amigo.geneontology.org/amigo/term/GO:0035666
ribosomal large subunit biogenesis	Gene Ontology	GO:0042273	5	30	0.0462028	0.132614	NIP7|RPL5|NPM1|RPL35A|EIF6	http://amigo.geneontology.org/amigo/term/GO:0042273
positive regulation of cyclin-dependent protein serine/threonine kinase activity	Gene Ontology	GO:0045737	5	30	0.0462028	0.132614	CCND3|CCNB1|CDK5RAP1|PSRC1|CCNY	http://amigo.geneontology.org/amigo/term/GO:0045737
cognition	Gene Ontology	GO:0050890	7	50	0.0466478	0.133172	METTL23|CYFIP1|TUSC3|GNAS|CHMP2B|NIPBL|ST3GAL4	http://amigo.geneontology.org/amigo/term/GO:0050890
nucleotide-excision repair	Gene Ontology	GO:0006289	6	40	0.0475395	0.134345	ERCC1|ERCC2|RPA3|FANCC|ATXN3|OGG1	http://amigo.geneontology.org/amigo/term/GO:0006289
response to virus	Gene Ontology	GO:0009615	13	117	0.0477228	0.134345	CREBZF|IFI44|CCDC130|TPT1|BANF1|HYAL3|HMGA2|CHUK|HMGA1|ENO1|FOSL1|BST2|PRKRA	http://amigo.geneontology.org/amigo/term/GO:0009615
chromosome segregation	Gene Ontology	GO:0007059	11	94	0.0478177	0.134345	NSL1|NEK6|TLK2|ERCC2|STAG1|BANF1|SKA3|DLGAP5|NDE1|SGO1|TOP3B	http://amigo.geneontology.org/amigo/term/GO:0007059
neural tube closure	Gene Ontology	GO:0001843	10	83	0.0487149	0.136145	PLXNB2|MKS1|BMP4|LRP6|SUFU|DEAF1|SCRIB|CC2D2A|SEC24B|TSC2	http://amigo.geneontology.org/amigo/term/GO:0001843
mitotic nuclear envelope reassembly	Gene Ontology	GO:0007084	7	51	0.0510934	0.142045	SIRT2|CCNB1|AHCTF1|NUP85|CHMP2B|BANF1|CHMP3	http://amigo.geneontology.org/amigo/term/GO:0007084
sterol biosynthetic process	Gene Ontology	GO:0016126	5	31	0.0521842	0.142724	FDFT1|PRKAG2|EBP|CYB5R2|PRKAA1	http://amigo.geneontology.org/amigo/term/GO:0016126
cristae formation	Gene Ontology	GO:0042407	5	31	0.0521842	0.142724	ATP5MC1|ATP5MF|ATP5PF|CHCHD6|TAZ	http://amigo.geneontology.org/amigo/term/GO:0042407
termination of RNA polymerase I transcription	Gene Ontology	GO:0006363	5	31	0.0521842	0.142724	ERCC2|TTF1|POLR1G|POLR2H|TAF1D	http://amigo.geneontology.org/amigo/term/GO:0006363
positive regulation of cell cycle	Gene Ontology	GO:0045787	6	41	0.0526815	0.142724	CCNB1|LRP6|TCF3|PTK6|FOSL1|CHEK1	http://amigo.geneontology.org/amigo/term/GO:0045787
carbohydrate transport	Gene Ontology	GO:0008643	6	41	0.0526815	0.142724	SLC37A2|SLC2A8|SLC35B1|MFSD12|RFT1|SLC50A1	http://amigo.geneontology.org/amigo/term/GO:0008643
protein localization to plasma membrane	Gene Ontology	GO:0072659	16	155	0.0538348	0.145108	DLG1|ANXA2|LRP6|TTC7A|SCP2|RAMP1|RDX|TTC8|SLMAP|ANK1|CLN3|TTC7B|FLOT2|MYADM|FLNA|ITGB1BP1	http://amigo.geneontology.org/amigo/term/GO:0072659
positive regulation of cell migration	Gene Ontology	GO:0030335	24	255	0.0551829	0.147991	MAP4K4|MYO1C|ITGA6|CD151|MYADM|PDCD10|S1PR1|CIB1|DAPK3|CTSH|PDGFC|SPAG9|RDX|TJP1|NUMB|GRN|SYNE2|SEMA7A|RACK1|BMP4|CSF1|TRIP6|ELP6|PAK1	http://amigo.geneontology.org/amigo/term/GO:0030335
regulation of cell growth	Gene Ontology	GO:0001558	9	74	0.056705	0.150268	TSG101|ARHGEF11|MAD2L2|CDK11A|CDK11B|TMEM97|CEACAM1|BAP1|NPM1	http://amigo.geneontology.org/amigo/term/GO:0001558
amino acid transport	Gene Ontology	GO:0006865	8	63	0.0568812	0.150268	SFXN5|SLC7A6|SLC3A2|SFXN4|MFSD12|CLN3|SFXN2|SLC25A29	http://amigo.geneontology.org/amigo/term/GO:0006865
RNA phosphodiester bond hydrolysis, endonucleolytic	Gene Ontology	GO:0090502	8	63	0.0568812	0.150268	INTS11|POP5|POP4|TSEN2|SND1|NUDT16L1|RNASEK|ENDOV	http://amigo.geneontology.org/amigo/term/GO:0090502
vesicle docking involved in exocytosis	Gene Ontology	GO:0006904	5	32	0.0585953	0.15252	SCFD1|STXBP2|EXOC4|YKT6|RABEPK	http://amigo.geneontology.org/amigo/term/GO:0006904
intracellular transport	Gene Ontology	GO:0046907	5	32	0.0585953	0.15252	TMEM167A|NUP50|SPIRE1|AFTPH|GNAS	http://amigo.geneontology.org/amigo/term/GO:0046907
GPI anchor biosynthetic process	Gene Ontology	GO:0006506	5	32	0.0585953	0.15252	PIGP|PIGQ|PGAP2|PIGT|PIGG	http://amigo.geneontology.org/amigo/term/GO:0006506
protein localization	Gene Ontology	GO:0008104	15	145	0.0595697	0.1543	NEDD8|DLG1|PARD3|CCDC120|HEATR5A|MPV17|DDX42|SCP2|UBE2D3|SCRIB|ECI2|UBA52|NPM1|TSC2|BIN3	http://amigo.geneontology.org/amigo/term/GO:0008104
protein ubiquitination	Gene Ontology	GO:0016567	51	614	0.0605369	0.156044	RNF115|TRIM13|BTRC|DTX2|DTX3|CDC34|KCTD9|HUWE1|UBE2D3|RC3H1|FBXW11|JADE2|DCAF1|NEDD8|SKP2|PELI3|ANAPC11|ANAPC10|MED24|COP1|WSB1|RNF111|PDCD6|ZSWIM8|PEF1|ARIH2|LRSAM1|OTULIN|H2BC11|UBE2E1|UBE2E2|RNF220|KLHL2|HERC4|UBE2M|MARCHF2|H2BC15|UBE2S|RACK1|RNF167|UBE2A|UBE2B|FBXL5|FBXL6|TRIM8|UBA52|NSMCE1|RNF4|DCAF8|TRIM5|TRIM6	http://amigo.geneontology.org/amigo/term/GO:0016567
autophagy	Gene Ontology	GO:0006914	18	183	0.0628923	0.161332	SIRT2|OPTN|SUPT20H|LRSAM1|ATG12|PARK7|ATP13A2|USP10|PRKAA1|RGS19|CHMP2B|GPR137|ZKSCAN3|CLTC|TEX264|TMBIM6|GRAMD1A|TRIM5	http://amigo.geneontology.org/amigo/term/GO:0006914
exonucleolytic catabolism of deadenylated mRNA	Gene Ontology	GO:0043928	5	33	0.0654353	0.161785	EXOSC3|EXOSC8|CNOT8|CNOT7|NT5C3B	http://amigo.geneontology.org/amigo/term/GO:0043928
establishment of cell polarity	Gene Ontology	GO:0030010	5	33	0.0654353	0.161785	HSP90AB1|ARHGEF11|PARD3|UST|PAK1	http://amigo.geneontology.org/amigo/term/GO:0030010
positive regulation of DNA binding	Gene Ontology	GO:0043388	5	33	0.0654353	0.161785	EDF1|PPARG|ERCC2|CALM2|SIRT2	http://amigo.geneontology.org/amigo/term/GO:0043388
regulation of canonical Wnt signaling pathway	Gene Ontology	GO:0060828	5	33	0.0654353	0.161785	MKS1|OTULIN|BTRC|CCNY|PPP1CA	http://amigo.geneontology.org/amigo/term/GO:0060828
positive regulation of gene expression, epigenetic	Gene Ontology	GO:0045815	5	33	0.0654353	0.161785	TAF1D|MYO1C|POLR2H|ERCC6|POLR1G	http://amigo.geneontology.org/amigo/term/GO:0045815
RNA phosphodiester bond hydrolysis, exonucleolytic	Gene Ontology	GO:0090503	5	33	0.0654353	0.161785	REXO2|TOE1|CNOT8|CNOT7|USB1	http://amigo.geneontology.org/amigo/term/GO:0090503
protein dephosphorylation	Gene Ontology	GO:0006470	18	184	0.0655804	0.161785	DLG1|CTDSPL|FBXW11|PPM1A|PPP1CA|BTRC|PPM1K|PPP4R2|CTDP1|SBF1|PDP1|PPA2|DUSP14|TIMM50|PPP3CC|PTPRF|CTDSP1|PPP2R5B	http://amigo.geneontology.org/amigo/term/GO:0006470
interstrand cross-link repair	Gene Ontology	GO:0036297	7	54	0.0659868	0.161785	ERCC1|RPA3|RAD51AP1|UBA52|FANCC|FANCA|FANCI	http://amigo.geneontology.org/amigo/term/GO:0036297
positive regulation of stress fiber assembly	Gene Ontology	GO:0051496	7	54	0.0659868	0.161785	FHOD1|RAC1|LIMCH1|PFN2|PXN|ITGB1BP1|PAK1	http://amigo.geneontology.org/amigo/term/GO:0051496
pre-replicative complex assembly	Gene Ontology	GO:0036388	8	65	0.0661156	0.161785	PSMD1|ORC3|PSME1|UBA52|PSMA4|GMNN|PSMB5|MCM8	http://amigo.geneontology.org/amigo/term/GO:0036388
activation of protein kinase activity	Gene Ontology	GO:0032147	8	66	0.0710601	0.173087	DLG1|MAP4K4|PRKAG2|DBF4B|GPRC5A|PAK1|BORA|TAOK3	http://amigo.geneontology.org/amigo/term/GO:0032147
receptor internalization	Gene Ontology	GO:0031623	6	45	0.0765082	0.185506	ITGB2|GRK4|RAMP1|CLTC|DNM2|PICALM	http://amigo.geneontology.org/amigo/term/GO:0031623
positive regulation of type I interferon production	Gene Ontology	GO:0032481	7	56	0.0772263	0.186396	IRF3|STAT6|IRF1|PQBP1|G3BP1|IRAK1|POLR2H	http://amigo.geneontology.org/amigo/term/GO:0032481
positive regulation of axon extension	Gene Ontology	GO:0045773	5	35	0.0803888	0.193151	SEMA7A|TWF2|CYFIP1|PAK1|MACF1	http://amigo.geneontology.org/amigo/term/GO:0045773
response to drug	Gene Ontology	GO:0042493	27	306	0.0828085	0.196711	RPN2|PRKAA1|PPOX|MGST1|DAD1|OGG1|CTPS1|PLIN2|FYN|HSP90AB1|PPAT|FOSL1|SRD5A1|CHUK|SRR|PPARG|TXN2|CCNB1|TJP1|UBE2B|MYO6|TERF1|MBD1|AGPAT2|ABCA1|SREBF1|TGIF1	http://amigo.geneontology.org/amigo/term/GO:0042493
DNA damage response, signal transduction by p53 class mediator resulting in cell cycle arrest	Gene Ontology	GO:0006977	7	57	0.0832396	0.196711	CCNB1|CNOT10|BAX|CNOT8|AURKA|CNOT7|CRADD	http://amigo.geneontology.org/amigo/term/GO:0006977
intrinsic apoptotic signaling pathway in response to DNA damage	Gene Ontology	GO:0008630	6	46	0.0832779	0.196711	MLH1|ERCC6|BOK|POLB|BAX|HTRA2	http://amigo.geneontology.org/amigo/term/GO:0008630
metabolic process	Gene Ontology	GO:0008152	18	190	0.0833522	0.196711	MTHFD2L|PAK1|MTHFD2|IDUA|HYAL3|NAGLU|MAN2A2|PFKP|SRR|PC|PPAT|GFUS|RRM1|GUSB|FDFT1|NT5C2|OGG1|PKM	http://amigo.geneontology.org/amigo/term/GO:0008152
cilium assembly	Gene Ontology	GO:0060271	21	229	0.0854741	0.200826	CEP164|RO60|DYNLL1|EXOC4|CFAP298|CCDC57|TCTN3|WDR90|TTC8|AHI1|MKS1|CC2D2A|ABLIM1|B9D1|PDE6D|SEPTIN7|FLNA|GSN|ATAT1|RAB17|CEP20	http://amigo.geneontology.org/amigo/term/GO:0060271
forebrain development	Gene Ontology	GO:0030900	8	69	0.0872091	0.201669	BMP4|CNP|TYROBP|FYN|NUMB|NDE1|APLP1|HTRA2	http://amigo.geneontology.org/amigo/term/GO:0030900
snRNA transcription by RNA polymerase II	Gene Ontology	GO:0042795	8	69	0.0872091	0.201669	TAF6|INTS11|INTS12|SRRT|GTF2B|GTF2A2|POU2F2|POLR2H	http://amigo.geneontology.org/amigo/term/GO:0042795
interferon-gamma-mediated signaling pathway	Gene Ontology	GO:0060333	8	69	0.0872091	0.201669	IRF3|IRF2|IRF1|CD44|IRF9|TRIM8|CIITA|TRIM5	http://amigo.geneontology.org/amigo/term/GO:0060333
negative regulation of transcription by RNA polymerase II	Gene Ontology	GO:0000122	69	880	0.0878818	0.201669	TSG101|MAD2L2|SARS1|HSF4|FOXP4|RPS14|HDAC9|ZNF75A|IFI27|PPARA|ZNF219|UBE2D3|SIRT2|EZH2|ZFP90|CBX7|CBX5|TCF25|NCOR2|NCOR1|EHMT1|FNIP1|PPM1A|CIITA|DNMT1|DEAF1|UBA52|CBFA2T2|ZNF266|SREBF1|HNRNPA2B1|AURKB|SUPT4H1|HDGF|PAWR|DLG1|TRIM29|TCF3|IRF2|CUX1|SUV39H2|HMGA2|STAT6|NIPBL|PPARG|BMP4|SPDEF|ZKSCAN3|BCOR|SUFU|LARP7|IRF3|THAP1|NR2C1|NSD2|MZF1|ENO1|CCND3|PKIG|ZNF846|DDX5|DCAF1|N4BP2L2|FOXP1|MBD3|CTNNBI…	http://amigo.geneontology.org/amigo/term/GO:0000122
activation of protein kinase B activity	Gene Ontology	GO:0032148	5	36	0.0884911	0.201669	NRG1|MAPKAP1|PARK7|ITGB1BP1|PPIA	http://amigo.geneontology.org/amigo/term/GO:0032148
transferrin transport	Gene Ontology	GO:0033572	5	36	0.0884911	0.201669	ATP6V0B|ATP6V1E1|MCOLN1|CLTC|DNM2	http://amigo.geneontology.org/amigo/term/GO:0033572
semaphorin-plexin signaling pathway	Gene Ontology	GO:0071526	5	36	0.0884911	0.201669	PLXNB2|MET|RAC1|SEMA7A|FLNA	http://amigo.geneontology.org/amigo/term/GO:0071526
positive regulation of translation	Gene Ontology	GO:0045727	9	81	0.0893521	0.202761	PLXNB2|CIRBP|RPL5|METTL5|PAIP1|UPF3A|EIF6|PYM1|NPM1	http://amigo.geneontology.org/amigo/term/GO:0045727
cell migration	Gene Ontology	GO:0016477	23	257	0.0916514	0.207093	PTK6|CORO1B|CD151|NDE1|ITGB5|LAMB3|ITGB1BP1|MET|S1PR1|CEACAM1|CLN3|NRG1|SH3KBP1|ITGB2|CD63|CD44|RHOQ|RHOF|ARPC5L|SCRIB|PTPRF|PAK1|FUT8	http://amigo.geneontology.org/amigo/term/GO:0016477
regulation of mRNA stability	Gene Ontology	GO:0043488	12	118	0.0941211	0.211773	YWHAZ|SET|EIF4G1|PSMD1|UBA52|PSME1|RC3H1|EXOSC8|PSMA4|EXOSC3|PSMB5|SAMD4B	http://amigo.geneontology.org/amigo/term/GO:0043488
cation transmembrane transport	Gene Ontology	GO:0098655	9	82	0.0947662	0.211961	SLC41A3|ATP13A2|NALCN|CALHM2|CNGA1|MCOLN1|TRPM4|P2RX5|P2RX6	http://amigo.geneontology.org/amigo/term/GO:0098655
mRNA transport	Gene Ontology	GO:0051028	11	106	0.095003	0.211961	NUP50|SRSF3|AHCTF1|HNRNPA1|MYO1C|NUP85|UPF3A|HNRNPA2B1|ENY2|THOC5|EIF5A	http://amigo.geneontology.org/amigo/term/GO:0051028
mitochondrial translation	Gene Ontology	GO:0032543	5	37	0.0970002	0.213093	MRPL43|MRPS6|MRPS11|MRPL52|MRPL51	http://amigo.geneontology.org/amigo/term/GO:0032543
nucleotide-excision repair, DNA incision, 5'-to lesion	Gene Ontology	GO:0006296	5	37	0.0970002	0.213093	ERCC1|UBA52|CHD1L|ERCC2|RPA3	http://amigo.geneontology.org/amigo/term/GO:0006296
membrane organization	Gene Ontology	GO:0061024	13	131	0.0971157	0.213093	SLC2A8|ARPC2|REPS1|HGS|UBA52|CLN3|CLTC|DNM2|CHP1|BIN1|SH3KBP1|PICALM|HIP1R	http://amigo.geneontology.org/amigo/term/GO:0061024
nucleic acid phosphodiester bond hydrolysis	Gene Ontology	GO:0090305	13	131	0.0971157	0.213093	USB1|ERCC1|TSEN15|PLD3|REXO2|CNOT8|G3BP1|TSEN2|SND1|EXD3|RNASEK|CNOT7|ENDOV	http://amigo.geneontology.org/amigo/term/GO:0090305
cellular response to glucose starvation	Gene Ontology	GO:0042149	6	48	0.0977755	0.213657	UPP1|HNRNPA1|PRKAG2|PRKAA1|TBL2|KPTN	http://amigo.geneontology.org/amigo/term/GO:0042149
ciliary basal body-plasma membrane docking	Gene Ontology	GO:0097711	10	95	0.100516	0.218745	CEP164|DYNLL1|CEP63|TCTN3|AHI1|MKS1|CC2D2A|NPHP4|NDE1|B9D1	http://amigo.geneontology.org/amigo/term/GO:0097711
response to oxidative stress	Gene Ontology	GO:0006979	13	132	0.101526	0.220041	ERCC1|PRDX5|MAPK8|ERCC6|MSRB2|TXN2|OXR1|NDUFA12|NDUFS8|GPX8|PSMB5|ERCC2|OGG1	http://amigo.geneontology.org/amigo/term/GO:0006979
positive regulation of protein binding	Gene Ontology	GO:0032092	8	72	0.10532	0.221919	BMP4|NMD3|RAMP1|HSP90AB1|CAPRIN2|MARK3|PIN1|HIP1R	http://amigo.geneontology.org/amigo/term/GO:0032092
transcription-coupled nucleotide-excision repair	Gene Ontology	GO:0006283	8	72	0.10532	0.221919	HMGN1|ERCC1|ERCC2|ERCC6|UBA52|RPA3|COPS7B|POLR2H	http://amigo.geneontology.org/amigo/term/GO:0006283
positive regulation of fibroblast proliferation	Gene Ontology	GO:0048146	6	49	0.105494	0.221919	CD74|CCNB1|PDGFC|ANXA2|NDUFS4|FBLN1	http://amigo.geneontology.org/amigo/term/GO:0048146
erythrocyte differentiation	Gene Ontology	GO:0030218	6	49	0.105494	0.221919	BMP4|TMEM14C|RPS14|RPS19|ACIN1|ATP5IF1	http://amigo.geneontology.org/amigo/term/GO:0030218
macroautophagy	Gene Ontology	GO:0016236	10	96	0.105894	0.221919	TSG101|DYNLL1|VPS28|PRKAG2|HGS|PRKAA1|CHMP2B|ATG12|CLN3|CHMP3	http://amigo.geneontology.org/amigo/term/GO:0016236
dendrite morphogenesis	Gene Ontology	GO:0048813	5	38	0.105906	0.221919	ABI1|FYN|RBFOX2|PICALM|DTNBP1	http://amigo.geneontology.org/amigo/term/GO:0048813
DNA damage response, detection of DNA damage	Gene Ontology	GO:0042769	5	38	0.105906	0.221919	UBA52|UBE2B|HMGA2|RPA3|MRPS11	http://amigo.geneontology.org/amigo/term/GO:0042769
negative regulation of extrinsic apoptotic signaling pathway	Gene Ontology	GO:2001237	5	38	0.105906	0.221919	CFLAR|PARK7|BMP4|PELI3|ITGA6	http://amigo.geneontology.org/amigo/term/GO:2001237
regulation of protein stability	Gene Ontology	GO:0031647	9	84	0.106154	0.221919	DAD1|TMEM25|SREBF1|LSS|CTSA|TADA2A|PIN1|NPM1|AURKA	http://amigo.geneontology.org/amigo/term/GO:0031647
negative regulation of neuron apoptotic process	Gene Ontology	GO:0043524	14	146	0.108054	0.225007	SET|VSTM2L|SIX4|DNAJC5|PARK7|FYN|BAX|HSP90AB1|OXR1|BOK|CLN3|GRN|PIN1|CITED1	http://amigo.geneontology.org/amigo/term/GO:0043524
response to calcium ion	Gene Ontology	GO:0051592	7	61	0.109878	0.227912	ENTPD6|CALM2|ANXA11|PEF1|PDCD6|SEC31A|S100A16	http://amigo.geneontology.org/amigo/term/GO:0051592
retrograde vesicle-mediated transport, Golgi to endoplasmic reticulum	Gene Ontology	GO:0006890	9	85	0.112124	0.231665	COPZ1|SCFD1|COPZ2|COPE|RACGAP1|RAB6A|ARFGAP2|ARFGAP3|KLC1	http://amigo.geneontology.org/amigo/term/GO:0006890
intracellular transport of virus	Gene Ontology	GO:0075733	6	50	0.113519	0.233638	TSG101|NUP50|VPS28|NUP85|UBA52|NMT2	http://amigo.geneontology.org/amigo/term/GO:0075733
cholesterol biosynthetic process	Gene Ontology	GO:0006695	5	39	0.115199	0.235271	EBP|ACAT2|FDFT1|LSS|PRKAA1	http://amigo.geneontology.org/amigo/term/GO:0006695
cellular response to cadmium ion	Gene Ontology	GO:0071276	5	39	0.115199	0.235271	UBE2D3|MAPK8|CHUK|OGG1|GSN	http://amigo.geneontology.org/amigo/term/GO:0071276
histone acetylation	Gene Ontology	GO:0016573	6	51	0.121842	0.24694	METTL8|TAF6|MED24|GTF2B|MBD3|ING4	http://amigo.geneontology.org/amigo/term/GO:0016573
skeletal muscle tissue development	Gene Ontology	GO:0007519	6	51	0.121842	0.24694	METTL8|SIX4|TAZ|MYL6|CFLAR|CFL2	http://amigo.geneontology.org/amigo/term/GO:0007519
integrin-mediated signaling pathway	Gene Ontology	GO:0007229	10	99	0.122997	0.248332	ITGB2|ITGB5|NME2|SEMA7A|DST|ITGA6|CEACAM1|ADAM15|ITGB1BP1|FUT8	http://amigo.geneontology.org/amigo/term/GO:0007229
activation of MAPK activity	Gene Ontology	GO:0000187	12	124	0.123475	0.248353	CD74|MADD|SPAG9|PRKAA1|MAP2K2|UBA52|NOD1|TLR4|NRG1|UBE2V1|IRAK1|PPIA	http://amigo.geneontology.org/amigo/term/GO:0000187
glycosphingolipid metabolic process	Gene Ontology	GO:0006687	5	40	0.124864	0.250199	SUMF2|CTSA|PSAP|ESYT1|BAX	http://amigo.geneontology.org/amigo/term/GO:0006687
positive regulation of actin filament polymerization	Gene Ontology	GO:0030838	6	52	0.130457	0.2576	DLG1|ARPC2|MYO1C|PFN2|BAIAP2|BIN1	http://amigo.geneontology.org/amigo/term/GO:0030838
endocytic recycling	Gene Ontology	GO:0032456	6	52	0.130457	0.2576	SNX12|MICALL1|VPS29|VPS52|DENND1A|RAB17	http://amigo.geneontology.org/amigo/term/GO:0032456
nucleobase-containing compound metabolic process	Gene Ontology	GO:0006139	6	52	0.130457	0.2576	UPP1|BPNT1|CTPS1|ERCC2|REXO2|EXD3	http://amigo.geneontology.org/amigo/term/GO:0006139
Wnt signaling pathway	Gene Ontology	GO:0016055	20	229	0.130498	0.2576	AMOTL1|RECK|VPS29|LRP6|CSNK1A1|OTULIN|TLE1|MACF1|CCNY|PRKAA1|UBA52|FBXW11|UBAC2|CTNND1|CTNNBIP1|CCDC88C|BCL9|C12orf43|LZTS2|BTRC	http://amigo.geneontology.org/amigo/term/GO:0016055
cell population proliferation	Gene Ontology	GO:0008283	14	151	0.131517	0.258631	CD74|DPH1|IRF2|MRPS27|ERCC2|RAC1|GNB1|BAX|SCRIB|YY1AP1|AURKB|ERCC1|NRG1|FAM83A	http://amigo.geneontology.org/amigo/term/GO:0008283
negative regulation of neuron death	Gene Ontology	GO:1901215	7	64	0.132482	0.258631	EIF4G1|ATP13A2|CSF1|BTBD10|PPARA|PARK7|HTRA2	http://amigo.geneontology.org/amigo/term/GO:1901215
positive regulation of autophagy	Gene Ontology	GO:0010508	7	64	0.132482	0.258631	OPTN|PRKAA1|TRIM8|SVIP|TRIM5|TRIM65|TRIM6	http://amigo.geneontology.org/amigo/term/GO:0010508
negative regulation of G0 to G1 transition	Gene Ontology	GO:0070317	5	41	0.134889	0.262367	EHMT1|CBX5|EZH2|PPP2R5B|CHEK1	http://amigo.geneontology.org/amigo/term/GO:0070317
positive regulation of cell death	Gene Ontology	GO:0010942	6	53	0.139354	0.269791	TRIM13|BMP4|EIF4G1|PRR7|NOD1|UCP2	http://amigo.geneontology.org/amigo/term/GO:0010942
phagocytosis	Gene Ontology	GO:0006909	8	77	0.139722	0.269791	ITGB2|TUSC2|MET|UNC13D|C1orf43|TLR4|DNM2|ANXA11	http://amigo.geneontology.org/amigo/term/GO:0006909
steroid biosynthetic process	Gene Ontology	GO:0006694	7	65	0.140491	0.270293	CYB5R2|SCP2|PRKAA1|EBP|LSS|SRD5A1|FDFT1	http://amigo.geneontology.org/amigo/term/GO:0006694
regulation of signal transduction by p53 class mediator	Gene Ontology	GO:1901796	14	153	0.141646	0.271531	EHMT1|TAF6|RPL5|RAD17|MBD3|PRKAG2|RHNO1|PRKAA1|MAPKAP1|RPA3|AURKB|AURKA|PIN1|CHEK1	http://amigo.geneontology.org/amigo/term/GO:1901796
positive regulation of DNA-binding transcription factor activity	Gene Ontology	GO:0051091	11	115	0.144014	0.275076	SMARCB1|TCF3|TRIM8|PARK7|HMGA2|PPARG|FOSL1|PPP2R5B|LRP6|TRIM5|FANK1	http://amigo.geneontology.org/amigo/term/GO:0051091
regulation of cytokinesis	Gene Ontology	GO:0032465	5	42	0.14526	0.276462	PIN1|CALM2|AURKA|AURKB|AHCTF1	http://amigo.geneontology.org/amigo/term/GO:0032465
negative regulation of gene expression	Gene Ontology	GO:0010629	26	314	0.148235	0.279064	FOXP1|PRKAA1|MAP2K2|EZH2|MYADM|PDCD10|GAS2L1|SNX12|PARK7|DNMT1|FYN|PC|AURKA|CNOT7|CD46|PAWR|NPM1|RACK1|CCNB1|BMP4|TERF2|MBD1|PICALM|FLOT2|TGIF1|TRIM6	http://amigo.geneontology.org/amigo/term/GO:0010629
JNK cascade	Gene Ontology	GO:0007254	6	54	0.148525	0.279064	MAP4K2|UBA52|NOD1|UBE2V1|MAPK8|IRAK1	http://amigo.geneontology.org/amigo/term/GO:0007254
phosphatidylinositol phosphorylation	Gene Ontology	GO:0046854	6	54	0.148525	0.279064	BPNT1|PI4KB|PIP5KL1|TTC7B|TTC7A|IP6K2	http://amigo.geneontology.org/amigo/term/GO:0046854
regulation of circadian rhythm	Gene Ontology	GO:0042752	7	66	0.148729	0.279064	PPP1CA|BTRC|PRKAA1|PPARG|EZH2|PPARA|MAPK8	http://amigo.geneontology.org/amigo/term/GO:0042752
carbohydrate metabolic process	Gene Ontology	GO:0005975	21	247	0.149653	0.279809	GALT|NAGPA|TALDO1|SLC2A8|HYAL3|PHKA1|SPATA20|PPP1CA|PGLS|UEVLD|MAN2A2|SLC3A2|PIGQ|RPE|MDH2|B3GAT3|TPD52L2|GALNT7|POFUT2|IDUA|GUSB	http://amigo.geneontology.org/amigo/term/GO:0005975
transcription initiation from RNA polymerase II promoter	Gene Ontology	GO:0006367	14	155	0.152191	0.283555	TAF6|ESRRA|MAML1|HDAC9|ERCC2|RXRB|POLR2H|GTF2B|PPARG|NR2C1|GTF2A2|PPARA|NCOR2|NCOR1	http://amigo.geneontology.org/amigo/term/GO:0006367
CENP-A containing nucleosome assembly	Gene Ontology	GO:0034080	5	43	0.15596	0.28755	CENPK|CENPM|NPM1|ITGB3BP|NASP	http://amigo.geneontology.org/amigo/term/GO:0034080
toxin transport	Gene Ontology	GO:1901998	5	43	0.15596	0.28755	SCFD1|ANTXR1|TCP1|LRP6|RAB29	http://amigo.geneontology.org/amigo/term/GO:1901998
antigen processing and presentation	Gene Ontology	GO:0019882	5	43	0.15596	0.28755	CD74|CTSH|CTSL|RAB6A|HLA-DMA	http://amigo.geneontology.org/amigo/term/GO:0019882
fat cell differentiation	Gene Ontology	GO:0045444	7	67	0.157188	0.287816	METTL8|HMGA2|NOC3L|TTC8|TMEM120A|NIPBL|SREBF1	http://amigo.geneontology.org/amigo/term/GO:0045444
cellular response to glucose stimulus	Gene Ontology	GO:0071333	7	67	0.157188	0.287816	PCK2|TJP1|NME2|PRKAA1|FIS1|UCP2|RACK1	http://amigo.geneontology.org/amigo/term/GO:0071333
electron transport chain	Gene Ontology	GO:0022900	9	92	0.158887	0.288935	COX5A|ASPH|CYB5A|NDUFS8|GFUS|AKR1A1|SDHA|NDUFS4|SRD5A1	http://amigo.geneontology.org/amigo/term/GO:0022900
SCF-dependent proteasomal ubiquitin-dependent protein catabolic process	Gene Ontology	GO:0031146	9	92	0.158887	0.288935	FBXW11|SKP2|PSMD1|BTRC|FBXL5|PSME1|PSMA4|PSMB5|FBXL6	http://amigo.geneontology.org/amigo/term/GO:0031146
multicellular organism growth	Gene Ontology	GO:0035264	8	80	0.162744	0.294938	ZFX|STK40|GIGYF2|APBA2|ERCC1|ERCC2|TTC8|ERCC6	http://amigo.geneontology.org/amigo/term/GO:0035264
regulation of apoptotic process	Gene Ontology	GO:0042981	22	264	0.164649	0.297377	RTKN|BAX|BOK|CRADD|MADD|SKP2|BCL2L12|CFLAR|AKT1S1|NOD1|CITED1|DAPK3|QRICH1|FANK1|TPT1|CTSB|IRF3|PLSCR3|NME2|DDX42|SRA1|TMEM219	http://amigo.geneontology.org/amigo/term/GO:0042981
positive regulation of endothelial cell migration	Gene Ontology	GO:0010595	7	68	0.165861	0.297524	BMP4|RAC1|GRN|FOXP1|GFUS|PDCD6|ITGB1BP1	http://amigo.geneontology.org/amigo/term/GO:0010595
gene silencing by RNA	Gene Ontology	GO:0031047	7	68	0.165861	0.297524	RBM4|SRRT|CNOT10|CNOT8|SND1|PRKRA|CNOT7	http://amigo.geneontology.org/amigo/term/GO:0031047
in utero embryonic development	Gene Ontology	GO:0001701	19	224	0.166451	0.297524	CCNB1|UBE2B|APBA2|UBE2A|ERCC2|POLG2|RIC8A|HM13|TERF2|MGAT1|N4BP2L2|FOSL1|POLB|MBD3|MBNL1|UNK|RAD51B|B9D1|FUT8	http://amigo.geneontology.org/amigo/term/GO:0001701
phospholipid transport	Gene Ontology	GO:0015914	5	44	0.166972	0.297524	PLTP|ABCA1|SCP2|PITPNM3|PITPNM2	http://amigo.geneontology.org/amigo/term/GO:0015914
positive regulation of neuron apoptotic process	Gene Ontology	GO:0043525	6	56	0.167648	0.297729	UBE2M|CDC34|BAX|FIS1|GRN|PIN1	http://amigo.geneontology.org/amigo/term/GO:0043525
wound healing	Gene Ontology	GO:0042060	10	106	0.168315	0.297917	CORO1B|DST|MACF1|SCRIB|CFLAR|PLEC|PPARA|NRG1|PAK1|GSN	http://amigo.geneontology.org/amigo/term/GO:0042060
double-strand break repair via nonhomologous end joining	Gene Ontology	GO:0006303	7	69	0.174741	0.308264	CYREN|ERCC1|MDC1|MLH1|BABAM1|POLB|NSD2	http://amigo.geneontology.org/amigo/term/GO:0006303
membrane fusion	Gene Ontology	GO:0061025	5	45	0.17828	0.312431	GOSR2|HUWE1|CHP1|YKT6|DNM2	http://amigo.geneontology.org/amigo/term/GO:0061025
protein peptidyl-prolyl isomerization	Gene Ontology	GO:0000413	5	45	0.17828	0.312431	PTPA|PIN1|AIP|FKBP2|PPIA	http://amigo.geneontology.org/amigo/term/GO:0000413
insulin receptor signaling pathway	Gene Ontology	GO:0008286	8	82	0.179005	0.31267	ATP6V0B|SLC2A8|GRB10|RHOQ|ATP6V1E1|SREBF1|BAIAP2|ZNF106	http://amigo.geneontology.org/amigo/term/GO:0008286
rhythmic process	Gene Ontology	GO:0048511	13	147	0.181536	0.316051	CAVIN3|SUV39H2|FBXW11|DDX5|HUWE1|PRKAA1|PPARG|EZH2|PPARA|MAPK8|RACK1|NCOR1|BTRC	http://amigo.geneontology.org/amigo/term/GO:0048511
cell projection organization	Gene Ontology	GO:0030030	17	201	0.185674	0.322199	CEP164|TWF2|WDR90|ODF2L|TCTN3|CDK10|MKS1|AHI1|TTC8|NUBP2|CC2D2A|RO60|AURKA|FLNA|CEP20|B9D1|GSN	http://amigo.geneontology.org/amigo/term/GO:0030030
intermembrane lipid transfer	Gene Ontology	GO:0120009	5	46	0.189866	0.325256	SCP2|GRAMD1A|ABCA1|PLTP|PITPNM2	http://amigo.geneontology.org/amigo/term/GO:0120009
cellular response to virus	Gene Ontology	GO:0098586	5	46	0.189866	0.325256	IRF3|POU2F2|CHUK|BAX|TRIM6	http://amigo.geneontology.org/amigo/term/GO:0098586
endosome to lysosome transport	Gene Ontology	GO:0008333	5	46	0.189866	0.325256	CHMP3|TSG101|HOOK2|BIN1|CHMP5	http://amigo.geneontology.org/amigo/term/GO:0008333
muscle contraction	Gene Ontology	GO:0006936	10	109	0.189886	0.325256	MYL6|ITGB5|ASPH|TPM4|VCL|TAZ|SLMAP|PXN|STAC|P2RX6	http://amigo.geneontology.org/amigo/term/GO:0006936
NIK/NF-kappaB signaling	Gene Ontology	GO:0038061	7	71	0.19309	0.329681	FBXW11|BTRC|PSMD1|CHUK|PSME1|PSMA4|PSMB5	http://amigo.geneontology.org/amigo/term/GO:0038061
response to lipopolysaccharide	Gene Ontology	GO:0032496	15	176	0.195991	0.333562	PCK2|MGST2|TJP1|CNP|ATP2A2|LITAF|CHUK|SRR|MGST1|FOXP1|TLR4|CITED1|IRAK1|IRF3|TRIM6	http://amigo.geneontology.org/amigo/term/GO:0032496
cell-cell adhesion	Gene Ontology	GO:0098609	15	178	0.20787	0.352648	DLG1|TJP1|LRP6|TRIM29|PPP1CA|VSIG10|CD44|ITGB2|SCRIB|ANXA2|ITGA6|CTNND1|NPHP4|BAIAP2|VEZT	http://amigo.geneontology.org/amigo/term/GO:0098609
stimulatory C-type lectin receptor signaling pathway	Gene Ontology	GO:0002223	10	112	0.212612	0.356999	FBXW11|TYROBP|FYN|BTRC|PSMD1|CHUK|PSME1|PSMA4|PSMB5|PAK1	http://amigo.geneontology.org/amigo/term/GO:0002223
ribosome biogenesis	Gene Ontology	GO:0042254	9	99	0.213509	0.356999	MRPL36|GTPBP10|FCF1|RPLP0|MTG2|EIF6|DHX30|EMG1|NIP7	http://amigo.geneontology.org/amigo/term/GO:0042254
ephrin receptor signaling pathway	Gene Ontology	GO:0048013	8	86	0.213512	0.356999	APH1B|RAC1|ARPC1B|FYN|NCSTN|ARHGEF28|ARPC2|PAK1	http://amigo.geneontology.org/amigo/term/GO:0048013
mitotic cell cycle	Gene Ontology	GO:0000278	13	152	0.213517	0.356999	ZNRD2|CCNB1|CLTC|TUBB6|PPP2R2D|ANAPC11|CDK11A|CDK11B|SKA3|AURKA|RRM1|TADA2A|TUBGCP4	http://amigo.geneontology.org/amigo/term/GO:0000278
protein destabilization	Gene Ontology	GO:0031648	5	48	0.213796	0.356999	CTSH|CCDC88C|FBXW11|BTRC|GSN	http://amigo.geneontology.org/amigo/term/GO:0031648
negative regulation of cell growth	Gene Ontology	GO:0030308	11	126	0.21845	0.363627	PSRC1|ENO1|APBB2|PPARG|NDUFS3|CAPRIN2|ADAM15|BST2|IP6K2|VGLL4|RACK1	http://amigo.geneontology.org/amigo/term/GO:0030308
response to peptide hormone	Gene Ontology	GO:0043434	6	61	0.219488	0.364213	STAT6|LRP6|STAT2|EIF2B2|SREBF1|DAG1	http://amigo.geneontology.org/amigo/term/GO:0043434
establishment or maintenance of cell polarity	Gene Ontology	GO:0007163	5	49	0.226103	0.371705	DLG1|PARD3|RAC2|RHOF|RAC1	http://amigo.geneontology.org/amigo/term/GO:0007163
fatty acid beta-oxidation	Gene Ontology	GO:0006635	5	49	0.226103	0.371705	ECI2|ACAT2|SCP2|ECHDC2|ECHDC1	http://amigo.geneontology.org/amigo/term/GO:0006635
proteolysis involved in cellular protein catabolic process	Gene Ontology	GO:0051603	5	49	0.226103	0.371705	CTSH|PSMB5|CTSL|CTSB|PSMA4	http://amigo.geneontology.org/amigo/term/GO:0051603
antigen processing and presentation of exogenous peptide antigen via MHC class I, TAP-dependent	Gene Ontology	GO:0002479	7	75	0.231903	0.380064	TAP2|ITGB5|PSMD1|CHUK|PSME1|PSMA4|PSMB5	http://amigo.geneontology.org/amigo/term/GO:0002479
protein-containing complex assembly	Gene Ontology	GO:0065003	11	128	0.23345	0.381421	CD74|CCNB1|PARD3|TSPAN4|DMTN|FANCC|FANCA|GMNN|CAPG|TUBGCP4|PICALM	http://amigo.geneontology.org/amigo/term/GO:0065003
negative regulation of cell cycle	Gene Ontology	GO:0045786	5	50	0.238612	0.38866	GMNN|TAF6|BMP4|RNF167|HTRA2	http://amigo.geneontology.org/amigo/term/GO:0045786
receptor-mediated endocytosis	Gene Ontology	GO:0006898	13	156	0.240721	0.390896	ITGB2|PI4KB|PDLIM7|MICALL1|REPS1|RABEPK|LDLRAD3|CLN3|CLTC|DNM2|ARHGAP27|PICALM|HIP1R	http://amigo.geneontology.org/amigo/term/GO:0006898
cytoskeleton organization	Gene Ontology	GO:0007010	14	171	0.250029	0.402014	ZMYM3|TUBB6|ANK1|SH3D19|SPTAN1|DST|DMTN|AGRN|MAST1|MICAL3|ABLIM1|SIPA1L3|BIN1|SH3KBP1	http://amigo.geneontology.org/amigo/term/GO:0007010
regulation of GTPase activity	Gene Ontology	GO:0043087	8	90	0.250314	0.402014	PLXNB2|STMN3|RDX|SBF1|ARHGAP27|EVI5|ITGB1BP1|RASA3	http://amigo.geneontology.org/amigo/term/GO:0043087
negative regulation of phosphatase activity	Gene Ontology	GO:0010923	5	51	0.251305	0.402014	GPATCH2|CHP1|PPP1R35|SH2D4A|ZCCHC9	http://amigo.geneontology.org/amigo/term/GO:0010923
negative regulation of autophagy	Gene Ontology	GO:0010507	5	51	0.251305	0.402014	SIRT2|EIF4G1|TLK2|ZKSCAN3|MET	http://amigo.geneontology.org/amigo/term/GO:0010507
regulation of cellular response to heat	Gene Ontology	GO:1900034	7	77	0.252222	0.402014	NUP50|DNAJC7|NUP85|RPA3|DNAJB6|HSP90AB1|AKT1S1	http://amigo.geneontology.org/amigo/term/GO:1900034
determination of left/right symmetry	Gene Ontology	GO:0007368	7	77	0.252222	0.402014	DAW1|ALG5|MKS1|CC2D2A|SUFU|AP1B1|DNAAF4	http://amigo.geneontology.org/amigo/term/GO:0007368
bone development	Gene Ontology	GO:0060348	6	64	0.252868	0.402014	BMP4|GNAS|ASXL1|PDGFC|SRD5A1|NSD2	http://amigo.geneontology.org/amigo/term/GO:0060348
regulation of gene expression	Gene Ontology	GO:0010468	25	325	0.255541	0.405052	FOXP1|FUBP1|PRKAA1|RC3H1|EZH2|PIN1|POFUT2|SIX4|DNMT1|NIPBL|HNRNPK|ZFP64|CHEK1|STK40|RO60|PPARA|IRF3|IRF1|BMP4|HNRNPDL|APBA2|PRDM4|FUT8|TRIM5|TRIM6	http://amigo.geneontology.org/amigo/term/GO:0010468
transcription by RNA polymerase II	Gene Ontology	GO:0006366	15	186	0.258391	0.40835	EHF|TBPL1|TAF6|IRF9|DEAF1|PRDM4|ERCC2|CTDP1|GTF2B|SUPT4H1|MBD1|ERCC6|GTF2A2|POLR2H|POLR2J3	http://amigo.geneontology.org/amigo/term/GO:0006366
cerebral cortex development	Gene Ontology	GO:0021987	7	78	0.262575	0.412557	LRP6|BAX|NDE1|ARHGAP11B|WDR62|FLNA|SRD5A1	http://amigo.geneontology.org/amigo/term/GO:0021987
positive regulation of cysteine-type endopeptidase activity involved in apoptotic process	Gene Ontology	GO:0043280	5	52	0.264161	0.412557	PDCD6|BCAP31|FIS1|NOD1|HTRA2	http://amigo.geneontology.org/amigo/term/GO:0043280
regulation of cellular amino acid metabolic process	Gene Ontology	GO:0006521	5	52	0.264161	0.412557	PSMB5|PSME1|PSMD1|PSMA4|OAZ1	http://amigo.geneontology.org/amigo/term/GO:0006521
negative regulation of I-kappaB kinase/NF-kappaB signaling	Gene Ontology	GO:0043124	5	52	0.264161	0.412557	TNIP1|USP10|OPTN|TLE1|PPM1A	http://amigo.geneontology.org/amigo/term/GO:0043124
protein deubiquitination	Gene Ontology	GO:0016579	21	271	0.267097	0.415919	NEDD8|SKP2|PSMA4|CCNA1|ASXL1|PSMD1|TFPT|ACTL6A|USP10|HGS|PSME1|USP39|UBA52|TNIP1|BABAM1|POLB|WDR20|BAP1|JOSD2|PSMB5|ATXN3	http://amigo.geneontology.org/amigo/term/GO:0016579
viral entry into host cell	Gene Ontology	GO:0046718	8	92	0.269432	0.418329	ZNF639|SLC52A2|CTSL|HYAL3|CTSB|CD46|DAG1|ITGB5	http://amigo.geneontology.org/amigo/term/GO:0046718
dephosphorylation	Gene Ontology	GO:0016311	15	188	0.271689	0.420603	PLPP1|ENTPD6|PPM1A|PPP1CA|NUDT16L1|PPM1K|INPP4B|NT5C3B|CTDSPL|PTPRF|CTDSP1|PRUNE1|DUSP14|THTPA|NT5C2	http://amigo.geneontology.org/amigo/term/GO:0016311
response to organic cyclic compound	Gene Ontology	GO:0014070	11	133	0.272546	0.420703	NEDD8|SRR|TXN2|PPARG|SREBF1|FOSL1|MBD3|PPARA|MBD1|SRD5A1|PLIN2	http://amigo.geneontology.org/amigo/term/GO:0014070
vascular endothelial growth factor receptor signaling pathway	Gene Ontology	GO:0048010	6	66	0.275853	0.424129	CYFIP1|RAC1|ABI1|FYN|PXN|BAIAP2	http://amigo.geneontology.org/amigo/term/GO:0048010
sphingolipid biosynthetic process	Gene Ontology	GO:0030148	5	53	0.277162	0.424129	PLPP1|CERS4|CERS5|ELOVL1|SPTLC1	http://amigo.geneontology.org/amigo/term/GO:0030148
protein targeting to membrane	Gene Ontology	GO:0006612	5	53	0.277162	0.424129	MICALL1|MYO1C|PARD3|YIF1B|EXOC4	http://amigo.geneontology.org/amigo/term/GO:0006612
cellular response to mechanical stimulus	Gene Ontology	GO:0071260	7	80	0.283622	0.432769	IRF1|RAC1|DAG1|TLR4|MAPK8|CRADD|CHEK1	http://amigo.geneontology.org/amigo/term/GO:0071260
exocytosis	Gene Ontology	GO:0006887	10	121	0.286557	0.435993	EXOC4|SCAMP1|DNAJC5|CDK16|SNX19|ANK1|UNC13D|MICAL3|STXBP2|PAK1	http://amigo.geneontology.org/amigo/term/GO:0006887
IRE1-mediated unfolded protein response	Gene Ontology	GO:0036498	5	54	0.290288	0.440408	GOSR2|HDGF|SEC31A|PPP2R5B|YIF1A	http://amigo.geneontology.org/amigo/term/GO:0036498
DNA duplex unwinding	Gene Ontology	GO:0032508	7	81	0.294296	0.445217	CHD1L|ERCC2|ERCC6|CHTF8|IGHMBP2|G3BP1|MCM8	http://amigo.geneontology.org/amigo/term/GO:0032508
heart development	Gene Ontology	GO:0007507	19	248	0.296968	0.447984	PDLIM7|DAW1|PDLIM2|PPARG|HDAC9|MBD3|TAZ|TSC2|CC2D2A|NIPBL|BMP4|MBD1|BCOR|ECE1|PPARA|NRG1|TCF25|AP1B1|DNAAF4	http://amigo.geneontology.org/amigo/term/GO:0007507
positive regulation of canonical Wnt signaling pathway	Gene Ontology	GO:0090263	12	150	0.29805	0.448342	RECK|PPM1A|UBE2B|PSMD1|PSME1|RNF220|CAPRIN2|PSMA4|TRPM4|PSMB5|DAPK3|PIN1	http://amigo.geneontology.org/amigo/term/GO:0090263
RNA export from nucleus	Gene Ontology	GO:0006405	5	55	0.303521	0.455281	HNRNPA1|SRSF11|THOC5|SRSF3|RNPS1	http://amigo.geneontology.org/amigo/term/GO:0006405
negative regulation of ERK1 and ERK2 cascade	Gene Ontology	GO:0070373	7	82	0.305057	0.456296	DLG1|SIRT3|TNIP1|TLR4|FBLN1|ITGB1BP1|PIN1	http://amigo.geneontology.org/amigo/term/GO:0070373
positive regulation of transcription by RNA polymerase II	Gene Ontology	GO:0045944	81	1149	0.310742	0.462819	STAT6|SPDEF|RNF10|HSF4|MPND|ZNF219|AHI1|ITGA6|AGRN|DPF1|CAPRIN2|GTF2A2|ZNF836|CAMTA2|NLRC5|PIN1|ITGB1BP1|METTL23|ZNF384|TCF3|MZF1|BCL2L12|ASXL1|CIITA|S1PR1|UBA52|NIPBL|HNRNPK|FOSL1|RNF111|SMARCA1|CITED1|ZFP64|CNOT7|ZSCAN21|SIRT2|SMARCB1|GLMP|FHOD1|DOT1L|RHOQ|HMGA2|CHUK|RXRB|HMGA1|EHF|PPARG|USF1|TNIP1|SMARCD1|PPARA|BRD4|IRF1|IRF2|TAF6|NPM1|SSBP4|IRF3|BMP4|ZNF639|ARID3B|LRP6|NME2|NRL|LITAF|ESRRA|MY…	http://amigo.geneontology.org/amigo/term/GO:0045944
transcription elongation from RNA polymerase II promoter	Gene Ontology	GO:0006368	6	69	0.311161	0.462819	ELOF1|ERCC2|CTDP1|SUPT4H1|ENY2|POLR2H	http://amigo.geneontology.org/amigo/term/GO:0006368
protein phosphorylation	Gene Ontology	GO:0006468	44	610	0.312487	0.463493	STK19|MAP4K4|PTK6|FYN|PRKAG2|TRIO|PRKAA1|MAP2K2|MAP4K2|YWHAZ|MAP3K8|GRK4|MAML1|CIITA|CDK10|CDK16|AURKA|AURKB|MARK3|MAPK8|IRAK1|DAPK3|CHEK1|NEK6|ST3GAL1|STK40|VRK2|PHKA1|CDK11A|CDK11B|CHUK|MAST1|BRD4|TAOK3|STK32C|CCNB1|PRKRA|CSNK1A1|TLK2|MOK|MET|SPEG|CLK3|PAK1	http://amigo.geneontology.org/amigo/term/GO:0006468
negative regulation of protein ubiquitination	Gene Ontology	GO:0031397	5	56	0.316842	0.466047	FYN|PARK7|CHP1|VPS28|PRR7	http://amigo.geneontology.org/amigo/term/GO:0031397
negative regulation of phosphoprotein phosphatase activity	Gene Ontology	GO:0032515	5	56	0.316842	0.466047	PTPA|PPP1R35|SET|TIPRL|PPP1R1C	http://amigo.geneontology.org/amigo/term/GO:0032515
substrate adhesion-dependent cell spreading	Gene Ontology	GO:0034446	5	56	0.316842	0.466047	LAMB3|RAC1|ANTXR1|AKIP1|PXN	http://amigo.geneontology.org/amigo/term/GO:0034446
male gonad development	Gene Ontology	GO:0008584	9	111	0.32059	0.468962	NASP|FANCA|SIX4|ERCC1|BAX|BOK|ADAM15|RRM1|SRD5A1	http://amigo.geneontology.org/amigo/term/GO:0008584
osteoblast differentiation	Gene Ontology	GO:0001649	9	111	0.32059	0.468962	BMP4|CLTC|RPS15|TPM4|BCAP29|DUS4L-BCAP29|SND1|HNRNPC|SEMA7A	http://amigo.geneontology.org/amigo/term/GO:0001649
neuron projection morphogenesis	Gene Ontology	GO:0048812	6	70	0.323099	0.471334	TRIO|MAP4K4|DTNBP1|DNM2|PAK1|TAOK3	http://amigo.geneontology.org/amigo/term/GO:0048812
O-glycan processing	Gene Ontology	GO:0016266	5	57	0.330232	0.476504	POMGNT1|ST3GAL1|GALNT7|GXYLT1|ST3GAL4	http://amigo.geneontology.org/amigo/term/GO:0016266
actin cytoskeleton reorganization	Gene Ontology	GO:0031532	5	57	0.330232	0.476504	FLNA|S1PR1|ANTXR1|PAK1|DTNBP1	http://amigo.geneontology.org/amigo/term/GO:0031532
response to hydrogen peroxide	Gene Ontology	GO:0042542	5	57	0.330232	0.476504	PDCD10|FOSL1|PARK7|FYN|PRKAA1	http://amigo.geneontology.org/amigo/term/GO:0042542
sphingolipid metabolic process	Gene Ontology	GO:0006665	5	57	0.330232	0.476504	CERS5|CERS4|SERINC2|PSAP|SPTLC1	http://amigo.geneontology.org/amigo/term/GO:0006665
negative regulation of apoptotic process	Gene Ontology	GO:0043066	39	543	0.335432	0.482694	CD74|MAP4K4|PRDX5|AHI1|PRKAA1|PDCD10|DAD1|OGG1|STK40|YWHAZ|SIX4|PARK7|HSP90AB1|CFLAR|CIB1|CLN3|AURKA|ARMC10|MAPK8|IRAK1|FANK1|CTSH|TPT1|CD44|HMGA2|TJP1|FLNA|TMBIM6|UCP2|NPM1|TAX1BP1|BMP4|NAA38|PTMA|NME2|UBE2B|HIP1R|UBA52|HNRNPK	http://amigo.geneontology.org/amigo/term/GO:0043066
double-strand break repair via homologous recombination	Gene Ontology	GO:0000724	7	85	0.33776	0.484732	SPIDR|RPA3|RAD51AP1|NSMCE1|RAD51C|RAD51B|MCM8	http://amigo.geneontology.org/amigo/term/GO:0000724
positive regulation of neuron projection development	Gene Ontology	GO:0010976	10	127	0.339348	0.485698	PLXNB2|TWF2|NME2|PTK6|FYN|ITGA6|CBFA2T2|CFLAR|BAIAP2|PPP2R5B	http://amigo.geneontology.org/amigo/term/GO:0010976
negative regulation of canonical Wnt signaling pathway	Gene Ontology	GO:0090090	14	184	0.342918	0.489488	MAD2L2|CTNND1|LRP6|CSNK1A1|TLE1|CCDC88C|PSMD1|PSME1|UBAC2|PSMA4|NPHP4|G3BP1|PSMB5|LZTS2	http://amigo.geneontology.org/amigo/term/GO:0090090
Fc-gamma receptor signaling pathway involved in phagocytosis	Gene Ontology	GO:0038096	10	128	0.348322	0.495178	CYFIP1|RAC1|ARPC2|ABI1|FYN|HSP90AB1|MYO1C|ARPC1B|BAIAP2|PAK1	http://amigo.geneontology.org/amigo/term/GO:0038096
cellular response to calcium ion	Gene Ontology	GO:0071277	7	86	0.34877	0.495178	FUS|ASPH|PRKAA1|NCSTN|SLC25A23|MCOLN1|DMTN	http://amigo.geneontology.org/amigo/term/GO:0071277
angiogenesis	Gene Ontology	GO:0001525	19	257	0.3529	0.499707	AMOTL1|YWHAZ|ANXA2|PDCD6|TNFSF12|OTULIN|S1PR1|RAMP1|CIB1|WARS1|ANGPTL2|ARHGAP22|BMP4|ADAM15|PDCD10|FLNA|CEACAM1|ITGB1BP1|ATP5IF1	http://amigo.geneontology.org/amigo/term/GO:0001525
regulation of cyclin-dependent protein serine/threonine kinase activity	Gene Ontology	GO:0000079	5	59	0.357152	0.502178	CCNB1|CCNY|CCND3|CDK5RAP1|CCNA1	http://amigo.geneontology.org/amigo/term/GO:0000079
fatty acid biosynthetic process	Gene Ontology	GO:0006633	6	73	0.359239	0.502178	PTGES2|PRKAG2|PRKAA1|SCD5|ELOVL1|FADS2	http://amigo.geneontology.org/amigo/term/GO:0006633
cellular protein localization	Gene Ontology	GO:0034613	6	73	0.359239	0.502178	OPTN|CD63|AHI1|NIPBL|SEPTIN7|SEPTIN9	http://amigo.geneontology.org/amigo/term/GO:0034613
double-strand break repair	Gene Ontology	GO:0006302	8	101	0.359495	0.502178	MAD2L2|ERCC1|MDC1|CIB1|BABAM1|BAP1|NSD2|MAPK8	http://amigo.geneontology.org/amigo/term/GO:0006302
negative regulation of DNA-binding transcription factor activity	Gene Ontology	GO:0043433	7	87	0.359817	0.502178	MAD2L2|BTRC|CTNNBIP1|EZH2|SIGIRR|SUFU|FLNA	http://amigo.geneontology.org/amigo/term/GO:0043433
protein phosphopantetheinylation	Gene Ontology	GO:0018215	16	215	0.36032	0.502178	ARPC4-TTLL3|UBE2M|FNTA|ZDHHC13|TPST1|LYPLA1|POMGNT1|UBE2E1|YKT6|UBE2E2|MGAT1|ABHD12|ASPH|QPCTL|GALNT7|ATAT1	http://amigo.geneontology.org/amigo/term/GO:0018215
T cell receptor signaling pathway	Gene Ontology	GO:0050852	13	173	0.36792	0.510478	FYN|FBXW11|EIF2B2|BTRC|PSMD1|CHUK|PSME1|RC3H1|PSMA4|BTN2A2|BTN2A1|PSMB5|PAK1	http://amigo.geneontology.org/amigo/term/GO:0050852
adenylate cyclase-activating G protein-coupled receptor signaling pathway	Gene Ontology	GO:0007189	9	116	0.368198	0.510478	NME2|GNAS|S1PR1|ABCA1|RAMP1|ADCY3|ADGRL1|GPR161|ADGRB2	http://amigo.geneontology.org/amigo/term/GO:0007189
regulation of autophagy	Gene Ontology	GO:0010506	6	74	0.371352	0.51351	PSAP|GPR137|USP10|BOK|CLN3|DAPK3	http://amigo.geneontology.org/amigo/term/GO:0010506
regulation of cell population proliferation	Gene Ontology	GO:0042127	14	188	0.372914	0.514331	STAT6|ESRRA|RBFOX2|CCND3|DNMT1|CHEK1|RPA3|EZH2|TPD52L2|CFDP1|FANCA|CIB1|TES|STAT2	http://amigo.geneontology.org/amigo/term/GO:0042127
regulation of transcription, DNA-templated	Gene Ontology	GO:0006355	98	1422	0.375624	0.516727	ZFX|HSF4|OGG1|CREBZF|SIX4|SIX5|APBB2|ZNF266|ZNF789|ZNF664|ZSCAN21|ZNF44|EHF|NR2C1|PQBP1|ZNF846|ZKSCAN3|ZNF561|FOXP1|ZNF211|FUS|FOXP4|RPL6|ZNF75A|FUBP1|ZNF219|PHF1|ZFP90|DNM2|ASXL1|SUPT4H1|ZNF287|ZNF517|TCF3|EFEMP1|CDK11A|CDK11B|PPARG|ZNF586|ZNF28|IRF3|IRF2|IRF1|CUX1|SRRT|IRF9|SPDEF|ASCC2|ASCC1|NSD2|HES4|ZNF429|TLE1|PPARA|ZNF195|ZNF836|HINT1|STAT6|ZNF530|STAT2|CIITA|PDCD6-AHRR|USF1|FOSL1|ZNF347|CI…	http://amigo.geneontology.org/amigo/term/GO:0006355
small GTPase mediated signal transduction	Gene Ontology	GO:0007264	9	117	0.377819	0.518403	RAC2|RAC1|RUFY1|RHOQ|CCDC88C|CHP1|RGS19|RHOF|NUCB2	http://amigo.geneontology.org/amigo/term/GO:0007264
xenobiotic metabolic process	Gene Ontology	GO:0006805	7	89	0.381988	0.522772	NAT1|AIP|PDCD6-AHRR|HSP90AB1|MAOA|CES2|GUK1	http://amigo.geneontology.org/amigo/term/GO:0006805
regulation of metabolic process	Gene Ontology	GO:0019222	5	61	0.384144	0.523027	PEX11A|FDFT1|S1PR1|PLIN2|ABCA1	http://amigo.geneontology.org/amigo/term/GO:0019222
negative regulation of G2/M transition of mitotic cell cycle	Gene Ontology	GO:0010972	5	61	0.384144	0.523027	PSMB5|PSMD1|AURKA|PSMA4|PSME1	http://amigo.geneontology.org/amigo/term/GO:0010972
ubiquitin-dependent protein catabolic process	Gene Ontology	GO:0006511	22	307	0.393111	0.533867	UBE2B|ANAPC11|UBE2D3|RC3H1|NEDD8|SKP2|ANAPC15|CDC34|ANAPC10|AURKA|PSMA4|RNF111|ARIH2|UBE2E1|USP10|UBE2S|RNF167|UBE2A|BTRC|AURKB|BAP1|ATXN3	http://amigo.geneontology.org/amigo/term/GO:0006511
positive regulation of smooth muscle cell proliferation	Gene Ontology	GO:0048661	5	62	0.397626	0.535886	IRAK1|S1PR1|BMP4|SKP2|FOXP1	http://amigo.geneontology.org/amigo/term/GO:0048661
anatomical structure development	Gene Ontology	GO:0048856	5	62	0.397626	0.535886	SIX4|C14orf93|NR2C1|RXRB|ATXN1	http://amigo.geneontology.org/amigo/term/GO:0048856
synapse organization	Gene Ontology	GO:0050808	5	62	0.397626	0.535886	AGRN|FLNA|PIN1|APBB2|PPFIA1	http://amigo.geneontology.org/amigo/term/GO:0050808
protein autophosphorylation	Gene Ontology	GO:0046777	13	177	0.399449	0.53698	NEK6|IRAK1|NME2|PTK6|VRK2|FYN|PAK1|AURKA|AURKB|CLK3|DAPK3|ATP13A2|TAOK3	http://amigo.geneontology.org/amigo/term/GO:0046777
positive regulation of proteasomal ubiquitin-dependent protein catabolic process	Gene Ontology	GO:0032436	6	77	0.407722	0.541643	SIRT2|CSNK1A1|ARIH2|COP1|AURKA|RACK1	http://amigo.geneontology.org/amigo/term/GO:0032436
phosphatidylinositol biosynthetic process	Gene Ontology	GO:0006661	6	77	0.407722	0.541643	PI4KB|RUFY1|INPP4B|SBF1|PITPNM3|PITPNM2	http://amigo.geneontology.org/amigo/term/GO:0006661
regulation of growth	Gene Ontology	GO:0040008	6	77	0.407722	0.541643	TSG101|HMGA2|CAPRIN2|ACTL6A|ARMC10|RACK1	http://amigo.geneontology.org/amigo/term/GO:0040008
epidermis development	Gene Ontology	GO:0008544	8	106	0.410948	0.541643	ATP2A2|KRT34|AGPAT2|FLOT2|PPARA|LAMB3|SHARPIN|COL17A1	http://amigo.geneontology.org/amigo/term/GO:0008544
camera-type eye development	Gene Ontology	GO:0043010	5	63	0.411078	0.541643	EFEMP1|CC2D2A|BMP4|HSF4|B9D1	http://amigo.geneontology.org/amigo/term/GO:0043010
response to estrogen	Gene Ontology	GO:0043627	5	63	0.411078	0.541643	ARPC1B|CITED1|DTYMK|SRD5A1|PPARG	http://amigo.geneontology.org/amigo/term/GO:0043627
adenylate cyclase-inhibiting G protein-coupled receptor signaling pathway	Gene Ontology	GO:0007193	5	63	0.411078	0.541643	GABBR1|RIC8A|PSAP|S1PR1|ADCY3	http://amigo.geneontology.org/amigo/term/GO:0007193
positive regulation of protein kinase activity	Gene Ontology	GO:0045860	5	63	0.411078	0.541643	NRG1|PRKAG2|NPM1|DAG1|CSF1	http://amigo.geneontology.org/amigo/term/GO:0045860
negative regulation of NF-kappaB transcription factor activity	Gene Ontology	GO:0032088	7	92	0.415297	0.544501	TAX1BP1|OTULIN|CHP1|CHUK|AIM2|NLRC5|IRAK1	http://amigo.geneontology.org/amigo/term/GO:0032088
response to toxic substance	Gene Ontology	GO:0009636	7	92	0.415297	0.544501	SCFD1|CCNB1|CNP|CHUK|BAX|ERCC6|CHKA	http://amigo.geneontology.org/amigo/term/GO:0009636
cellular iron ion homeostasis	Gene Ontology	GO:0006879	5	64	0.424485	0.555177	NEDD8|ABCG2|ATP13A2|FBXL5|TTC7A	http://amigo.geneontology.org/amigo/term/GO:0006879
response to ethanol	Gene Ontology	GO:0045471	9	122	0.426085	0.5559	TJP1|FYN|RGS19|RPL15|SREBF1|POLB|PPARA|OGG1|GSN	http://amigo.geneontology.org/amigo/term/GO:0045471
defense response to virus	Gene Ontology	GO:0051607	15	210	0.428685	0.557921	IRF3|IRF2|IRF1|SKP2|STAT2|CNOT7|IRF9|BST2|PQBP1|UNC13D|G3BP1|NLRC5|FLNA|TRIM5|IFI27	http://amigo.geneontology.org/amigo/term/GO:0051607
negative regulation of signal transduction	Gene Ontology	GO:0009968	5	65	0.437835	0.568436	SEC14L1|RGS19|SNX13|RGS10|PTK6	http://amigo.geneontology.org/amigo/term/GO:0009968
neuron projection development	Gene Ontology	GO:0031175	10	138	0.439222	0.568846	CYFIP1|BLOC1S2|STMN3|MICALL1|CDK16|PQBP1|ERCC6|OPHN1|DTNBP1|SEMA7A	http://amigo.geneontology.org/amigo/term/GO:0031175
cellular response to amino acid starvation	Gene Ontology	GO:0034198	6	80	0.443901	0.573508	ATP6V0B|ATP6V1E1|LAMTOR4|MAPK8|UCP2|KPTN	http://amigo.geneontology.org/amigo/term/GO:0034198
cellular oxidant detoxification	Gene Ontology	GO:0098869	6	81	0.45587	0.587541	PRDX5|SELENOT|MGST2|MGST1|GPX8|PARK7	http://amigo.geneontology.org/amigo/term/GO:0098869
response to estradiol	Gene Ontology	GO:0032355	8	111	0.46226	0.594334	ESRRA|ARPC1B|EZH2|MBD1|MBD3|SRD5A1|NCOR2|OGG1	http://amigo.geneontology.org/amigo/term/GO:0032355
post-embryonic development	Gene Ontology	GO:0009791	5	68	0.4774	0.612317	BMP4|ERCC2|ZFX|GIGYF2|BAX	http://amigo.geneontology.org/amigo/term/GO:0009791
intracellular signal transduction	Gene Ontology	GO:0035556	31	456	0.480809	0.615204	MAP4K2|MAP4K4|KCTD9|PRKAG2|PRKAA1|STAC|NLRC5|ITGB1BP1|PPP1R1C|RACGAP1|FYN|APBB2|NOD1|WSB1|MARK3|TNS3|MAPK8|IRAK1|DAPK3|CHEK1|RAC1|NRG1|RASA3|STK32C|TLK2|ADCY3|MAST1|MOK|ARHGEF28|NSMCE1|TYROBP	http://amigo.geneontology.org/amigo/term/GO:0035556
transmembrane receptor protein tyrosine kinase signaling pathway	Gene Ontology	GO:0007169	9	128	0.483608	0.617298	PTK6|FYN|ABI1|CNKSR1|AHI1|CSF1|MET|POLR1G|NRG1	http://amigo.geneontology.org/amigo/term/GO:0007169
regulation of hematopoietic stem cell differentiation	Gene Ontology	GO:1902036	5	69	0.490387	0.61999	PSMB5|PSMD1|PSMA4|TCF3|PSME1	http://amigo.geneontology.org/amigo/term/GO:1902036
positive regulation of NIK/NF-kappaB signaling	Gene Ontology	GO:1901224	5	69	0.490387	0.61999	RC3H1|TRIP6|IRAK1|NOD1|TLR4	http://amigo.geneontology.org/amigo/term/GO:1901224
cellular response to retinoic acid	Gene Ontology	GO:0071300	5	69	0.490387	0.61999	PPARG|TWF2|PTK6|HTRA2|ABCA1	http://amigo.geneontology.org/amigo/term/GO:0071300
hemopoiesis	Gene Ontology	GO:0030097	5	69	0.490387	0.61999	ASXL1|TTC7A|TAZ|PICALM|CD164	http://amigo.geneontology.org/amigo/term/GO:0030097
transcription, DNA-templated	Gene Ontology	GO:0006351	8	114	0.492637	0.621354	THAP1|RNPS1|PTMA|ASXL1|CBFA2T2|CNOT8|POLR2H|POLR2J3	http://amigo.geneontology.org/amigo/term/GO:0006351
cell cycle arrest	Gene Ontology	GO:0007050	9	130	0.502503	0.631747	TSG101|IRF1|GAS2L1|PPM1A|PRKAG2|APBB2|LAMTOR4|PRKAA1|ING4	http://amigo.geneontology.org/amigo/term/GO:0007050
smoothened signaling pathway	Gene Ontology	GO:0007224	5	70	0.503256	0.631747	CC2D2A|SUFU|RO60|B9D1|TCTN3	http://amigo.geneontology.org/amigo/term/GO:0007224
positive regulation of protein phosphorylation	Gene Ontology	GO:0001934	14	206	0.50942	0.637478	CD74|FNIP1|ANXA2|RAC1|CCND3|CIB1|CLN3|LIMCH1|BMP4|PIN1|SEMA7A|PAK1|PPIA|RACK1	http://amigo.geneontology.org/amigo/term/GO:0001934
response to hypoxia	Gene Ontology	GO:0001666	12	176	0.510222	0.637478	SCFD1|SLC2A8|ERCC2|PRKAA1|TXN2|CFLAR|USF1|PPARA|UCP2|AGTRAP|PAK1|PIN1	http://amigo.geneontology.org/amigo/term/GO:0001666
cellular response to organic cyclic compound	Gene Ontology	GO:0071407	5	71	0.515995	0.643177	HSP90AB1|SRD5A1|BTRC|CCNB1|ITGA6	http://amigo.geneontology.org/amigo/term/GO:0071407
proton transmembrane transport	Gene Ontology	GO:1902600	8	117	0.522511	0.649774	ATP6V0B|COX5A|ATP2A2|ATP6V1E1|CYB5A|ATP5MC1|ATP5MF|UCP2	http://amigo.geneontology.org/amigo/term/GO:1902600
collagen fibril organization	Gene Ontology	GO:0030199	7	102	0.5241	0.650227	ANXA2|DST|ITGA6|CD151|PLEC|LAMB3|COL17A1	http://amigo.geneontology.org/amigo/term/GO:0030199
protein import into nucleus	Gene Ontology	GO:0006606	6	87	0.526067	0.651146	NUP50|SNUPN|NUP85|IPO7|RPAIN|TSC2	http://amigo.geneontology.org/amigo/term/GO:0006606
regulation of transcription from RNA polymerase II promoter in response to hypoxia	Gene Ontology	GO:0061418	5	72	0.528595	0.652753	PSMB5|PSMD1|UBA52|PSMA4|PSME1	http://amigo.geneontology.org/amigo/term/GO:0061418
cellular response to starvation	Gene Ontology	GO:0009267	5	73	0.541048	0.666344	FNIP1|SRD5A1|SREBF1|GAS2L1|PPARA	http://amigo.geneontology.org/amigo/term/GO:0009267
nervous system development	Gene Ontology	GO:0007399	37	559	0.542111	0.666344	DPF1|CYFIP1|NUMB|STMN3|NRSN2|ERCC6|FKTN|NDE1|APLP1|P2RX5|PRPS1|NAP1L1|DEAF1|OPHN1|DNAAF4|NRG1|MBNL1|SIRT2|SMARCB1|TCF3|NAGLU|SCD5|WDR62|BAX|SMARCD1|SEMA7A|BPNT1|RBFOX2|APBA2|FEZ2|SIGMAR1|MET|ACTL6A|SDHA|HES4|ATXN3|ATXN1	http://amigo.geneontology.org/amigo/term/GO:0007399
regulation of cell migration	Gene Ontology	GO:0030334	7	104	0.545015	0.668368	AMOTL1|PLXNB2|RAC1|MACF1|VCL|CEACAM1|FLNA	http://amigo.geneontology.org/amigo/term/GO:0030334
fatty acid metabolic process	Gene Ontology	GO:0006631	13	196	0.548126	0.670633	FADS2|PTGES2|LYPLA1|ACSF2|PRKAG2|PRKAA1|ELOVL1|PPARG|ACAT2|PPARA|SCD5|ECHDC3|ECHDC2	http://amigo.geneontology.org/amigo/term/GO:0006631
Ras protein signal transduction	Gene Ontology	GO:0007265	5	74	0.553345	0.672371	GNB1|PARK7|DNMT1|G3BP1|CNKSR1	http://amigo.geneontology.org/amigo/term/GO:0007265
negative regulation of neuron projection development	Gene Ontology	GO:0010977	5	74	0.553345	0.672371	RAB29|CIB1|MAP4K4|FLNA|CBFA2T2	http://amigo.geneontology.org/amigo/term/GO:0010977
response to glucose	Gene Ontology	GO:0009749	5	74	0.553345	0.672371	TXN2|UCP2|SREBF1|EIF2B2|SELENOT	http://amigo.geneontology.org/amigo/term/GO:0009749
MAPK cascade	Gene Ontology	GO:0000165	20	305	0.563177	0.682755	DLG1|PSMD1|MAP3K8|MAP4K2|LYPLA1|PDE6D|MAP2K2|MAP4K4|SPTAN1|FYN|FNTA|PSME1|MET|PSMA4|MARK3|NRG1|PSMB5|TAOK3|MAPK8|RASA3	http://amigo.geneontology.org/amigo/term/GO:0000165
transforming growth factor beta receptor signaling pathway	Gene Ontology	GO:0007179	7	106	0.565537	0.683874	PARD3|ITGB5|FNTA|UBA52|PXN|CITED1|FUT8	http://amigo.geneontology.org/amigo/term/GO:0007179
negative regulation of cell population proliferation	Gene Ontology	GO:0008285	30	458	0.566675	0.683874	TSG101|BAX|FKTN|ITGB1BP1|TSC2|CDK10|WARS1|CIB1|FOSL1|TES|LZTS2|PLPP1|SIRT2|SMARCB1|HGS|HMGA1|PPARG|ING4|NPM1|TAF6|IRF1|BMP4|TP53I11|CNOT7|ABI1|CD164|SIX5|SPEG|BAP1|PRKRA	http://amigo.geneontology.org/amigo/term/GO:0008285
Wnt signaling pathway, planar cell polarity pathway	Gene Ontology	GO:0060071	6	91	0.570751	0.687231	CLTC|RAC1|PSMD1|PSME1|PSMA4|PSMB5	http://amigo.geneontology.org/amigo/term/GO:0060071
neuron differentiation	Gene Ontology	GO:0030182	12	184	0.573444	0.688911	HDAC9|S1PR1|PIGT|OPHN1|ERCC6|MET|MBD1|BAIAP2|SMARCA1|PIN1|DAPK3|PPIA	http://amigo.geneontology.org/amigo/term/GO:0030182
microtubule cytoskeleton organization	Gene Ontology	GO:0000226	9	139	0.58453	0.700644	PARD3|GAS2L1|CNP|TUBB6|TBCE|AURKA|MARK3|TUBGCP4|ATXN3	http://amigo.geneontology.org/amigo/term/GO:0000226
protein folding	Gene Ontology	GO:0006457	11	171	0.592542	0.708648	SIL1|GNB4|TBCE|DNAJC7|GNB1|DNAJB6|HSP90AB1|TCP1|MPDU1|NGLY1|PPIA	http://amigo.geneontology.org/amigo/term/GO:0006457
fibroblast growth factor receptor signaling pathway	Gene Ontology	GO:0008543	5	78	0.60083	0.716946	HNRNPA1|TIA1|HNRNPH1|RBFOX2|POLR2H	http://amigo.geneontology.org/amigo/term/GO:0008543
glucose homeostasis	Gene Ontology	GO:0042593	7	110	0.605242	0.720591	PLSCR3|PARK7|PRKAA1|SELENOT|PPARG|USF1|PRCP	http://amigo.geneontology.org/amigo/term/GO:0042593
lipid transport	Gene Ontology	GO:0006869	9	142	0.610466	0.724059	OSBPL10|SCP2|ESYT1|SIGMAR1|PLTP|ABCA1|RELCH|GRAMD1A|CHKA	http://amigo.geneontology.org/amigo/term/GO:0006869
post-translational protein modification	Gene Ontology	GO:0043687	22	344	0.611229	0.724059	FBXW11|ANO8|PSMD1|RAB2A|TMEM132A|NEDD8|SKP2|COP1|WSB1|PSMA4|SUMF2|PSME1|KLHL2|STT3A|COPS7B|BMP4|UBE2M|BTRC|FBXL5|CSF1|PSMB5|DCAF8	http://amigo.geneontology.org/amigo/term/GO:0043687
response to nutrient	Gene Ontology	GO:0007584	5	79	0.612246	0.724059	ERCC1|PPARG|ABCA1|DAD1|C2	http://amigo.geneontology.org/amigo/term/GO:0007584
steroid metabolic process	Gene Ontology	GO:0008202	8	127	0.616797	0.72782	CYB5R2|ERLIN2|PRKAA1|SREBF1|EBP|ABCA1|SRD5A1|FDFT1	http://amigo.geneontology.org/amigo/term/GO:0008202
lipid metabolic process	Gene Ontology	GO:0006629	39	607	0.618719	0.728469	CYB5R2|LYPLA1|PRKAG2|PRKAA1|MGST2|BTN2A1|CHKA|CERS4|CERS5|PLA2G12A|ABHD12|PC|ACAT2|LSS|SPTLC1|EBP|SRD5A1|FDFT1|AGPAT2|PLPP1|ST3GAL1|ST3GAL4|ACSF2|PNPLA4|SCD5|PPARG|FADS2|IP6K2|OSBPL10|ERLIN2|PTGES2|GSTM4|ELOVL1|SREBF1|PLTP|PSAP|ABCA1|ECHDC3|ECHDC2	http://amigo.geneontology.org/amigo/term/GO:0006629
microtubule-based movement	Gene Ontology	GO:0007018	5	80	0.623469	0.72865	RACGAP1|KLC1|DYNC1I1|KIFC3|DNAH14	http://amigo.geneontology.org/amigo/term/GO:0007018
cellular response to interferon-gamma	Gene Ontology	GO:0071346	6	96	0.623524	0.72865	CIITA|MYO1C|RPL13A|TLR4|DAPK3|GSN	http://amigo.geneontology.org/amigo/term/GO:0071346
nucleosome assembly	Gene Ontology	GO:0006334	7	112	0.624361	0.72865	NASP|SET|NAP1L1|H2BC11|H2BC15|CHAF1A|NPM1	http://amigo.geneontology.org/amigo/term/GO:0006334
Notch signaling pathway	Gene Ontology	GO:0007219	7	112	0.624361	0.72865	APH1B|DTX2|DTX3|MAML1|NCSTN|SORBS2|ITGB1BP1	http://amigo.geneontology.org/amigo/term/GO:0007219
transmembrane transport	Gene Ontology	GO:0055085	41	641	0.632213	0.732428	KCNC4|TAP2|ANO8|TUSC3|SLC7A6|PSMD1|SFXN4|SFXN5|SFXN2|VDAC2|CNGA1|SLC37A2|SLC39A11|NALCN|SLC49A3|PDZD11|PSMA4|TRPM4|ABCB9|MFSD9|SLC44A1|SLC44A2|MFSD12|MPV17|KCNQ5|CNNM3|PSME1|SLC25A22|SLC25A23|DMTN|SLC25A29|ABCG2|SLC20A1|ERLIN2|SLC2A8|SLC16A3|SLC35B1|UBA52|SLC25A36|ABCA1|PSMB5	http://amigo.geneontology.org/amigo/term/GO:0055085
positive regulation of cold-induced thermogenesis	Gene Ontology	GO:0120162	6	97	0.633621	0.732428	EHMT1|STAT6|PDGFC|GNAS|GRB10|UCP2	http://amigo.geneontology.org/amigo/term/GO:0120162
cellular response to hypoxia	Gene Ontology	GO:0071456	8	129	0.634443	0.732428	SIRT2|CCNB1|SUV39H2|GNB1|PRKAA1|CFLAR|TBL2|IRAK1	http://amigo.geneontology.org/amigo/term/GO:0071456
regulation of G2/M transition of mitotic cell cycle	Gene Ontology	GO:0010389	5	81	0.634495	0.732428	CEP63|NDE1|DYNLL1|AURKA|CEP164	http://amigo.geneontology.org/amigo/term/GO:0010389
B cell differentiation	Gene Ontology	GO:0030183	5	81	0.634495	0.732428	HDAC9|DCAF1|EZH2|TCF3|YY1AP1	http://amigo.geneontology.org/amigo/term/GO:0030183
positive regulation of gene expression	Gene Ontology	GO:0010628	32	509	0.661131	0.761519	CD74|DNMT1|TLE1|FUBP1|PRKAA1|PDCD10|FBLN1|GSN|TYROBP|PARK7|ATP13A2|WARS1|NRG1|MAPK8|CTSH|RPL5|CD46|HMGA2|RDX|HGS|IL32|ERCC6|DTNBP1|PAWR|CITED1|BMP4|NRL|C14orf93|CSF1|TERF2|TLR4|TRIM6	http://amigo.geneontology.org/amigo/term/GO:0010628
defense response to Gram-negative bacterium	Gene Ontology	GO:0050829	5	84	0.66636	0.763647	TLR4|RPS19|OPTN|TUSC2|H2BC11	http://amigo.geneontology.org/amigo/term/GO:0050829
positive regulation of cell growth	Gene Ontology	GO:0030307	5	84	0.66636	0.763647	NRG1|ZNF639|CIB1|EIF4G1|DERL2	http://amigo.geneontology.org/amigo/term/GO:0030307
brain development	Gene Ontology	GO:0007420	17	276	0.667293	0.763647	PLXNB2|CDK5RAP1|CTNND1|QARS1|S1PR1|SRR|MAST1|NIPBL|BOK|NDUFS4|MBD3|BAIAP2|SMARCA1|CITED1|PPP3CC|SHARPIN|ATXN1	http://amigo.geneontology.org/amigo/term/GO:0007420
Golgi organization	Gene Ontology	GO:0007030	7	117	0.669817	0.764887	OPTN|CSNK1A1|RAB29|HUWE1|RAB2A|PLEKHM2|KIFC3	http://amigo.geneontology.org/amigo/term/GO:0007030
Fc-epsilon receptor signaling pathway	Gene Ontology	GO:0038095	10	166	0.674781	0.768602	MAPK8|FBXW11|RAC1|BTRC|PSMD1|CHUK|PSME1|PSMA4|PSMB5|PAK1	http://amigo.geneontology.org/amigo/term/GO:0038095
axon guidance	Gene Ontology	GO:0007411	14	230	0.675964	0.768602	TRIO|PDLIM7|CYFIP1|VSTM2L|GRB10|FEZ2|FYN|TTC8|SH3KBP1|DAG1|SPTAN1|OPHN1|SEMA7A|CRPPA	http://amigo.geneontology.org/amigo/term/GO:0007411
peptidyl-serine phosphorylation	Gene Ontology	GO:0018105	10	167	0.682061	0.773877	NEK6|STK32C|CSNK1A1|VRK2|TLK2|CHUK|MAST1|AURKA|MARK3|MAPK8	http://amigo.geneontology.org/amigo/term/GO:0018105
negative regulation of transforming growth factor beta receptor signaling pathway	Gene Ontology	GO:0030512	5	86	0.686566	0.777327	UBA52|PPARA|PIN1|PPM1A|DNM2	http://amigo.geneontology.org/amigo/term/GO:0030512
response to bacterium	Gene Ontology	GO:0009617	7	120	0.695392	0.783396	IRF3|RAB29|MLH1|TLR4|BAIAP2|NLRC5|IFI44	http://amigo.geneontology.org/amigo/term/GO:0009617
positive regulation of JNK cascade	Gene Ontology	GO:0046330	5	87	0.696352	0.783396	GADD45B|MAP4K2|NOD1|TLR4|TAOK3	http://amigo.geneontology.org/amigo/term/GO:0046330
cell morphogenesis	Gene Ontology	GO:0000902	5	87	0.696352	0.783396	SCFD1|NRG1|ASXL1|CYFIP1|ARHGEF28	http://amigo.geneontology.org/amigo/term/GO:0000902
negative regulation of cell migration	Gene Ontology	GO:0030336	9	154	0.705226	0.790816	CD74|RECK|TCAF1|LIMCH1|VCL|ADAM15|BST2|PIP5KL1|DAG1	http://amigo.geneontology.org/amigo/term/GO:0030336
cellular response to leukemia inhibitory factor	Gene Ontology	GO:1990830	5	88	0.705926	0.790816	PDCD10|EIF4A2|BCAT2|SRSF3|PFKP	http://amigo.geneontology.org/amigo/term/GO:1990830
positive regulation of cell population proliferation	Gene Ontology	GO:0008284	34	552	0.709834	0.79352	HSF4|PRKAA1|PDGFC|DBF4B|PDCD10|ITGB1BP1|RPS9|EIF5A|DLG1|BLOC1S2|NAP1L1|S1PR1|RAD51B|DERL2|CIB1|FOSL1|CAPN1|TRPM4|DOT1L|CNOT7|CTSH|DHPS|RAC2|CNOT8|NRG1|TJP1|NPM1|SHMT2|BMP4|UBE2A|CSF1|EZH2|BST1|PAK1	http://amigo.geneontology.org/amigo/term/GO:0008284
spermatid development	Gene Ontology	GO:0007286	5	89	0.715287	0.797936	SBF1|SIX5|STRBP|CIB1|DYNLL1	http://amigo.geneontology.org/amigo/term/GO:0007286
cholesterol metabolic process	Gene Ontology	GO:0008203	6	106	0.716977	0.798144	ERLIN2|PRKAA1|SREBF1|EBP|ABCA1|FDFT1	http://amigo.geneontology.org/amigo/term/GO:0008203
platelet degranulation	Gene Ontology	GO:0002576	7	124	0.727429	0.808085	CD63|PSAP|VCL|BRPF3|STXBP2|TEX264|FLNA	http://amigo.geneontology.org/amigo/term/GO:0002576
neuron migration	Gene Ontology	GO:0001764	6	108	0.733594	0.811474	RAC1|FYN|BAX|NDE1|UNK|DNAAF4	http://amigo.geneontology.org/amigo/term/GO:0001764
extracellular matrix organization	Gene Ontology	GO:0030198	15	256	0.733924	0.811474	RECK|ITGB2|ITGB5|CD44|ERCC2|DNAJB6|ITGA6|AGRN|ST7|DAG1|APLP1|FBLN1|COL17A1|LAMB3|ADAM15	http://amigo.geneontology.org/amigo/term/GO:0030198
tumor necrosis factor-mediated signaling pathway	Gene Ontology	GO:0033209	7	125	0.735064	0.811474	TNFSF12|PSMD1|CHUK|AIM2|PSMA4|PSMB5|PSME1	http://amigo.geneontology.org/amigo/term/GO:0033209
protein homooligomerization	Gene Ontology	GO:0051260	6	109	0.741639	0.815945	KCNC4|KCTD3|FUS|KCTD9|TMEM120A|SHKBP1	http://amigo.geneontology.org/amigo/term/GO:0051260
ion transmembrane transport	Gene Ontology	GO:0034220	18	306	0.742187	0.815945	ATP6V0B|KCNC4|ATP13A2|ANO8|ATP2A2|CALHM2|ATP6V1E1|NALCN|ASPH|PDZD11|TMEM120A|CHRNA5|SFXN4|SFXN5|MCOLN1|TRPM4|SFXN2|P2RX6	http://amigo.geneontology.org/amigo/term/GO:0034220
positive regulation of interleukin-6 production	Gene Ontology	GO:0032755	5	93	0.750604	0.823493	CD74|NOD1|POU2F2|TLR4|TYROBP	http://amigo.geneontology.org/amigo/term/GO:0032755
sensory perception of sound	Gene Ontology	GO:0007605	8	145	0.757948	0.829836	TJP1|TIMM9|MYO6|NIPBL|LHFPL4|EPS8L2|TIMM8B|SERPINB6	http://amigo.geneontology.org/amigo/term/GO:0007605
blood coagulation	Gene Ontology	GO:0007596	11	196	0.763817	0.834541	ITPK1|IRF2|IRF1|RAC1|P2RX5|FYN|DTNBP1|CBX5|RAD51C|RAD51B|P2RX6	http://amigo.geneontology.org/amigo/term/GO:0007596
axonogenesis	Gene Ontology	GO:0007409	5	96	0.774878	0.844888	NUMB|BAIAP2|PARD3|PICALM|CNP	http://amigo.geneontology.org/amigo/term/GO:0007409
activation of GTPase activity	Gene Ontology	GO:0090630	6	114	0.779239	0.847902	TBC1D1|TBC1D22A|SCRIB|ARHGAP22|EVI5|SIPA1L3	http://amigo.geneontology.org/amigo/term/GO:0090630
central nervous system development	Gene Ontology	GO:0007417	8	149	0.783652	0.850959	TRIO|PDGFC|EIF2B2|AHI1|DHX30|CAPG|PTS|GSN	http://amigo.geneontology.org/amigo/term/GO:0007417
lung development	Gene Ontology	GO:0030324	5	98	0.790028	0.856132	YWHAZ|BMP4|SREBF1|STK40|PPP1CA	http://amigo.geneontology.org/amigo/term/GO:0030324
cholesterol homeostasis	Gene Ontology	GO:0042632	5	99	0.797299	0.862252	HDAC9|TMEM97|COMMD9|PLSCR3|ABCA1	http://amigo.geneontology.org/amigo/term/GO:0042632
muscle organ development	Gene Ontology	GO:0007517	5	101	0.811246	0.875552	NRG1|SPEG|COPRS|CD164|FKTN	http://amigo.geneontology.org/amigo/term/GO:0007517
proteolysis	Gene Ontology	GO:0006508	37	632	0.818158	0.881221	SPCS2|AGA|NCSTN|RNPEP|ADAM15|ECE1|HTRA2|NEDD8|AMZ2|DPP9|PARK7|RNPEPL1|HM13|CFLAR|CAPN1|CTSA|C2|CTSH|MPND|CTSL|HMCES|OTULIN|CTSB|QPCTL|SENP3|USP10|SUFU|IMMP1L|JOSD2|BAP1|OTULINL|FBXL6|PRSS22|SPPL2A|PSMB5|PRCP|ATXN3	http://amigo.geneontology.org/amigo/term/GO:0006508
leukocyte migration	Gene Ontology	GO:0050900	10	190	0.821166	0.88267	CD74|ITGB2|SLC7A6|CD44|SLC16A3|FYN|ITGA6|CEACAM1|SLC3A2|PPIA	http://amigo.geneontology.org/amigo/term/GO:0050900
positive regulation of cytosolic calcium ion concentration	Gene Ontology	GO:0007204	8	157	0.828916	0.889201	BCAP31|NMU|LRP6|GNB1|CCRL2|FIS1|TRPM4|SELENOT	http://amigo.geneontology.org/amigo/term/GO:0007204
spermatogenesis	Gene Ontology	GO:0007283	27	475	0.831343	0.890006	ZFX|ERCC1|SPATA20|BAX|SBF1|DNM2|CCNA1|RACGAP1|CDK16|SNRPA1|MLH1|CIB1|PHC2|TBPL1|ATAT1|ZSCAN21|LARP7|SPAG4|STRBP|IFTAP|HERC4|RAD51C|BCAP31|CCNB1|NANOS3|UBE2B|SEPTIN7	http://amigo.geneontology.org/amigo/term/GO:0007283
meiotic cell cycle	Gene Ontology	GO:0051321	6	126	0.852414	0.909771	SIRT2|MLH1|RAD51AP1|AURKA|TUBGCP4|ZSCAN21	http://amigo.geneontology.org/amigo/term/GO:0051321
animal organ morphogenesis	Gene Ontology	GO:0009887	8	162	0.853232	0.909771	PDGFC|ASXL1|TLE1|AGRN|ABLIM1|GMNN|APLP1|LAMB3	http://amigo.geneontology.org/amigo/term/GO:0009887
calcium ion transport	Gene Ontology	GO:0006816	7	145	0.857095	0.912059	TPT1|ATP2A2|SLC3A2|FYN|RAMP1|MCOLN1|TRPM4	http://amigo.geneontology.org/amigo/term/GO:0006816
oxidation-reduction process	Gene Ontology	GO:0055114	26	469	0.861032	0.913792	NDUFS8|MSRB2|DUS4L-BCAP29|PPOX|AKR1A1|MDH2|RRM1|CYB5R2|MTHFD2L|OGFOD2|IMPDH1|FOXRED1|NDUFS3|DUS3L|SRD5A1|SCD5|ALDH16A1|ME3|PYROXD2|MTHFD2|HSD11B1L|UEVLD|MAOA|SARDH|SDHA|GPX8	http://amigo.geneontology.org/amigo/term/GO:0055114
cell differentiation	Gene Ontology	GO:0030154	59	1003	0.862165	0.913792	TSG101|TNFSF12|RBM4|CYFIP1|STRBP|PTK6|FYN|SPATA20|HUWE1|AHI1|AGRN|CAPRIN2|NDE1|ELF2|BIN1|SEPTIN7|RACGAP1|ITGB1BP1|GADD45B|CDK16|ARHGAP22|CIB1|NRG1|CITED1|ZSCAN21|EDF1|SIRT2|PDLIM7|SMARCB1|TCF3|LARP7|PRRC2C|SPAG4|SUV39H2|PRMT7|RXRB|EHF|PPARG|PARD3|HERC4|PPARA|UBE2V1|SEMA7A|SRD5A1|THOC5|NR2C1|BMP4|GPR157|C14orf93|RAB29|NANOS3|SPDEF|SCRIB|ARHGEF28|YY1AP1|SRA1|PPDPF|SPEG|HES4	http://amigo.geneontology.org/amigo/term/GO:0030154
platelet activation	Gene Ontology	GO:0030168	5	111	0.869817	0.920065	YWHAZ|GNB1|FYN|PPIA|FLNA	http://amigo.geneontology.org/amigo/term/GO:0030168
calcium ion transmembrane transport	Gene Ontology	GO:0070588	6	130	0.871891	0.920426	ANXA2|ATP2A2|NALCN|ASPH|MCOLN1|TRPM4	http://amigo.geneontology.org/amigo/term/GO:0070588
cellular response to lipopolysaccharide	Gene Ontology	GO:0071222	8	167	0.874698	0.921556	IRF3|PLSCR3|LITAF|TLR4|ABCA1|MAPK8|IRAK1|CHMP5	http://amigo.geneontology.org/amigo/term/GO:0071222
cellular protein metabolic process	Gene Ontology	GO:0044267	7	151	0.88322	0.928693	CTSH|BMP4|ANO8|GIGYF2|CSF1|TTF1|TMEM132A	http://amigo.geneontology.org/amigo/term/GO:0044267
innate immune response	Gene Ontology	GO:0045087	33	598	0.892305	0.936391	TRIM13|MAP4K2|PTK6|SEC14L1|CSF1|ADAM15|NLRC5|OPTN|SDHAF4|TYROBP|FYN|NOD1|C2|IRAK1|IFI27|SIRT2|TRIM29|OTULIN|CD46|CHUK|AIM2|PPARG|SKP2|IRF3|IRF1|PQBP1|TRIM8|G3BP1|TLR4|BST2|IPO7|TRIM5|TRIM6	http://amigo.geneontology.org/amigo/term/GO:0045087
kidney development	Gene Ontology	GO:0001822	6	136	0.897045	0.939509	BMP4|BAX|CC2D2A|PPAT|AP1B1|LZTS2	http://amigo.geneontology.org/amigo/term/GO:0001822
anatomical structure morphogenesis	Gene Ontology	GO:0009653	6	137	0.900799	0.941583	NEDD8|TRIM13|RAC1|SIX4|DEAF1|CHUK	http://amigo.geneontology.org/amigo/term/GO:0009653
defense response	Gene Ontology	GO:0006952	7	157	0.905231	0.944075	CD74|STAT6|STAT2|SP140|TNIP1|IL32|NOD1	http://amigo.geneontology.org/amigo/term/GO:0006952
peptidyl-tyrosine phosphorylation	Gene Ontology	GO:0018108	6	139	0.907954	0.944075	MAP2K2|EFEMP1|ABI1|FYN|MET|CLK3	http://amigo.geneontology.org/amigo/term/GO:0018108
positive regulation of ERK1 and ERK2 cascade	Gene Ontology	GO:0070374	10	213	0.908517	0.944075	CAVIN3|CD74|PDGFC|CD44|CFLAR|CIB1|NOD1|TLR4|BMP4|SEMA7A	http://amigo.geneontology.org/amigo/term/GO:0070374
cell adhesion	Gene Ontology	GO:0007155	36	658	0.911219	0.945033	ATP2A2|SYMPK|ITGA6|CD151|ITGB3BP|ADAM15|CTNND1|ARHGAP5|APLP1|LAMB3|ITGB1BP1|S1PR1|THBS3|CEACAM1|CIB1|PXN|FIBCD1|CLDN2|CLDN7|CTNNAL1|ITGB2|ITGB5|RAC1|CD44|DST|VCL|IL32|PARD3|NME2|CD164|PTPRF|CFDP1|FLOT2|TRIP6|TROAP|PCDHGB1	http://amigo.geneontology.org/amigo/term/GO:0007155
chemotaxis	Gene Ontology	GO:0006935	7	160	0.91484	0.94694	RAC2|RAC1|S1PR1|NUP85|CCRL2|FOSL1|CKLF	http://amigo.geneontology.org/amigo/term/GO:0006935
inflammatory response	Gene Ontology	GO:0006954	20	398	0.928129	0.958826	ITGB2|TUSC2|RAC1|HYAL3|CD44|PARK7|PLD3|CHUK|CCRL2|HDAC9|TPST1|TNIP1|NOD1|POLB|TLR4|CIITA|AIM2|SEMA7A|PRDX5|CSF1	http://amigo.geneontology.org/amigo/term/GO:0006954
positive regulation of protein kinase B signaling	Gene Ontology	GO:0051897	8	191	0.944823	0.974176	RAC2|RAC1|PARK7|FYN|HSP90AB1|MET|NRG1|ITGB1BP1	http://amigo.geneontology.org/amigo/term/GO:0051897
regulation of transcription by RNA polymerase II	Gene Ontology	GO:0006357	94	1641	0.952529	0.980219	ZFX|HSF4|CREBZF|ZNF384|SIX4|SIX5|DEAF1|ZNF266|ZNF789|HDGF|ZNF664|ZSCAN21|ZNF44|TSC22D2|EHF|NR2C1|SMARCD1|ZNF444|PCGF3|LITAF|ZNF846|DDX5|ZKSCAN3|HMGN1|ZNF774|ZNF410|ZNF561|ZNF195|ZNF211|FUS|FOXP4|ZNF75A|SP140|ZSCAN9|ZFP90|ESRRA|TADA2A|CAMTA2|CAMTA1|ZNF287|ZNF517|SUPT20H|TCF3|CUX1|ZNF586|ZNF28|IRF3|IRF2|IRF1|PPARG|IRF9|SPDEF|TOX2|HNRNPK|HES4|ZNF429|FOXP1|ZNF836|NEDD8|STAT6|ZNF530|STAT2|ZNF740|PDCD6…	http://amigo.geneontology.org/amigo/term/GO:0006357
positive regulation of angiogenesis	Gene Ontology	GO:0045766	6	158	0.956405	0.982304	CTSH|TNFSF12|ITGB2|HMGA2|GRN|PDCD6	http://amigo.geneontology.org/amigo/term/GO:0045766
visual perception	Gene Ontology	GO:0007601	7	208	0.987285	1	HSF4|NRL|EFEMP1|CNGA1|ABLIM1|PDE6D|KIFC3	http://amigo.geneontology.org/amigo/term/GO:0007601
cytokine-mediated signaling pathway	Gene Ontology	GO:0019221	12	311	0.988081	1	YWHAZ|STAT6|ITGB2|STAT2|GRB10|S1PR1|FYN|CSF1|UBA52|IL32|MAOA|IRAK1	http://amigo.geneontology.org/amigo/term/GO:0019221
chemical synaptic transmission	Gene Ontology	GO:0007268	9	270	0.994506	1	KCNC4|DLG1|LRP6|CNP|EXOC4|APBA2|CHRNA5|GLS|ATXN3	http://amigo.geneontology.org/amigo/term/GO:0007268
ion transport	Gene Ontology	GO:0006811	30	674	0.994626	1	KCNC4|ATP2A2|NIPA2|TMEM120A|SLC25A37|SFXN5|SFXN2|ATP5MC1|VDAC2|P2RX5|P2RX6|SLC39A11|NALCN|RACGAP1|TRPM4|ATP5MF|ATP6V0B|CALHM2|KCNQ5|SLC25A22|CHRNA5|COMMD9|SLC25A26|CNNM3|SLC20A1|CNGA1|ATP5PF|ATP6V1E1|SFXN4|MCOLN1	http://amigo.geneontology.org/amigo/term/GO:0006811
immune system process	Gene Ontology	GO:0002376	37	818	0.996663	1	CD74|TRIM13|TAP2|SEC14L1|PQBP1|MAP4K2|NLRC5|MAP3K8|OPTN|SKP2|CTPS1|TYROBP|FYN|PRR7|NOD1|TRPM4|C2|IRAK1|IFI27|SIRT2|TRIM29|OTULIN|CD46|AIM2|MCOLN1|IRF3|IRF2|IRF1|PLD3|IRF9|CSF1|TRIM8|G3BP1|TLR4|BST2|TRIM5|HLA-DMA	http://amigo.geneontology.org/amigo/term/GO:0002376
regulation of immune response	Gene Ontology	GO:0050776	5	202	0.997981	1	SPPL2A|TYROBP|IRF1|ITGB2|COL17A1	http://amigo.geneontology.org/amigo/term/GO:0050776
negative regulation of inflammatory response to antigenic stimulus	Gene Ontology	GO:0002862	5	202	0.997981	1	FYN|RAMP1|GNAS|GNB1|ADCY3	http://amigo.geneontology.org/amigo/term/GO:0002862
multicellular organism development	Gene Ontology	GO:0007275	52	1157	0.999482	1	TNFSF12|CYFIP1|DEAF1|TLE1|AHI1|AGRN|PDLIM7|NDE1|BIN1|SUPT20H|PLXNB2|CCDC120|RACGAP1|SIX5|GADD45B|FYN|ARHGAP22|NIPBL|ARHGDIB|RNF111|CITED1|GPR161|SPATA20|ANGPTL2|EDF1|ZMYM3|PDGFC|ARIH2|PHC2|HMGA2|EHF|CUX1|NUMB|SUFU|LRP6|C12orf43|SEMA7A|RACK1|STRBP|BMP4|GPR157|NRL|NANOS3|SPDEF|CD164|SCRIB|SIX4|CFDP1|PPDPF|KIAA1217|HES4|MET	http://amigo.geneontology.org/amigo/term/GO:0007275
cell surface receptor signaling pathway	Gene Ontology	GO:0007166	8	310	0.99967	1	MADD|GPR157|CSNK1A1|IRF9|FYN|MET|ADGRL1|ADGRB2	http://amigo.geneontology.org/amigo/term/GO:0007166
immune response	Gene Ontology	GO:0006955	15	469	0.999723	1	CD74|TNFSF12|AIM2|MAP4K2|CTSL|CIITA|CD164|CCRL2|CHUK|IL32|TLR4|IFI44|SEMA7A|PRKRA|HLA-DMA	http://amigo.geneontology.org/amigo/term/GO:0006955
adaptive immune response	Gene Ontology	GO:0002250	13	481	0.999976	1	CTSH|CD74|TAP2|CTSL|CD46|FYN|PRR7|MCOLN1|TRPM4|BTN2A2|BTN2A1|YWHAZ|HLA-DMA	http://amigo.geneontology.org/amigo/term/GO:0002250
signal transduction	Gene Ontology	GO:0007165	92	2064	0.999997	1	CCRL2|ARFRP1|MAP3K8|TYROBP|MPP1|INPP4B|ARHGAP23|ARHGAP22|ARHGAP27|IRAK1|PEX11A|BMP4|ADCY3|GRB10|CCND3|PKIG|CSF1|STARD8|BST1|TLR4|TRIP6|TNFSF12|RASSF7|STAC|DNM2|ARHGAP5|CRADD|PLXNB2|PPP1R1C|GRK4|GPR161|ITPK1|PPARG|GRN|CKLF|CSNK1A1|GNAS|MOK|SIGIRR|IPO7|TOR2A|PPP2R5B|PI4KB|TLE1|RTKN|SH3BP2|NPHP4|GPRC5A|HINT1|STAT6|OPTN|STAT2|RACGAP1|S1PR1|HNRNPK|ADGRB2|PLPP1|GNB4|GNB1|CHRNA5|AGAP3|PRKAA1|ADGRL1|HDGF…	http://amigo.geneontology.org/amigo/term/GO:0007165
response to stimulus	Gene Ontology	GO:0050896	5	565	1	1	CNGA1|DTNBP1|PDE6D|NRL|ADCY3	http://amigo.geneontology.org/amigo/term/GO:0050896
G protein-coupled receptor signaling pathway	Gene Ontology	GO:0007186	26	1147	1	1	GNB1|ZNF219|RIC8A|CCRL2|ECE1|GABBR1|GPRC5A|CALM2|S1PR1|GPR161|ADGRB2|ARHGEF11|TRIO|RAC2|GNB4|RAMP1|PPARG|ADGRL1|NMU|GPR157|RGS10|GNAS|ADCY3|PSAP|RGS19|ABCA1	http://amigo.geneontology.org/amigo/term/GO:0007186
--------------------
